# Supplementary material for: Selective thienylation of fluorinated benzothiadiazoles and benzotriazoles for organic photovoltaics
Source: Royal Society of Chemistry journal article supplement (doi:10.1039/c3sc53119h), 2013-12-13

*Supporting Information for*

# **Selective Thienylation of Fluorinated Benzothiadiazoles and Benzotriazoles for Organic Photovoltaics**

**Chun-Yang He,<sup>b</sup> Cai-Zhi Wu,<sup>b</sup> Yan-Lin Zhu,<sup>a</sup> and Xingang Zhang<sup>\*a</sup>**

<sup>a</sup>*Key Laboratory of Organofluorine Chemistry, Shanghai Institute of Organic Chemistry, Chinese Academy of Sciences,  
345 Lingling Road, Shanghai 200032, China*

<sup>b</sup>*College of Chemistry, Chemical Engineering and Biotechnology, Donghua University, 2999 North Renmin Lu,  
Shanghai 201620, China*

[xgzhang@mail.sioc.ac.cn](mailto:xgzhang@mail.sioc.ac.cn)

## List of Contents

|                                                                                                                                |     |
|--------------------------------------------------------------------------------------------------------------------------------|-----|
| 1) Procedure for the preparation of compounds <b>1</b> and <b>4</b>                                                            | S03 |
| 2) General Procedure for Selective Thienylation of FBT <b>1</b> with Thiophenes                                                | S05 |
| 3) Data for compounds <b>3</b>                                                                                                 | S05 |
| 4) General procedure for the preparation of compounds <b>6a</b> and <b>6b</b>                                                  | S13 |
| 5) Data for compounds <b>6</b>                                                                                                 | S13 |
| 6) General procedure for the preparation of compounds <b>7a</b> and <b>7c-e</b>                                                | S14 |
| 7) Data for compounds <b>7</b>                                                                                                 | S14 |
| 8) General Procedure for the preparation of compounds <b>9a-d</b>                                                              | S15 |
| 9) Data for compounds <b>9a-d</b>                                                                                              | S15 |
| 10) Data for compounds <b>11</b> , <b>12</b> and <b>14</b>                                                                     | S18 |
| 11) Copies of <sup>1</sup> H NMR, <sup>19</sup> F NMR and <sup>13</sup> C NMR spectra of <b>1</b> , <b>3</b> and <b>4</b>      | S22 |
| 12) Copies of <sup>1</sup> H NMR, <sup>19</sup> F NMR and <sup>13</sup> C NMR spectra of <b>6</b> , <b>7</b> and <b>9</b>      | S48 |
| 13) Copies of <sup>1</sup> H NMR, <sup>19</sup> F NMR and <sup>13</sup> C NMR spectra of <b>11</b> , <b>12</b> , and <b>14</b> | S64 |

**General information:**  $^1\text{H}$  NMR and  $^{13}\text{C}$  NMR spectra were recorded on a Agilent AM400 and AM500 spectrometer.  $^{19}\text{F}$  NMR was recorded on a Agilent AM400 spectrometer ( $\text{CFCl}_3$  as outside standard and low field is positive). Chemical shifts ( $\delta$ ) are reported in ppm, and coupling constants ( $J$ ) are in Hertz (Hz). The following abbreviations were used to explain the multiplicities: s = singlet, d = doublet, t = triplet, q = quartet, m = multiplet, br = broad. NMR yield was determined by  $^{19}\text{F}$  NMR using fluorobenzene as an internal standard before working up the reaction.

**Materials:** All reagents were used as received from commercial sources. All reagents were weighed and handled in air, and refilled with an inert atmosphere of  $\text{N}_2$  at room temperature. DMF and DMSO were distilled under reduced pressure from  $\text{CaH}_2$ . The DMSO was stored with the powder of 4 Å molecular sieves. Toluene and 1,4-Dioxane was distilled from sodium and benzophenone immediately before use.

#### Procedure for the preparation of compound 1.

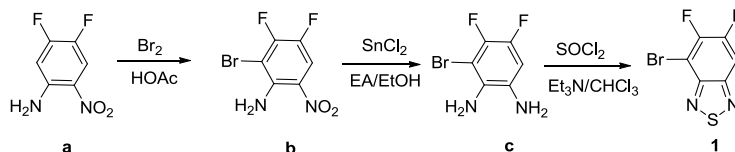

**2-Bromo-3,4-difluoro-6-nitroaniline (b).**<sup>1</sup> To a solution of 4,5-difluoro-2-nitroaniline (17.4 g, 100 mmol) in acetic acid (100 ml) was added bromine (32 g, 2 equiv) dropwise at 50- 56 °C, and stirred for 2.5 hours. The reaction mixture was poured into ice water (250 mL) and the resulting precipitate was collected by filtration and washed with water sufficiently then dried to give compound **b** (23.3 g, 92% yield) as a yellow solid.

**3-Bromo-4,5-difluorobenzene-1,2-diamine (c).**<sup>2</sup> To a solution of **b** (7.6 g, 30 mmol) and  $\text{SnCl}_2 \cdot 2\text{H}_2\text{O}$  (34 g, 150 mmol) were dissolved in 70 mL ethyl acetate and 30 mL absolute ethanol under  $\text{N}_2$ . Then the mixture was heated at 75 °C with stirring for 3 h. The reaction mixture was then cooled to room temperature, and poured into 200 mL ice water. Aqueous saturated solution of  $\text{NaHCO}_3$  was added to adjust the pH to 5. The residue was extracted with ethyl acetate. The combined organic layers were dried over  $\text{Na}_2\text{SO}_4$ , filtered, and concentrated. The residue (5.6 g, 75%

yield) was used for the next step without further purification.

**4-Bromo-5,6-difluorobenzo[c][1,2,5]thiadiazole (1).** To a 500 mL three-necked round bottom flask were added **c** (5.6 g, 25 mmol),  $\text{CHCl}_3$  (150 mL) and triethylamine (11.4 mL, 4 equiv). After stirring for 15 min, thionyl chloride ( $\text{SOCl}_2$ , 7.2 g, 2 equiv) was added dropwise and the mixture was heated to reflux for 5 h. The reaction mixture was then cooled to room temperature, and concentrated. The residue was extracted with  $\text{CH}_2\text{Cl}_2$ , washed with water and brine. The combined organic layers were dried over  $\text{Na}_2\text{SO}_4$ , filtered, and concentrated. The residue was purified with silica gel column chromatography (100% hexane) to give FBT **1** as a white solid (5.1 g, 81% yield).  $^1\text{H}$  NMR (300 MHz,  $\text{CDCl}_3$ )  $\delta$  7.30 (apparent t,  $J = 8.1$  Hz, 1H).  $^{19}\text{F}$  NMR (376 MHz,  $\text{CDCl}_3$ )  $\delta$  -120.5 (dd,  $J = 19.9$  Hz, 7.5 Hz, 1F), -125.7 (dd,  $J = 19.7$  Hz, 8.8 Hz, 1F).

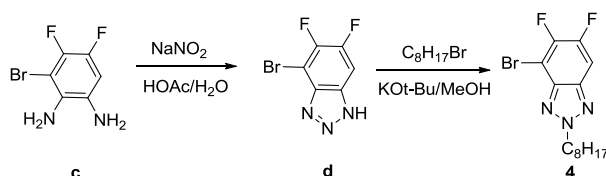

**4-Bromo-5,6-difluoro-1H-benzo[d][1,2,3]triazole (d).** To a solution of HOAc (2.4 mL, 40 mmol) in 100 mL of  $\text{H}_2\text{O}$  was added compound **c** (4.66 g, 20 mmol). The reaction mixture was heated to 70  $^\circ\text{C}$  and stirred for 1 h. The reaction mixture was then cooled to room temperature, a solution of  $\text{NaNO}_2$  (1.52 g) in 20 mL of  $\text{H}_2\text{O}$  was then added. The resulting reaction mixture was stirred for another 1 h at room temperature. The resulting precipitate was filtered to give compound **d** (3.51 g, 75% yield) without further purification.

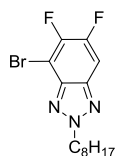

**4-Bromo-5,6-difluoro-2-octyl-2H-benzo[d][1,2,3]triazole (4).** To a solution of **d** (2.3 g, 10 mmol) in 50 mL of methanol were added *t*BuOK (1.15 g, 1.02 equiv) and  $\text{C}_8\text{H}_{17}\text{Br}$  (1.95 g, 1.01 equiv) under  $\text{N}_2$ . The reaction mixture was then heated to reflux for 24 h. The reaction mixture was cooled to room temperature, and was extracted with ethyl acetate. The combined organic layers were dried over  $\text{Na}_2\text{SO}_4$ , filtered, and concentrated. The product (1.20 g, 35% yield) was purified with silica gel chromatography (Petroleum ether (100%)) as colorless oil.  $^1\text{H}$  NMR (400 MHz,  $\text{CDCl}_3$ )  $\delta$  7.55 (dd,  $J$

= 8.6 Hz, 7.0 Hz, 1H), 4.70 (t,  $J$  = 7.4 Hz, 2H), 2.10 (m, 2H), 1.40-1.15 (m, 10H), 0.86 (t,  $J$  = 6.8 Hz, 3H).  $^{19}\text{F}$  NMR (376 MHz,  $\text{CDCl}_3$ ) -128.9 (dd,  $J$  = 19.2 Hz, 6.8 Hz, 1F), -129.7 (dd,  $J$  = 19.7 Hz, 8.8 Hz, 1F).

### General Procedure for Selective Thienylation of FBT 1 with Thiophenes.

To a 25 mL of sealed tube were added  $\text{Pd}(\text{TFA})_2$  (2.5 mol %),  $\text{Ag}_2\text{O}$  (93 mg 2.0 equiv) and 4-bromo-5,6-difluorobenzo[*c*][1,2,5]thiadiazole (**1**) (50 mg, 1 equiv) under  $\text{N}_2$ , followed by DMSO (1 mL) with stirring. Thiophene **2** (0.4 mmol, 2 equiv) were then added subsequently. The reaction mixture was stirred at 80 °C (preheated oil bath). After stirring for 6 h, the reaction mixture was cooled to room temperature, filtered and diluted with dichloromethane, washed with brine, dried over  $\text{Na}_2\text{SO}_4$ , filtered and concentrated. The residue was purified with silica gel chromatography to provide pure product.

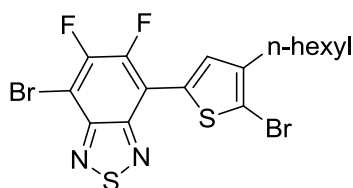

**4-Bromo-7-(5-bromo-4-hexylthiophen-2-yl)-5,6-difluorobenzo[*c*][1,2,5]thiadiazole (3a).** The product (80 mg, 81% yield) was purified with silica gel chromatography (Petroleum ether(100%)) as a yellow solid. m.p. 91 °C.  $^1\text{H}$  NMR (400 MHz,  $\text{CDCl}_3$ )  $\delta$  7.94 (s, 1H), 2.65 (t,  $J$  = 7.6 Hz, 2H), 1.66 (m, 2H), 1.45-1.25 (m, 6H), 0.90 (t,  $J$  = 7.0 Hz, 3H).  $^{19}\text{F}$  NMR (376 MHz,  $\text{CDCl}_3$ )  $\delta$  -120.2 (d,  $J$  = 18.4 Hz, 1F), -126.7 (d,  $J$  = 18.4 Hz, 1F).  $^{13}\text{C}$  NMR (100 MHz,  $\text{CDCl}_3$ )  $\delta$  152.0 (dd,  $J$  = 255.4 Hz, 19.8 Hz), 149.8 (d,  $J$  = 5.3 Hz), 149.1 (dd,  $J$  = 261.5 Hz, 19.4 Hz), 147.4 (d,  $J$  = 8.9 Hz), 142.7, 132.2 (d,  $J$  = 9.9 Hz), 130.5 (m), 114.9 (d,  $J$  = 8.1 Hz), 112.6 (d,  $J$  = 11.5 Hz), 97.1 (d,  $J$  = 22.3 Hz), 31.6, 29.7, 29.5, 28.9, 22.6, 14.1. MS (EI):  $m/z$  (%) 496 ( $\text{M}^+$ ), 366, 345, 252, 41(100). HRMS: Calculated for  $\text{C}_{16}\text{H}_{14}\text{N}_2\text{F}_2\text{S}_2\text{Br}_2$ : 493.8933; Found: 493.8930.

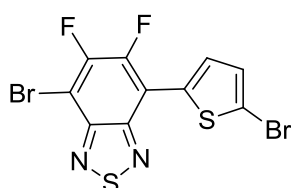

**4-Bromo-7-(5-bromothiophen-2-yl)-5,6-difluorobenzo[c][1,2,5]thiadiazole (3b).** The product (60 mg, 73% yield) was purified with silica gel chromatography (Petroleum ether(100%)) as a yellow solid. m.p. 155 °C.  $^1\text{H}$  NMR (400 MHz,  $\text{CDCl}_3$ )  $\delta$  8.00 (d,  $J = 4.2$  Hz, 1H), 7.20 (d,  $J = 4.2$  Hz, 1H).  $^{19}\text{F}$  NMR (376 MHz,  $\text{CDCl}_3$ )  $\delta$  -120.1 (d,  $J = 19.2$  Hz, 1F), -126.6 (d,  $J = 19.2$  Hz, 1F).  $^{13}\text{C}$  NMR (100 MHz,  $\text{CDCl}_3$ )  $\delta$  152.2 (dd,  $J = 255.4$  Hz, 20.0 Hz), 149.8(d,  $J = 5.5$  Hz), 149.2 (dd,  $J = 261.8$  Hz, 19.5 Hz), 147.4 (d,  $J = 8.4$  Hz), 134.8 (d,  $J = 8.0$  Hz), 130.8 (d,  $J = 10.3$  Hz), 129.6 (m), 126.6, 112.4 (d,  $J = 11.9$  Hz), 97.4 (d,  $J = 23.5$  Hz). MS (EI):  $m/z$  (%) 414 ( $\text{M}^+$ ), 312 ( $\text{M}^+$ ), 310 ( $\text{M}^+$ ), 40 (100). HRMS: Calculated for  $\text{C}_{10}\text{H}_2\text{N}_2\text{F}_2\text{S}_2\text{Br}_2$ : 409.7994; Found: 409.7991.

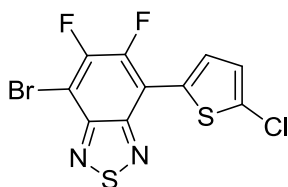

**4-Bromo-7-(5-chlorothiophen-2-yl)-5,6-difluorobenzo[c][1,2,5]thiadiazole (3c).** The product (54 mg, 74% yield) was purified with silica gel chromatography (Petroleum ether(100%)) as a yellow solid. m.p. 137 °C.  $^1\text{H}$  NMR (400 MHz,  $\text{CDCl}_3$ )  $\delta$  8.03 (d,  $J = 4.0$  Hz, 1H), 7.06 (dd,  $J = 4.0$  Hz, 1.2 Hz, 1H).  $^{19}\text{F}$  NMR (376 MHz,  $\text{CDCl}_3$ )  $\delta$  -120.1 (d,  $J = 19.0$  Hz, 1F), -126.8 (d,  $J = 19.0$  Hz, 1F).  $^{13}\text{C}$  NMR (100 MHz,  $\text{CDCl}_3$ )  $\delta$  152.2 (dd,  $J = 255.5$  Hz, 20.0 Hz), 149.8 (d,  $J = 5.4$  Hz), 149.2 (dd,  $J = 261.7$  Hz, 19.4 Hz), 147.4 (d,  $J = 8.5$  Hz), 134.8 (d,  $J = 8.0$  Hz), 130.8 (d,  $J = 10.3$  Hz), 129.6 (m), 126.6, 112.4 (d,  $J = 12.6$  Hz), 97.4 (d,  $J = 21.9$  Hz). MS (EI):  $m/z$  (%) 368 ( $\text{M}^+$ ,100), 366 ( $\text{M}^+$ ), 332, 252. HRMS: Calculated for  $\text{C}_{10}\text{H}_2\text{N}_2\text{F}_2\text{S}_2\text{BrCl}$ : 365.8499; Found: 365.8496.

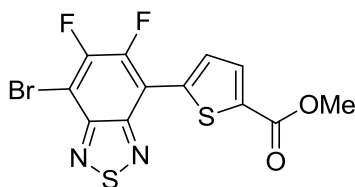

**Methyl 5-(7-bromo-5,6-difluorobenzo[c][1,2,5]thiadiazol-4-yl)thiophene-2-carboxylate (3d).** The product (59 mg, 76%) was purified with silica gel chromatography (Petroleum ether /Dichloromethane = 50:1) as a yellow solid. m.p. 154 °C.  $^1\text{H}$  NMR (400 MHz,  $\text{CDCl}_3$ )  $\delta$  8.21 (d,  $J = 3.6$  Hz, 1H), 7.90 (dd,  $J = 4.2$  Hz, 1.0 Hz, 1H), 3.95 (s, 3H).  $^{19}\text{F}$  NMR (376 MHz,  $\text{CDCl}_3$ )  $\delta$  -119.9 (d,  $J = 17.7$  Hz, 1F), -124.6 (d,  $J = 17.7$  Hz, 1F).  $^{13}\text{C}$  NMR (100 MHz,  $\text{CDCl}_3$ )  $\delta$  162.4, 152.2 (dd,  $J =$

256.1 Hz, 19.8 Hz), 150.0 (dd,  $J = 264.0$  Hz, 19.6 Hz), 149.8, 147.5 (d,  $J = 7.9$  Hz), 137.0 (m), 136.0 (d,  $J = 6.2$  Hz), 133.2, 131.4 (d,  $J = 9.5$  Hz), 112.3 (d,  $J = 10.3$  Hz), 98.9 (d,  $J = 21.6$  Hz), 52.4. MS (EI):  $m/z$  (%) 392 ( $M^+$ ), 390 ( $M^+$ ), 361(100). HRMS: Calculated for  $C_{12}H_5N_2O_2S_2F_2Br$ : 389.8944; Found: 389.8942.

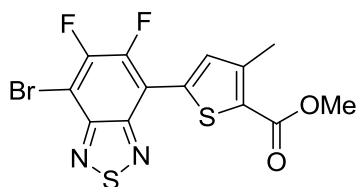

### Methyl

#### 5-(7-bromo-5,6-difluorobenzo[c][1,2,5]thiadiazol-4-yl)-3-methylthiophene-2-carboxylate (3e).

The product (68 mg, 84% yield) was purified by silica chromatography (Petroleum ether /Ethyl Acetate = 50:1) as a yellow solid. m.p. 160 °C.  $^1H$  NMR (400 MHz,  $CDCl_3$ )  $\delta$  8.00 (s, 1H), 3.92 (s, 3H), 2.64 (s, 3H).  $^{19}F$  NMR (376 MHz,  $CDCl_3$ )  $\delta$  -120.0 (d,  $J = 18.2$  Hz, 1F), -124.7 (d,  $J = 18.2$  Hz, 1F).  $^{13}C$  NMR (100 MHz,  $CDCl_3$ )  $\delta$  163.0, 152.2 (dd,  $J = 255.8$  Hz, 19.8 Hz), 150.0 (dd,  $J = 264.0$  Hz, 19.6 Hz), 149.8, 147.5 (d,  $J = 7.9$  Hz), 146.0, 145.1 (d,  $J = 5.0$  Hz), 135.1 (d,  $J = 9.2$  Hz), 134.2 (m), 129.2 (d,  $J = 6.2$  Hz), 98.7 (d,  $J = 20.6$  Hz), 52.0, 16.0. MS (EI):  $m/z$  (%) 406 ( $M^+$ ), 404 ( $M^+$ ), 375 (100), 346. HRMS: Calculated for  $C_{13}H_7N_2O_2S_2F_2Br$ : 403.9100; Found: 403.9104.

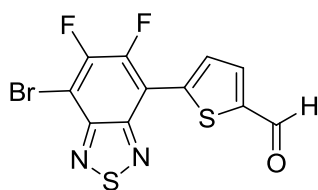

**5-(7-Bromo-5,6-difluorobenzo[c][1,2,5]thiadiazol-4-yl)thiophene-2-carbaldehyde (3f).** The product (53 mg, 74% yield) was purified by silica chromatography (Petroleum ether /Ethyl Acetate = 50:1) as a yellow solid. m.p. 165 °C.  $^1H$  NMR (400 MHz,  $CDCl_3$ )  $\delta$  10.04 (s, 1H), 8.32 (d,  $J = 4.0$  Hz, 1H), 7.88 (dd,  $J = 4.0$  Hz, 1.2 Hz, 1H).  $^{19}F$  NMR (376 MHz,  $CDCl_3$ )  $\delta$  -119.8 (d,  $J = 19.2$  Hz, 1F), -123.5 (d,  $J = 19.2$  Hz, 1F).  $^{13}C$  NMR (100 MHz,  $CDCl_3$ )  $\delta$  183.2, 152.2 (dd,  $J = 256.1$  Hz, 19.8 Hz), 150.3 (dd,  $J = 264.9$  Hz, 19.3 Hz), 149.8 (d,  $J = 5.1$  Hz), 147.4 (d,  $J = 7.8$  Hz), 145.4 (d,  $J = 5.5$  Hz), 139.6 (m), 135.6, 131.7 (d,  $J = 9.4$  Hz), 112.1, 99.8 (d,  $J = 21.5$  Hz). MS (EI):  $m/z$  (%) 362 ( $M^+$ , 100), 360 ( $M^+$ , 100), 332, 289. HRMS: Calculated for  $C_{11}H_3ON_2BrS_2F_2$ : 359.8838; Found: 359.8834.

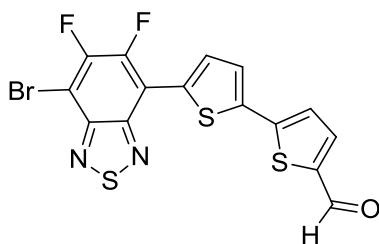

**5'-(7-Bromo-5,6-difluorobenzo[c][1,2,5]thiadiazol-4-yl)-[2,2'-bithiophene]-5-carbaldehyde (3g).**

The product (58 mg, 66% yield) was purified with silica gel chromatography (Petroleum ether /Ethyl Acetate = 50:1) as a yellow solid. m.p. 158 °C. <sup>1</sup>H NMR (400 MHz, CDCl<sub>3</sub>) δ 9.90 (s, 1H), 8.21 (d, *J* = 4.0 Hz, 1H), 7.72 (d, *J* = 4.0 Hz, 1H), 7.46 (dd, *J* = 4.0 Hz, 1.2 Hz, 1H), 7.39 (d, *J* = 4.0 Hz, 1H). <sup>19</sup>F NMR (376 MHz, CDCl<sub>3</sub>) δ -120.1 (d, *J* = 19.0 Hz, 1F), -125.5 (d, *J* = 19.0 Hz, 1F). MS (EI): *m/z* (%) 444 (M<sup>+</sup>, 100), 442 (M<sup>+</sup>, 100), 369. HRMS: Calculated for C<sub>15</sub>H<sub>5</sub>ON<sub>2</sub>BrS<sub>3</sub>F<sub>2</sub>: 441.8715; Found: 441.8711.

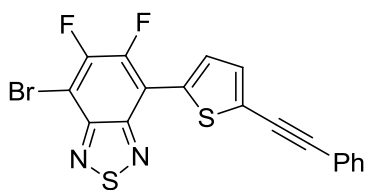

**4-Bromo-5,6-difluoro-7-(5-(phenylethynyl)thiophen-2-yl)benzo[c][1,2,5]thiadiazole (3h).** The product (64 mg, 74% yield) was purified with silica gel chromatography (Petroleum ether(100%)) as a yellow solid. m.p. 166 °C. <sup>1</sup>H NMR (400 MHz, CDCl<sub>3</sub>) δ 8.18 (d, *J* = 4.0 Hz, 1H), 7.60-7.50 (m, 2H), 7.40-7.34 (m, 4H). <sup>19</sup>F NMR (376 MHz, CDCl<sub>3</sub>) δ -120.2 (d, *J* = 19.2 Hz, 1F), -126.2 (d, *J* = 19.2 Hz, 1F). <sup>13</sup>C NMR (100 MHz, CDCl<sub>3</sub>) δ 152.4 (dd, *J* = 255.4 Hz, 19.6 Hz), 149.8 (d, *J* = 5.5 Hz), 149.4 (dd, *J* = 262.8 Hz, 19.2 Hz), 147.6 (d, *J* = 8.5 Hz), 132.1, 131.46, 131.41 131.3, 128.8, 128.4, 127.3 (d, *J* = 7.3 Hz), 122.6, 112.7 (d, *J* = 11.6 Hz), 97.5 (d, *J* = 21.5 Hz), 96.1, 82.2. MS (EI): *m/z* (%) 435 (M<sup>+</sup>), 434 (M<sup>+</sup>, 100), 433 (M<sup>+</sup>), 432 (M<sup>+</sup>), 145. HRMS: Calculated for C<sub>18</sub>H<sub>7</sub>N<sub>2</sub>F<sub>2</sub>S<sub>2</sub>Br: 431.9202; Found: 431.9201.

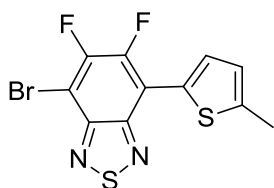



**4-Bromo-5,6-difluoro-7-(5-methylthiophen-2-yl)benzo[c][1,2,5]thiadiazole (3i).** The product (50 mg, 72% yield) was purified with silica gel chromatography (Petroleum ether(100%)) as a yellow solid. m.p. 155 °C. <sup>1</sup>H NMR (400 MHz, CDCl<sub>3</sub>) δ 8.02 (d, *J* = 4.0 Hz, 1H), 6.89 (dd, *J* = 2.4 Hz, 1.2 Hz 1H), 2.58 (s, 3H). <sup>19</sup>F NMR (376 MHz, CDCl<sub>3</sub>) δ -120.4 (d, *J* = 19.2 Hz, 1F), -127.7 (d, *J* = 19.2 Hz, 1F). <sup>13</sup>C NMR (100 MHz, CDCl<sub>3</sub>) δ 152.3 (dd, *J* = 255.0 Hz, 20.0 Hz), 149.8 (d, *J* = 5.6 Hz), 148.7 (dd, *J* = 260.2 Hz, 19.2 Hz), 147.8 (d, *J* = 8.6 Hz), 144.6 (d, *J* = 6.6 Hz), 131.7 (d, *J* = 8.9 Hz), 128.4 (m), 126.0, 113.6 (d, *J* = 12.4 Hz), 96.2 (d, *J* = 20.5 Hz), 15.3. MS (EI): *m/z* (%) 348 (M<sup>+</sup>, 100), 347 (M<sup>+</sup>), 346 (M<sup>+</sup>). HRMS: Calculated for C<sub>11</sub>H<sub>5</sub>N<sub>2</sub>F<sub>2</sub>S<sub>2</sub>Br: 345.9046; Found: 345.9045.

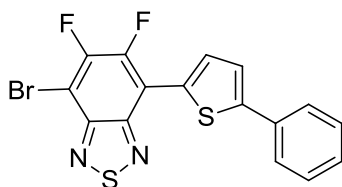

**4-Bromo-5,6-difluoro-7-(5-phenylthiophen-2-yl)benzo[c][1,2,5]thiadiazole (3j).** The product (69 mg, 84% yield) was purified with silica gel chromatography (Petroleum ether(100%)) as a yellow solid. m.p. 124 °C. <sup>1</sup>H NMR (400 MHz, CDCl<sub>3</sub>) δ 8.22 (d, *J* = 4.0 Hz, 1H), 7.70 (d, *J* = 8.0 Hz, 2H), 7.46-7.38 (m, 3H), 7.34 (t, *J* = 7.2 Hz, 1H). <sup>19</sup>F NMR (376 MHz, CDCl<sub>3</sub>) δ -121.0 (d, *J* = 17.7 Hz, 1F), -127.4 (d, *J* = 17.7 Hz, 1F). <sup>13</sup>C NMR (100 MHz, CDCl<sub>3</sub>) δ 152.4 (dd, *J* = 255.2 Hz, 20.0 Hz), 149.9 (d, *J* = 5.2 Hz), 149.4 (dd, *J* = 261.3 Hz, 19.0 Hz), 148.2 (d, *J* = 6.6 Hz), 147.7 (d, *J* = 9.0 Hz), 133.6, 132.5 (d, *J* = 9.3 Hz), 130.1, 129.0, 128.3, 126.0, 123.5, 113.3 (d, *J* = 11.5 Hz), 96.7 (d, *J* = 23.3 Hz). MS (EI): *m/z* (%) 411 (M<sup>+</sup>), 410 (M<sup>+</sup>), 408 (M<sup>+</sup>), 121, 83 (100). HRMS: Calculated for C<sub>16</sub>H<sub>7</sub>N<sub>2</sub>S<sub>2</sub>BrF<sub>2</sub>: 407.9202; Found: 407.9197.

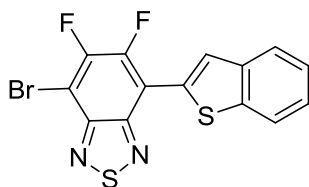

**4-(Benzo[b]thiophen-2-yl)-7-bromo-5,6-difluorobenzo[c][1,2,5]thiadiazole (3k).** The product (66 mg, 86% yield) was purified with silica gel chromatography (Petroleum ether(100%)) as a yellow solid. m.p. 169 °C. <sup>1</sup>H NMR (400 MHz, CDCl<sub>3</sub>) δ 8.48 (s, 1H), 7.89 (m, 2H), 7.41 (m, 2H). <sup>19</sup>F NMR (376 MHz, CDCl<sub>3</sub>) δ -120.1 (d, *J* = 18.4 Hz, 1F), -125.3 (d, *J* = 18.4 Hz, 1F). <sup>13</sup>C NMR (100 MHz,

$\text{CDCl}_3$ )  $\delta$  152.3 (dd,  $J = 255.6$  Hz, 20.0 Hz), 150.1 (dd,  $J = 262.8$  Hz, 19.2 Hz), 149.9 (d,  $J = 5.3$  Hz), 148.0 (d,  $J = 8.1$  Hz), 140.9 (d,  $J = 5.7$  Hz), 139.0, 130.8 (m), 128.5 (d,  $J = 8.4$  Hz), 125.8, 124.8, 124.5, 121.9, 113.4 (d,  $J = 11.7$  Hz), 98.2 (d,  $J = 19.6$  Hz). MS (EI):  $m/z$  (%) 385 ( $\text{M}^+$ ), 384 ( $\text{M}^+$ , 100), 383 ( $\text{M}^+$ ), 382 ( $\text{M}^+$ ). HRMS: Calculated for  $\text{C}_{14}\text{H}_5\text{N}_2\text{F}_2\text{S}_2\text{Br}$ : 381.9041; Found: 381.9042.

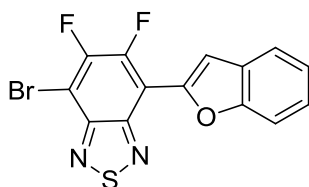

**4-(Benzofuran-2-yl)-7-bromo-5,6-difluorobenzo[c][1,2,5]thiadiazole (3l).** The product (39 mg, 53% yield) was purified with silica gel chromatography (Petroleum ether) as a yellow solid. m.p. 168 °C.  $^1\text{H}$  NMR (400 MHz,  $\text{CDCl}_3$ )  $\delta$  8.00 (s, 1H), 7.71 (d,  $J = 7.2$  Hz, 1H), 7.63 (d,  $J = 8.4$  Hz, 1H), 7.41 (t,  $J = 7.2$  Hz, 1H), 7.31 (t,  $J = 7.6$  Hz, 1H).  $^{19}\text{F}$  NMR (376 MHz,  $\text{CDCl}_3$ )  $\delta$  -119.9 (d,  $J = 17.7$  Hz, 1F), -125.8 (d,  $J = 17.7$  Hz, 1F). MS (EI):  $m/z$  (%) 369 ( $\text{M}^+$ ), 368 ( $\text{M}^+$ ), 367 ( $\text{M}^+$ ), 366 ( $\text{M}^+$ ), 141(100). Anal.Calcd for  $\text{C}_{14}\text{H}_5\text{BrF}_2\text{N}_2\text{OS}$ : C, 45.80; H, 1.37; N, 7.63. Found C, 45.57; H, 1.24; N, 7.80.

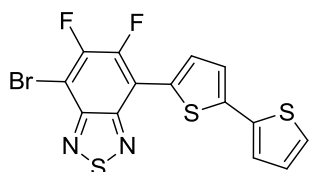

**4-([2,2'-Bithiophen]-5-yl)-7-bromo-5,6-difluorobenzo[c][1,2,5]thiadiazole (3m).** 5 mol % of  $\text{Pd}(\text{TFA})_2$  was used. The product (34 mg, 40% yield) as a yellow solid was purified with silica gel chromatography (Petroleum ether (100%)). m.p. 165 °C.  $^1\text{H}$  NMR (400 MHz,  $\text{CDCl}_3$ )  $\delta$  8.18 (d,  $J = 4.0$  Hz, 1H), 7.32 (d,  $J = 3.6$  Hz, 1H), 7.30 (t,  $J = 5.2$  Hz, 2H), 7.08 (dd,  $J = 5.2$  Hz, 4.0 Hz, 1H).  $^{19}\text{F}$  NMR (376 MHz,  $\text{CDCl}_3$ )  $\delta$  -120.3 (d,  $J = 18.6$  Hz, 1F), -126.7 (d,  $J = 18.6$  Hz, 1F).  $^{13}\text{C}$  NMR (100 MHz,  $\text{CDCl}_3$ )  $\delta$  152.2 (dd,  $J = 255.0$  Hz, 20.0 Hz), 150.0 (dd,  $J = 261.2$  Hz, 19.2 Hz), 149.8, 147.7 (d,  $J = 8.3$  Hz), 141.4 (d,  $J = 5.2$  Hz), 136.6, 132.3 (d,  $J = 9.7$  Hz), 129.6(m), 128.1, 125.5, 124.6, 124.0, 113.1 (d,  $J = 15.8$  Hz), 96.8 (d,  $J = 23.4$  Hz). MS (EI):  $m/z$  (%) 416 ( $\text{M}^+$ , 100), 415 ( $\text{M}^+$ ), 414 ( $\text{M}^+$ ). HRMS: Calculated for  $\text{C}_{14}\text{H}_5\text{BrN}_2\text{S}_3\text{F}_2$ : 413.8766; Found: 413.8763.

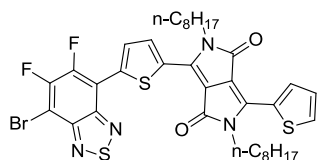

**3-(5-(7-Bromo-5,6-difluorobenzo[c][1,2,5]thiadiazol-4-yl)thiophen-2-yl)-2,5-dioctyl-6-(thiophen-2-yl)pyrrolo[3,4-c]pyrrole-1,4(2H,5H)-dione (3n).** The reaction was performed on a 0.1 mmol scale and was carried out with **1** (4 equiv), Pd(TFA)<sub>2</sub> (5 mol %), Ag<sub>2</sub>O (4 equiv) and 1.5 mL DMSO in a Schlenk tube for 10 h at 80 °C. The product (52 mg, 68% yield) as a black solid was purified with silica gel chromatography (Petroleum ether /Dichloromethane = 20:1). m.p. 145 °C. <sup>1</sup>H NMR (400 MHz, CDCl<sub>3</sub>) δ 9.06 (d, *J* = 3.2 Hz, 1H), 8.95 (d, *J* = 3.6 Hz, 1H), 8.39 (d, *J* = 4.4 Hz, 1H), 7.64 (d, *J* = 4.8 Hz, 1H), 7.27 (d, *J* = 4.8 Hz, 1H), 4.14 (t, *J* = 7.8 Hz, 2H), 4.05 (t, *J* = 8.0 Hz, 2H), 1.90-1.60 (m, 4H), 1.50-1.25 (m, 20H), 0.87 (t, *J* = 6.8 Hz, 3H), 0.85 (t, *J* = 6.8 Hz, 3H). <sup>19</sup>F NMR (376 MHz, CDCl<sub>3</sub>) δ -120.1 (d, *J* = 18.6 Hz, 1F), -124.0 (d, *J* = 18.6 Hz, 1F). MS (MALDI): *m/z* (%) 777.4 (M<sup>+</sup>), 776.4 (M<sup>+</sup>, 100), 775.4 (M<sup>+</sup>), 774.4 (M<sup>+</sup>), 773.4 (M<sup>+</sup>), 772.4 (M<sup>+</sup>). HRMS: Calculated for C<sub>36</sub>H<sub>39</sub>N<sub>4</sub>O<sub>2</sub>F<sub>2</sub>S<sub>3</sub>Br: 772.1384; Found: 772.1381.

### General procedure for the preparation of compounds 3o-3q:

To a 25 mL of sealed tube were added Pd(OAc)<sub>2</sub> (5 mol %), Ag<sub>2</sub>O (93 mg, 2.0 equiv) under N<sub>2</sub>, followed by DMSO (1 mL) with stirring. HOAc (12 uL, 1 equiv), 4-bromo-5,6-difluoro-2-octyl-2H-benzo[d][1,2,3]triazole (**4**) (0.2 mmol, 1 equiv) and thiophene (0.4 mmol, 2 equiv) were then added subsequently. The reaction mixture was stirred at 80 °C (preheated oil bath). After stirring for 8 h, the reaction mixture was cooled to room temperature, diluted with ethyl acetate, filtered, washed with brine, dried over Na<sub>2</sub>SO<sub>4</sub>, and concentrated. The residue was purified with silica gel chromatography to provide pure product

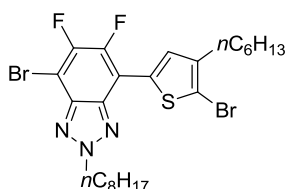

### 4-Bromo-7-(5-bromo-4-hexylthiophen-2-yl)-5,6-difluoro-2-octyl-2H-benzo[d][1,2,3]triazole (3o).

The product (76 mg, 64% yield) was purified with silica gel chromatography (Petroleum ether(100%)) as a yellow oil. <sup>1</sup>H NMR (400 MHz, CDCl<sub>3</sub>) δ 7.89 (s, 1H), 4.75 (t, *J* = 7.6 Hz, 2H),

2.64 (t,  $J = 7.6$  Hz, 2H), 2.14 (m, 2H), 1.65 (m, 2H), 1.50-1.20 (m, 16H), 0.90 (t,  $J = 7.2$  Hz, 3H), 0.87 (t,  $J = 7.2$  Hz, 3H).  $^{19}\text{F}$  NMR (376 MHz,  $\text{CDCl}_3$ )  $\delta$  -128.8 (d,  $J = 18.4$  Hz, 1F), -132.4 (d,  $J = 18.4$  Hz, 1F).  $^{13}\text{C}$  NMR (100 MHz,  $\text{CDCl}_3$ )  $\delta$  149.4 (dd,  $J = 247.8$  Hz, 18.8 Hz), 146.5 (dd,  $J = 254.2$  Hz, 18.2 Hz), 142.4, 139.6 (d,  $J = 5.5$  Hz), 136.5 (d,  $J = 8.7$  Hz), 131.2 (d,  $J = 7.0$  Hz), 131.0 (dd,  $J = 5.8$  Hz, 3.2 Hz), 113.4 (d,  $J = 9.2$  Hz), 110.8 (d,  $J = 12.8$  Hz), 93.9 (d,  $J = 22.6$  Hz), 57.2, 31.7, 31.6, 30.0, 29.7, 29.5, 29.0, 28.9, 28.88, 26.5, 22.6, 22.59, 14.1, 14.0. MS (MALDI):  $m/z$  (%) 592.0 ( $\text{M}^+ - \text{H}$ ), 590.0 ( $\text{M}^+ - \text{H}$ ), 588.0 ( $\text{M}^+ - \text{H}$ ). HRMS: Calculated for  $\text{C}_{24}\text{H}_{30}\text{N}_3\text{F}_2\text{SBr}_2$ : 588.0490; Found: 588.0490.

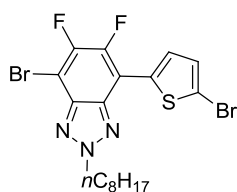

**4-Bromo-7-(5-bromothiophen-2-yl)-5,6-difluoro-2-octyl-2H-benzo[d][1,2,3]triazole (3p).** The product (53 mg, 52% yield) was purified with silica gel chromatography (Petroleum ether(100%)) as yellow solid. m.p. 65 °C.  $^1\text{H}$  NMR (400 MHz,  $\text{CDCl}_3$ )  $\delta$  7.98 (d,  $J = 4.0$  Hz, 1H), 7.15 (dd,  $J = 4.0$  Hz, 1.2 Hz, 1H), 4.75 (t,  $J = 7.4$  Hz, 2H), 2.14 (m, 2H), 1.50-1.20 (m, 10H), 0.87 (t,  $J = 6.8$  Hz, 3H).  $^{19}\text{F}$  NMR (282 MHz,  $\text{CDCl}_3$ )  $\delta$  -129.1 (d,  $J = 18.8$  Hz, 1F), -132.5 (d,  $J = 18.8$  Hz, 1F).  $^{13}\text{C}$  NMR (100 MHz,  $\text{CDCl}_3$ )  $\delta$  149.3 (dd,  $J = 259.0$  Hz, 18.7 Hz), 146.8 (dd,  $J = 265.4$  Hz, 18.8 Hz), 139.6 (d,  $J = 5.5$  Hz), 136.4 (d,  $J = 8.6$  Hz), 133.0 (dd,  $J = 6.0$  Hz, 3.2 Hz), 130.6 (d,  $J = 6.8$  Hz), 130.2, 116.2 (d,  $J = 9.3$  Hz), 110.6 (d,  $J = 12.7$  Hz), 94.3 (d,  $J = 22.9$  Hz), 57.2, 31.7, 30.0, 29.0, 28.9, 26.5, 22.6, 14.0. MS (MALDI):  $m/z$  (%) 508.0( $\text{M}^+ - \text{H}$ ), 507.0 ( $\text{M}^+ - \text{H}$ ), 506.0 ( $\text{M}^+ - \text{H}$ ), 504.0 ( $\text{M} - \text{H}$ ). HRMS: Calculated for  $\text{C}_{18}\text{H}_{18}\text{N}_3\text{F}_2\text{SBr}_2$ : 503.9551; Found: 503.9561.

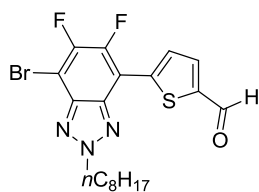

**5-(7-Bromo-5,6-difluoro-2-octyl-2H-benzo[d][1,2,3]triazol-4-yl)thiophene-2-carbaldehyde (3q).** The product (56 mg, 62% yield) was purified with silica gel chromatography (Petroleum ether/ Ethyl acetate(100:1)) as yellow solid. m.p. 71 °C.  $^1\text{H}$  NMR (300 MHz,  $\text{CDCl}_3$ )  $\delta$  10.00 (s, 1H), 8.28 (d,  $J =$

4.2 Hz, 1H), 7.83 (dd,  $J = 4.0$  Hz, 1.6 Hz, 1H), 4.77 (t,  $J = 7.4$  Hz, 2H), 2.15 (m, 2H), 1.45-1.20 (m, 10H), 0.85 (t,  $J = 6.6$  Hz, 3H).  $^{19}\text{F}$  NMR (282 MHz,  $\text{CDCl}_3$ )  $\delta$  -128.7 (d,  $J = 19.7$  Hz, 1F), -129.2 (d,  $J = 19.7$  Hz, 1F).  $^{13}\text{C}$  NMR (100 MHz,  $\text{CDCl}_3$ )  $\delta$  183.1, 149.0 (dd,  $J = 251.0$  Hz, 15.1 Hz), 147.7 (dd,  $J = 256.9$  Hz, 17.5 Hz), 144.5 (d,  $J = 6.8$  Hz), 140.4 (m), 139.6 (d,  $J = 4.4$  Hz), 136.5 (d,  $J = 8.2$  Hz), 135.8, 130.8 (d,  $J = 7.1$  Hz), 110.1 (d,  $J = 12.6$  Hz), 96.8 (d,  $J = 22.5$  Hz), 57.4, 31.6, 30.0, 29.0, 28.9, 26.4, 22.5, 14.0. MS (EI):  $m/z$  (%) 457 ( $\text{M}^+$ ), 455 ( $\text{M}^+$ ), 376, 208 (100). HRMS: Calculated for  $\text{C}_{19}\text{H}_{20}\text{ON}_3\text{S}_2\text{F}_2\text{Br}$ : 455.0479; Found: 455.0475.

### General procedure for the preparation of compounds 6a and 6b

To a 25 mL of sealed tube were added  $\text{Pd}(\text{TFA})_2$  (5 mol %),  $\text{Ag}_2\text{O}$  (186 mg 4.0 equiv) and **5** (0.2 mmol, 1 equiv) under  $\text{N}_2$ , followed by DMSO (1 mL) with stirring. Thiophene (0.8 mmol, 4 equiv) was then added. The reaction mixture was stirred at 80 °C (preheated oil bath). After stirring for 10 h, the reaction mixture was cooled to room temperature, diluted with dichloromethane, filtered, washed with brine, dried over  $\text{Na}_2\text{SO}_4$ , and concentrated. The residue was purified with silica gel chromatography (Petroleum ether (100%)) to provide pure product

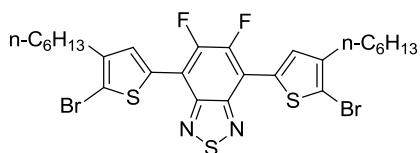

**4,7-bis(5-bromo-4-hexylthiophen-2-yl)-5,6-difluorobenzo[c][1,2,5]thiadiazole (6a).** The product (90 mg, 68%) was purified with silica gel chromatography (Petroleum ether(100%)) as a red solid. 17% of **7a** (14 mg) was also isolated. **6a**: m.p. 101.1 °C. This is known compound.<sup>3</sup>  $^1\text{H}$  NMR (400 MHz,  $\text{CDCl}_3$ )  $\delta$  7.94 (s, 2H), 2.65 (t,  $J = 7.6$  Hz, 4H), 1.66 (m, 4H), 1.45-1.27 (m, 12H), 0.90 (t,  $J = 6.8$  Hz, 6H).  $^{19}\text{F}$  NMR (376 MHz,  $\text{CDCl}_3$ )  $\delta$  -118.1 (s, 2F).  $^{13}\text{C}$  NMR (100 MHz,  $\text{CDCl}_3$ )  $\delta$  149.5 (dd,  $J = 259.1$  Hz, 20.3 Hz), 148.1 (t,  $J = 4.1$  Hz), 142.5, 131.5 (t,  $J = 4.8$  Hz), 131.1, 114.4 (t,  $J = 3.6$  Hz), 110.7 (m), 31.6, 29.7, 29.5, 29.0, 22.6, 14.1. MS (MALDI):  $m/z$  (%) 664.0 ( $\text{M}^+$ ), 662.0 ( $\text{M}^+$ ), 660.0 ( $\text{M}^+$ ). HRMS: Calculated for  $\text{C}_{26}\text{H}_{28}\text{Br}_2\text{F}_2\text{N}_2\text{S}_3$ : 659.9749; Found: 659.9751.

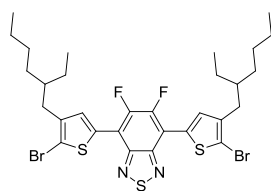

**4,4'-(5,5'-(5,6-difluorobenzo[c][1,2,5]thiadiazole-4,7-diyl)bis(3-hexylthiophene-5,2-diyl))bis(N,N-diphenylaniline) (6b).** The product (95 mg, 66%) was purified with silica gel chromatography (Petroleum ether (100%)) as a red solid. This is known compound.<sup>4</sup> 11% of **7b** (10 mg) was also isolated. **6b**: m.p. 83 °C. <sup>1</sup>H NMR (400 MHz, CDCl<sub>3</sub>) δ 7.85 (s, 2H), 2.56 (d, *J* = 7.6 Hz, 4H), 1.69 (m, 2H), 1.45-1.25(m, 16H), 0.93(t, *J* = 7.8 Hz, 12H). <sup>19</sup>F NMR (376 MHz, CDCl<sub>3</sub>) δ -128.0 (s, 2F). <sup>13</sup>C NMR (100 MHz, CDCl<sub>3</sub>) δ 152.0 (dd, *J* = 258.9 Hz, 20.0 Hz), 148.1 (m), 141.6, 132.1 (t, *J* = 4.7 Hz), 131.0, 115.1 (t, *J* = 3.6 Hz), 110.7 (m), 39.9, 33.7, 32.4, 28.8, 25.7, 23.1, 14.2, 10.8.

#### General procedure for the preparation of compounds **7a** and **7c-e**.

To a 25 mL of sealed tube were added Pd(TFA)<sub>2</sub> (2.5 mol %), Ag<sub>2</sub>O (2.0 equiv) and **5** (3.0 equiv) under N<sub>2</sub>, followed by DMSO with stirring. Thiophene (1 equiv) was then added. The reaction mixture was stirred at 80 °C (preheated oil bath). After stirring for 10 h, the reaction mixture was cooled to room temperature, diluted with dichloromethane, filtered, washed with brine, dried over Na<sub>2</sub>SO<sub>4</sub>, and concentrated. The residue was purified with silica gel chromatography to provide pure product

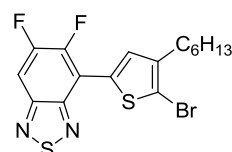

**4-(5-Bromo-4-hexylthiophen-2-yl)-5,6-difluorobenzo[c][1,2,5]thiadiazole (7a).** The reaction was performed on a 2 mmol scale in 6 mL DMSO. The product (590 mg, 71%) was purified with silica gel chromatography (Petroleum ether (100%)) as a yellow solid. 22% yield of **6a** (147 mg) was also isolated. **7a**: m.p. 69 °C. <sup>1</sup>H NMR (400 MHz, CDCl<sub>3</sub>) δ 7.94 (s, 1H), 7.60 (dd, *J* = 9.0 Hz, 7.8 Hz, 1H), 2.65 (t, *J* = 7.6 Hz, 2H), 1.66 (m, 2H), 1.45-1.27 (m, 6H), 0.90 (t, *J* = 6.8 Hz, 3H). <sup>19</sup>F NMR (376 MHz, CDCl<sub>3</sub>) δ -127.1 (dd, *J* = 17.1 Hz, 8.8 Hz, 1F), -128.7 (dd, *J* = 16.9 Hz, 7.5 Hz, 1F). <sup>13</sup>C NMR (100 MHz, CDCl<sub>3</sub>) δ 152.4 (dd, *J* = 256.2 Hz, 18.8 Hz), 150.4 (d, *J* = 11.6 Hz), 149.1 (dd, *J* = 260.0 Hz, 19.3 Hz), 148.7 (d, *J* = 8.2 Hz), 142.5, 132.0 (d, *J* = 9.9 Hz), 131.0 (m), 114.4 (d, *J* = 8.3

Hz), 113.3 (d,  $J = 11.2$  Hz), 103.6 (d,  $J = 20.2$  Hz), 31.6, 29.7, 29.5, 28.9, 22.6, 14.1. MS (EI):  $m/z$  (%) 418 ( $M^+$ ), 416 ( $M^+$ ), 267(100). HRMS: Calculated for  $C_{16}H_{15}N_2F_2S_2Br$ : 415.9828; Found: 415.9832.

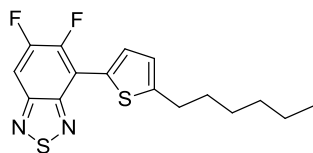

**5,6-Difluoro-4-(5-hexylthiophen-2-yl)benzo[c][1,2,5]thiadiazole (7c).** The reaction was performed on a 1.0 mmol scale in 2.5 mL of DMSO. The product (161 mg, 48% yield) was purified with silica gel chromatography (Petroleum ether (100%)) as a yellow oil. 4% yield of **6c** (10 mg) was also isolated. **7c**:  $^1H$  NMR (400 MHz,  $CDCl_3$ )  $\delta$  8.03 (d,  $J = 2.8$  Hz, 1H), 7.49 (apparent t,  $J = 8.2$  Hz, 1H), 6.88 (d,  $J = 2.8$  Hz, 1H), 2.88 (t,  $J = 7.6$  Hz, 2H), 1.75 (m, 2H), 1.50-1.25 (m, 6H), 0.90 (t,  $J = 7.0$  Hz, 3H).  $^{19}F$  NMR (376 MHz,  $CDCl_3$ ) -127.3 (dd,  $J = 17.1$  Hz, 8.8 Hz, 1F), -129.7 (dd,  $J = 16.9$  Hz, 7.5 Hz, 1F).  $^{13}C$  NMR (125 MHz,  $CDCl_3$ )  $\delta$  152.4 (dd,  $J = 255.6$  Hz, 19.0 Hz), 150.4 (d,  $J = 12.6$  Hz), 150.1 (d,  $J = 5.3$  Hz), 149.0 (d,  $J = 8.5$  Hz), 148.5 (dd,  $J = 258.5$  Hz, 19.1 Hz), 131.2, 128.6 (dd,  $J = 5.6$  Hz, 3.6 Hz), 124.5, 114.2 (d,  $J = 13.0$  Hz), 102.8 (d,  $J = 20.4$  Hz), 31.5, 31.4, 30.0, 28.8, 22.5, 14.0. MS (EI):  $m/z$  (%) 338 ( $M^+$ ), 267 (100), 141. HRMS: Calculated for  $C_{16}H_{16}N_2S_2F_2$ : 338.0723; Found: 338.0724.

### General Procedure for the preparation of compounds 9a-d.

To a 25 mL of sealed tube were added  $Pd(OAc)_2$  (5 mol %),  $AgOAc$  (133 mg 4.0 equiv), **8** (0.6 mmol, 3 equiv) under  $N_2$ , followed by DMSO (2 mL) with stirring. 2-Methylpyridine (30  $\mu$ L 1.5equiv), and thiophene (0.2 mmol, 1 equiv) were then added. The reaction mixture was stirred at 80  $^{\circ}C$  (oil bath). After stirring for 9 h, the reaction mixture was cooled to room temperature, diluted with dichloromethane, filtered, washed with brine, dried over  $Na_2SO_4$ , and concentrated. The residue was purified with silica gel chromatography (Petroleum ether (100%)) to provide pure product.

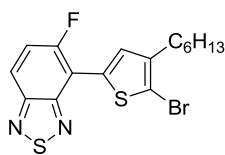

**4-(5-Bromo-4-hexylthiophen-2-yl)-5-fluorobenzo[c][1,2,5]thiadiazole (9a).** The product (34 mg, 42% yield) was purified with silica gel chromatography (Petroleum ether(100%)) as a yellow solid.  $^1\text{H}$  NMR (400 MHz,  $\text{CDCl}_3$ )  $\delta$  7.96 (s, 1H), 7.85 (dd,  $J$  = 9.4 Hz, 5.0 Hz, 1H), 7.51 (dd,  $J$  = 11.4 Hz, 9.4 Hz, 1H), 2.65 (t,  $J$  = 7.6 Hz, 2H), 1.66 (m, 2H), 1.45-1.30 (m, 6H), 0.90 (t,  $J$  = 7.0 Hz, 3H).  $^{19}\text{F}$  NMR (376 MHz,  $\text{CDCl}_3$ )  $\delta$  -108.3 (dd,  $J$  = 11.5 Hz, 4.7 Hz, 1F).  $^{13}\text{C}$  NMR (100 MHz,  $\text{CDCl}_3$ )  $\delta$  158.6 (d,  $J$  = 254.9 Hz), 152.5 (d,  $J$  = 10.4 Hz), 152.3, 142.2, 131.9 (d,  $J$  = 5.4 Hz), 131.2 (d,  $J$  = 8.9 Hz), 121.9 (d,  $J$  = 30.9 Hz), 120.0 (d,  $J$  = 10.9 Hz), 113.1 (d,  $J$  = 8.5 Hz), 112.2 (d,  $J$  = 14.6 Hz), 31.6, 29.8, 29.6, 28.9, 22.6, 14.1. MS (EI):  $m/z$  (%) 398 ( $\text{M}^+$ ), 249 (100). HRMS: Calculated for  $\text{C}_{16}\text{H}_{16}\text{N}_2\text{FS}_2\text{Br}$ : 397.9922; Found: 397.9923.

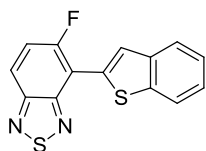

**4-(Benzo[b]thiophen-2-yl)-5-fluorobenzo[c][1,2,5]thiadiazole (9b).** The product (26 mg, 45% yield) was purified with silica gel chromatography (Petroleum ether(100%)) as a yellow solid.  $^1\text{H}$  NMR (400 MHz,  $\text{CDCl}_3$ )  $\delta$  8.52 (s, 1H), 7.85 (dd,  $J$  = 9.0 Hz, 4.8 Hz, 1H), 7.92 (m, 2H), 7.59 (dd,  $J$  = 11.4 Hz, 9.0 Hz, 1H), 7.41 (m, 2H).  $^{19}\text{F}$  NMR (376 MHz,  $\text{CDCl}_3$ )  $\delta$  -107.2 (dd,  $J$  = 11.6 Hz, 4.5 Hz, 1F).  $^{13}\text{C}$  NMR (125.7 MHz,  $\text{CDCl}_3$ )  $\delta$  159.5 (d,  $J$  = 256.1 Hz), 153.1 (d,  $J$  = 9.9 Hz), 152.4, 140.6 (d,  $J$  = 6.1 Hz), 139.2, 132.3 (d,  $J$  = 5.4 Hz), 127.4 (d,  $J$  = 7.8 Hz), 125.1, 124.5, 124.2, 121.9 (d,  $J$  = 31.0 Hz), 121.8, 121.0 (d,  $J$  = 11.1 Hz), 112.8 (d,  $J$  = 14.8 Hz). MS (EI):  $m/z$  (%) 286 ( $\text{M}^+$ , 100), 109. HRMS: Calculated for  $\text{C}_{14}\text{H}_7\text{N}_2\text{FS}_2$ : 286.0035; Found: 286.0040.

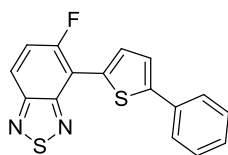

**5-Fluoro-4-(5-phenylthiophen-2-yl)benzo[c][1,2,5]thiadiazole (9c).** The product (29 mg, 47% yield) was purified with silica gel chromatography (Petroleum ether(100%)) as a yellow solid.  $^1\text{H}$  NMR (400 MHz,  $\text{CDCl}_3$ )  $\delta$  8.25 (d,  $J$  = 4.0 Hz, 1H), 7.85 (dd,  $J$  = 9.4 Hz, 4.6 Hz, 1H), 7.72 (d,  $J$  = 7.2 Hz, 2H), 7.54 (dd,  $J$  = 11.2 Hz, 9.2 Hz, 1H), 7.46-7.38 (m, 3H), 7.32 (t,  $J$  = 7.4 Hz, 1H).  $^{19}\text{F}$  NMR (376 MHz,  $\text{CDCl}_3$ )  $\delta$  -108.3 (dd,  $J$  = 11.6 Hz, 4.9 Hz, 1F).  $^{13}\text{C}$  NMR (125 MHz,  $\text{CDCl}_3$ )  $\delta$



158.6 (d,  $J = 254.6$  Hz), 152.8 (d,  $J = 10.2$  Hz), 152.4, 146.6 (d,  $J = 6.9$  Hz), 140.0, 131.6 (d,  $J = 5.6$  Hz), 131.5 (d,  $J = 8.4$  Hz), 128.9, 125.9, 123.3, 122.0, 121.8, 119.8 (d,  $J = 11.0$  Hz), 112.8 (d,  $J = 14.9$  Hz). MS (EI):  $m/z$  (%) 312 ( $M^+$ , 100), 121. HRMS: Calculated for  $C_{16}H_9N_2FS_2$ : 312.0191; Found: 312.0190.

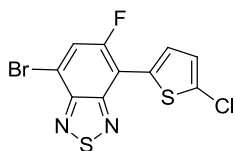

**7-Bromo-4-(5-chlorothiophen-2-yl)-5-fluorobenzo[c][1,2,5]thiadiazole (9d).** The product (30 mg, 43% yield) as a yellow solid was purified with silica gel chromatography (Petroleum ether(100%)).  $^1H$  NMR (400 MHz,  $CDCl_3$ )  $\delta$  8.01 (d,  $J = 4.0$  Hz, 1H), 7.80 (d,  $J = 11.2$  Hz, 1H), 7.04 (dd,  $J = 4.4$  Hz, 1.2 Hz, 1H).  $^{19}F$  NMR (376 MHz,  $CDCl_3$ )  $\delta$  -107.8 (d,  $J = 10.9$  Hz, 1F).  $^{13}C$  NMR (100 MHz,  $CDCl_3$ )  $\delta$  158.1 (d,  $J = 257.1$  Hz), 151.6 (d,  $J = 12.1$  Hz), 151.0, 133.7 (d,  $J = 8.7$  Hz), 130.5 (d,  $J = 5.8$  Hz), 130.0 (d,  $J = 9.5$  Hz), 126.5, 124.4 (d,  $J = 33.2$  Hz), 112.2 (d,  $J = 12.6$  Hz), 111.6 (d,  $J = 14.1$  Hz). MS (EI):  $m/z$  (%) 398 ( $M^+$ ), 249 (100). HRMS: Calculated for  $C_{10}H_3N_2FS_2BrCl$ : 347.8594; Found: 347.8596.

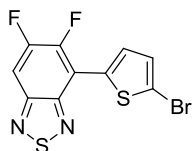

**4-(5-Bromothiophen-2-yl)-5,6-difluorobenzo[c][1,2,5]thiadiazole (7d).** The reaction was performed on a 4.0 mmol scale in 4 mL DMSO. The product (916 mg, 69%) was purified with silica gel chromatography (Petroleum ether (100%)) as a yellow solid.  $^1H$  NMR (400 MHz,  $CDCl_3$ )  $\delta$  8.01 (d,  $J = 4.0$  Hz, 1H), 7.64 (dd,  $J = 9.0$  Hz, 7.4 Hz, 1H), 7.20 (dd,  $J = 4.2$  Hz, 1.0 Hz, 1H).  $^{19}F$  NMR (376 MHz,  $CDCl_3$ )  $\delta$  -127.1 (dd,  $J = 12.6$  Hz, 9.6 Hz, 1F), -128.5 (dd,  $J = 16.2$  Hz, 6.8 Hz, 1F).  $^{13}C$  NMR (100 MHz,  $CDCl_3$ )  $\delta$  152.4 (dd,  $J = 256.4$  Hz, 18.8 Hz), 150.4 (d,  $J = 12.5$  Hz), 149.1 (dd,  $J = 260.2$  Hz, 19.4 Hz), 148.7 (d,  $J = 8.3$  Hz), 133.0 (m), 131.4 (d,  $J = 10.1$  Hz), 130.2 (d,  $J = 0.9$  Hz), 117.3 (d,  $J = 7.9$  Hz), 113.1 (m), 104.0 (d,  $J = 21.2$  Hz). MS (EI):  $m/z$  (%) 334 ( $M^+$ , 100), 332 ( $M^+$ , 100), 253, 209. HRMS: Calculated for  $C_{10}H_3N_2F_2S_2Br$ : 331.8889; Found: 331.8893.

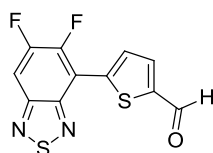

**5-(5,6-difluorobenzo[c][1,2,5]thiadiazol-4-yl)thiophene-2-carbaldehyde (7e).** The reaction was performed on a 1 mmol scale in 3 mL DMSO. The product (130 mg, 46% yield) was purified with silica gel chromatography (Petroleum ether /Dichloromethane = 40:1) as a yellow solid. m.p. 157 °C;  $^1\text{H}$  NMR (400 MHz,  $\text{CDCl}_3$ )  $\delta$  10.04 (s, 1H), 8.34 (d,  $J$  = 4.0 Hz, 1H), 7.89 (dd,  $J$  = 3.6 Hz, 1.2 Hz, 1H), 7.77 (dd,  $J$  = 8.8 Hz, 7.6 Hz, 1H).  $^{19}\text{F}$  NMR (376 MHz,  $\text{CDCl}_3$ )  $\delta$  -125.3 (dd,  $J$  = 16.4 Hz, 8.1 Hz, 1F), -126.8 (dd,  $J$  = 16.9 Hz, 9.0 Hz, 1F).  $^{13}\text{C}$  NMR (100 MHz,  $\text{CDCl}_3$ )  $\delta$  183.2, 153.8 (dd,  $J$  = 257.2 Hz, 18.8 Hz), 150.5 (dd,  $J$  = 263.4 Hz, 19.4 Hz), 150.4 (d,  $J$  = 12.1 Hz), 148.7 (d,  $J$  = 7.4 Hz), 145.1 (d,  $J$  = 5.7 Hz), 140.2 (m), 135.5 (d,  $J$  = 7.9 Hz), 131.6 (d,  $J$  = 9.2 Hz), 112.8 (d,  $J$  = 10.6 Hz), 105.8 (d,  $J$  = 20.0 Hz). MS (EI):  $m/z$  (%) 282 ( $\text{M}^+$ , 100), 281, 209. HRMS: Calculated for  $\text{C}_{11}\text{H}_4\text{N}_2\text{F}_2\text{OS}_2$ : 281.9733; Found: 281.9738.

#### General procedure for the preparation of compounds 11 and 12.

To a 25 mL of sealed tube were added  $\text{Pd}(\text{TFA})_2$  (5 mol %),  $\text{Ag}_2\text{O}$  (93 mg 2.0 equiv), **7** (0.2 mmol, 1 equiv) under  $\text{N}_2$ , followed by DMSO (1 mL) with stirring. **10** (0.3 mmol, 1.5 equiv) was then added. The reaction mixture was stirred at 80 °C (preheated oil bath). After stirring for 7 h, the reaction mixture was cooled to room temperature, diluted with dichloromethane, filtered, washed with brine, dried over  $\text{Na}_2\text{SO}_4$ , and concentrated. The residue was purified with silica gel chromatography to provide pure product.

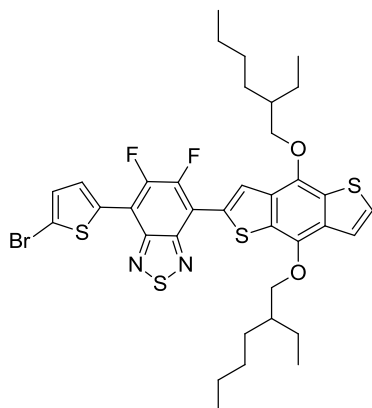

**4-(4,8-Bis(octyloxy)benzo[1,2-b:4,5-b']dithiophen-2-yl)-7-(5-bromothiophen-2-yl)-5,6-difluorobenzo[c][1,2,5]thiadiazole (11).** The product (86 mg, 55% yield) as a dark brown solid was purified with silica gel chromatography (Petroleum ether/dichloromethane = 40:1). m.p. 112 °C.  $^1\text{H}$  NMR (400 MHz,  $\text{CDCl}_3$ )  $\delta$  8.60 (s, 1H), 7.89 (d,  $J = 3.6$  Hz, 1H), 7.35 (dd,  $J = 13.0$  Hz, 1.4 Hz, 2H), 7.09 (d,  $J = 4.0$  Hz, 1H), 4.21 (d,  $J = 4.0$  Hz, 2H), 4.15 (d,  $J = 4.8$  Hz, 2H), 1.90-1.35 (m, 18H), 1.09 (t,  $J = 7.2$  Hz, 3H), 1.06 (t,  $J = 7.2$  Hz, 3H), 0.99 (m, 6H).  $^{19}\text{F}$  NMR (376 MHz,  $\text{CDCl}_3$ )  $\delta$  -126.3 (d,  $J = 14.8$  Hz, 1F), -127.8 (d,  $J = 14.8$  Hz, 1F).  $^{13}\text{C}$  NMR (100 MHz,  $\text{CDCl}_3$ )  $\delta$  150.4 (dd,  $J = 260.4$  Hz, 19.8 Hz), 149.6 (dd,  $J = 257.8$  Hz, 20.2 Hz), 148.5 (d,  $J = 12.0$  Hz), 148.1 (d,  $J = 9.5$  Hz), 145.2, 143.8, 133.2 (m), 132.6, 131.1 (d,  $J = 10.8$  Hz), 130.9, 130.8, 130.2 (d,  $J = 6.7$  Hz), 130.1, 126.6, 124.6 (d,  $J = 9.2$  Hz), 120.3, 117.3 (d,  $J = 8.1$  Hz), 110.7 (d,  $J = 11.2$  Hz), 111.6 (d,  $J = 11.4$  Hz), 111.2 (d,  $J = 10.6$  Hz), 75.9, 75.7, 40.73, 40.69, 30.6, 30.5, 29.3, 29.26, 23.9, 23.87, 23.2, 14.2, 11.5, 11.4. MS (MALDI):  $m/z$  (%) 780.1 ( $\text{M}^+$ ), 779.1 ( $\text{M}^+$ ), 778.1 ( $\text{M}^+$ ), 776.1 ( $\text{M}^+$ ), 553.9 (100). HRMS: Calculated for  $\text{C}_{36}\text{H}_{39}\text{N}_2\text{O}_2\text{F}_2\text{S}_4\text{Br}$ : 776.1040; Found: 776.1039.

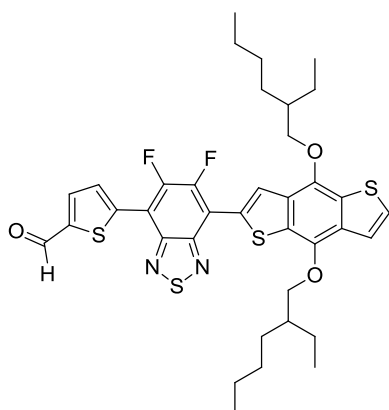

**5-(7-(4,8-Bis(octyloxy)benzo[1,2-b:4,5-b']dithiophen-2-yl)-5,6-difluorobenzo[c][1,2,5]thiadiazol-4-yl)thiophene-2-carbaldehyde (12).** The product (89 mg, 61% yield) as a dark brown solid was purified with silica gel chromatography (Petroleum ether/Dichloromethane=20:1). m.p. 164 °C.  $^1\text{H}$  NMR (300 MHz,  $\text{CDCl}_3$ )  $\delta$  9.97 (s, 1H), 8.68 (s, 1H), 8.25 (d,  $J = 4.2$  Hz, 1H), 7.78 (d,  $J = 3.6$  Hz, 1H), 7.36 (d,  $J = 4.2$  Hz, 2H), 4.20 (d,  $J = 14.1$  Hz, 4H), 1.90-1.30 (m, 18H), 1.09 (t,  $J = 7.5$  Hz, 3H), 1.06 (t,  $J = 7.2$  Hz, 3H), 0.98 (m, 6H).  $^{19}\text{F}$  NMR (282 MHz,  $\text{CDCl}_3$ )  $\delta$  -124.4 (d,  $J = 14.7$  Hz, 1F), -126.3 (d,  $J = 14.7$  Hz, 1F).  $^{13}\text{C}$  NMR (100 MHz,  $\text{CDCl}_3$ )  $\delta$  183.0, 150.9 (dd,  $J = 261.7$  Hz, 19.6 Hz), 150.0 (dd,  $J = 260.5$  Hz, 19.1 Hz), 148.4 (d,  $J = 9.1$  Hz), 148.2 (d,  $J = 8.4$  Hz), 145.4, 144.6 (d,  $J = 5.9$  Hz), 143.8, 140.3, 135.2, 132.8, 131.2 (d,  $J = 9.4$  Hz), 130.7, 130.5, 130.3, 129.8, 126.9, 125.3 (d,

$J = 9.4$  Hz), 120.3, 113.2 (d,  $J = 10.9$  Hz), 110.7 (d,  $J = 11.2$  Hz), 75.9, 75.8, 40.7, 40.68, 30.6, 30.5, 29.3, 29.26, 23.9, 23.87, 23.2, 14.2, 11.5, 11.4. MS (MALDI):  $m/z$  (%) 728.2 ( $M^+ + H$ ), 727.2 ( $M^+ + H$ ). HRMS: Calculated for  $C_{37}H_{40}N_2O_3F_2N_2S_4$ : 726.1890; Found: 727.1946.

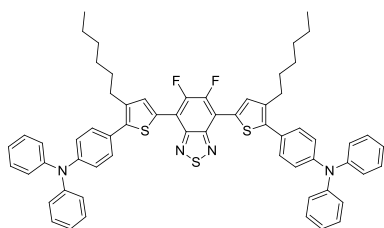

**4,4'-(5,5'-(5,6-difluorobenzo[c][1,2,5]thiadiazole-4,7-diyl)bis(3-hexylthiophene-5,2-diyl))bis(N,N-diphenylaniline) (14).** To a 25 mL of sealed tube were added **6a** (0.1 mmol, 1.0 equiv), (4-(diphenylamino)phenyl)boronic acid (73 mg, 2.5 equiv),  $Pd(PPh_3)_4$  (2 mol %),  $K_2CO_3$  (55 mg 4.0 equiv) under  $N_2$ , followed by DMF (2 mL),  $H_2O$  (400  $\mu$ L) with stirring. The reaction mixture was stirred at 110  $^{\circ}C$  (oil bath). After stirring for 10 h, the reaction mixture was cooled to room temperature, diluted with dichloromethane, filtered, washed with brine, dried over  $Na_2SO_4$ , and concentrated. The residue was purified with silica gel chromatography (Petroleum ether (100%)) to provide pure product (95 mg, 96%) as a red solid.  $^1H$  NMR (400 MHz,  $CDCl_3$ )  $\delta$  8.14 (s, 2H), 7.40 (d,  $J = 8.8$  Hz, 4H), 7.30 (t,  $J = 7.6$  Hz, 8H), 7.20-7.10 (m, 12H), 7.06 (t,  $J = 7.2$  Hz, 4H), 2.77 (t,  $J = 7.8$  Hz, 4H), 1.71 (m, 4H), 1.45-1.25(m, 12H), 0.90(t,  $J = 5.8$  Hz, 6H).  $^{19}F$  NMR (376 MHz,  $CDCl_3$ )  $\delta$  -128.6 (s, 2F).  $^{13}C$  NMR (100 MHz,  $CDCl_3$ )  $\delta$  149.7 (dd,  $J = 258.5$  Hz, 20.2 Hz), 148.8 (t,  $J = 4.1$  Hz), 147.4, 147.38, 141.7, 138.7, 133.5, 129.9, 129.3, 129.1, 127.7, 124.7, 123.2, 122.9, 111.2 (m), 31.6, 31.0, 29.2, 28.8, 22.6, 14.1. MS (MALDI):  $m/z$  (%) 993.4 ( $M^+$ ), 992.4 ( $M^+$ ), 991.4 ( $M^+$ ), 990.4 ( $M^+$ , 100). HRMS: Calculated for  $C_{62}H_{56}N_4F_2S_3$ : 990.36297; Found: 990.3618.

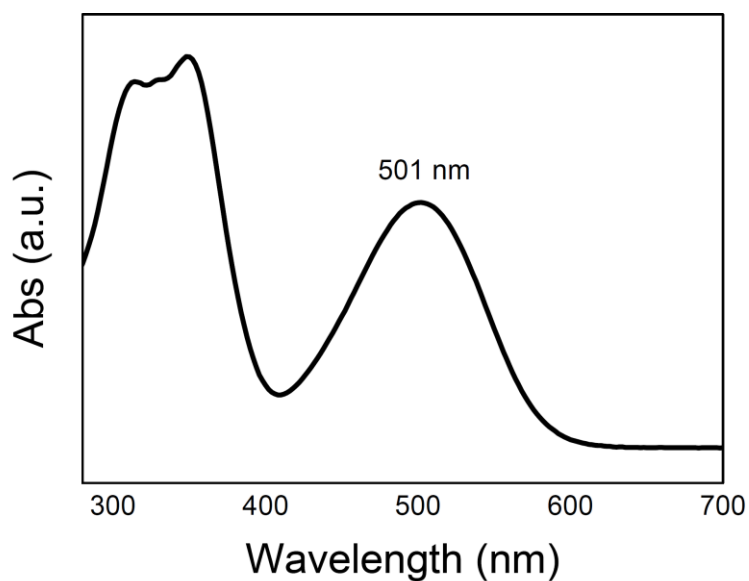

**Figure S1:** UV-vis absorption spectra of **14** in chloroform.

**References:**

- (1) a) Krikura, T.; Ishizaki, T.; Hirai, K.; Murayama, S.; Suzue, S. US Patent US4791225 A1, 1988.
- (2) Weber, E.; Keana, J. F. W. US5514680 A1, 1996.
- (3) Wang, N.; Chen, Z.; Wei, W.; Jiang, Z. *J. Am. Chem. Soc.* **2013**, DOI: 10.1021/ja409881g.
- (4) Zhou, H; Stuart, A.C.; Price, S.C.; You, W; Yang, L; Liu, S. *Angew. Chem., Int. Ed.* **2011**, *50*, 2995 – 2998.

4-Bromo-5,6-difluorobenzo[c][1,2,5]thiadiazole (1).

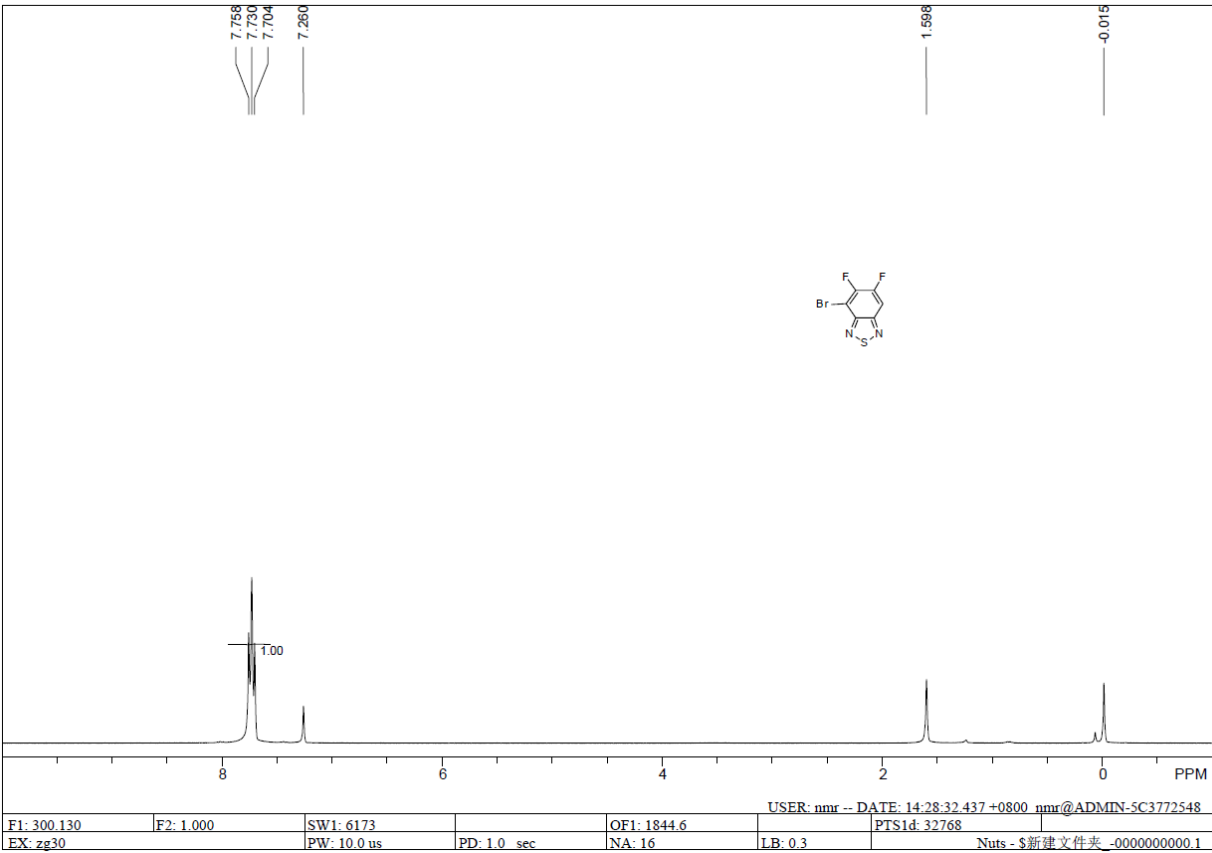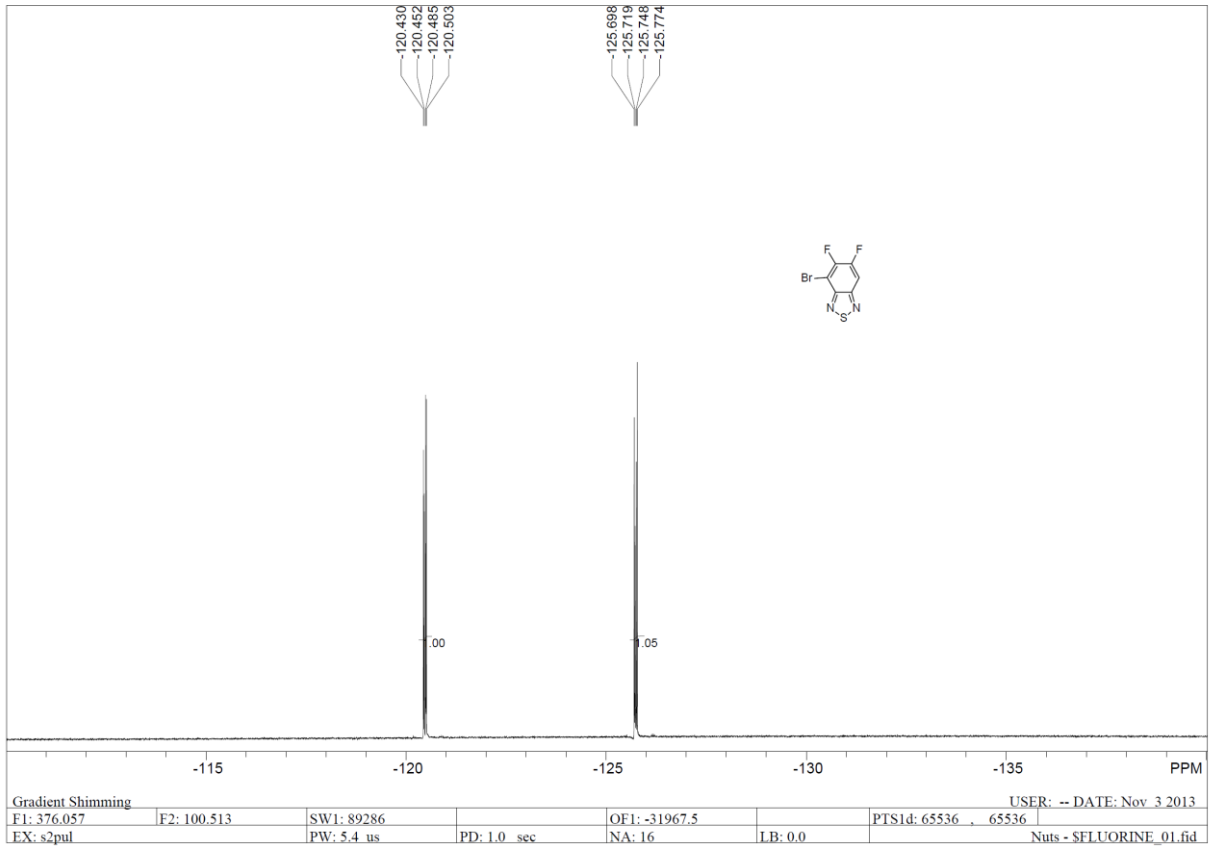

4-Bromo-5,6-difluoro-2-octyl-2H-benzo[d][1,2,3]triazole(4).

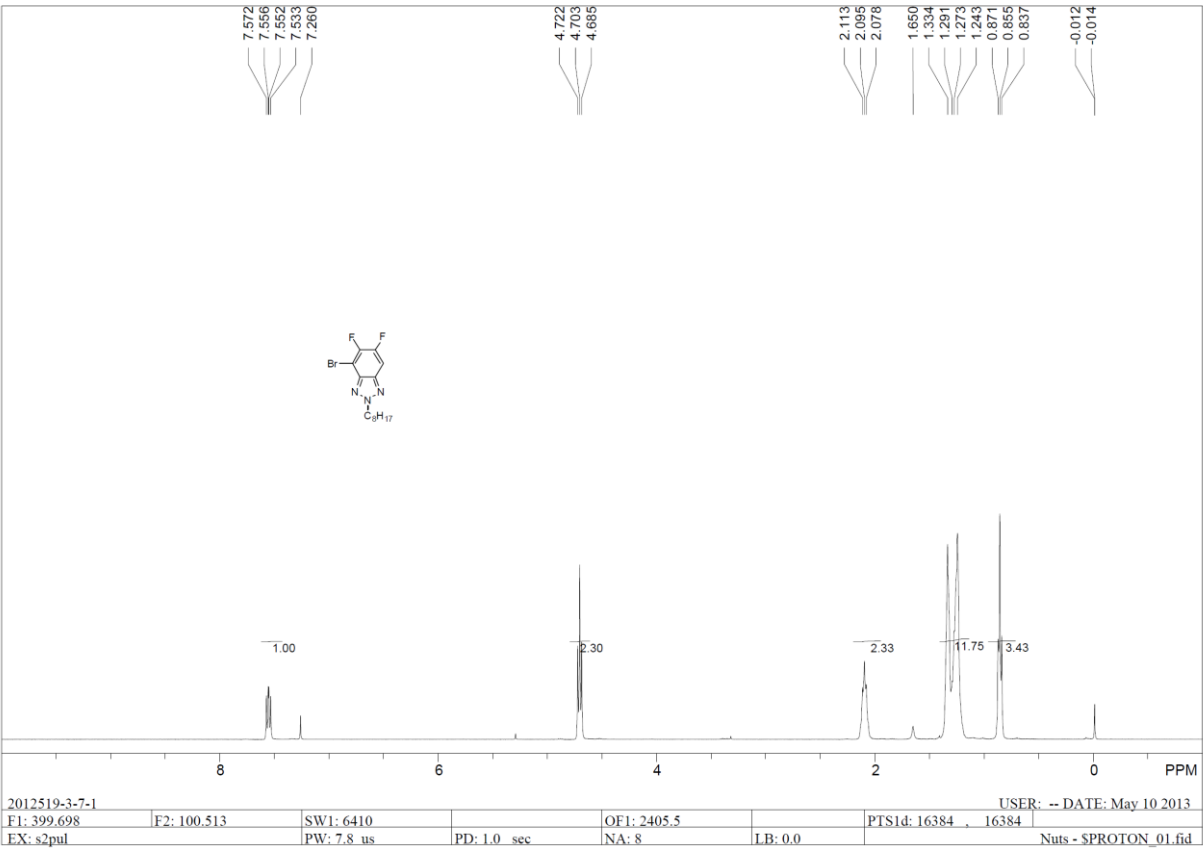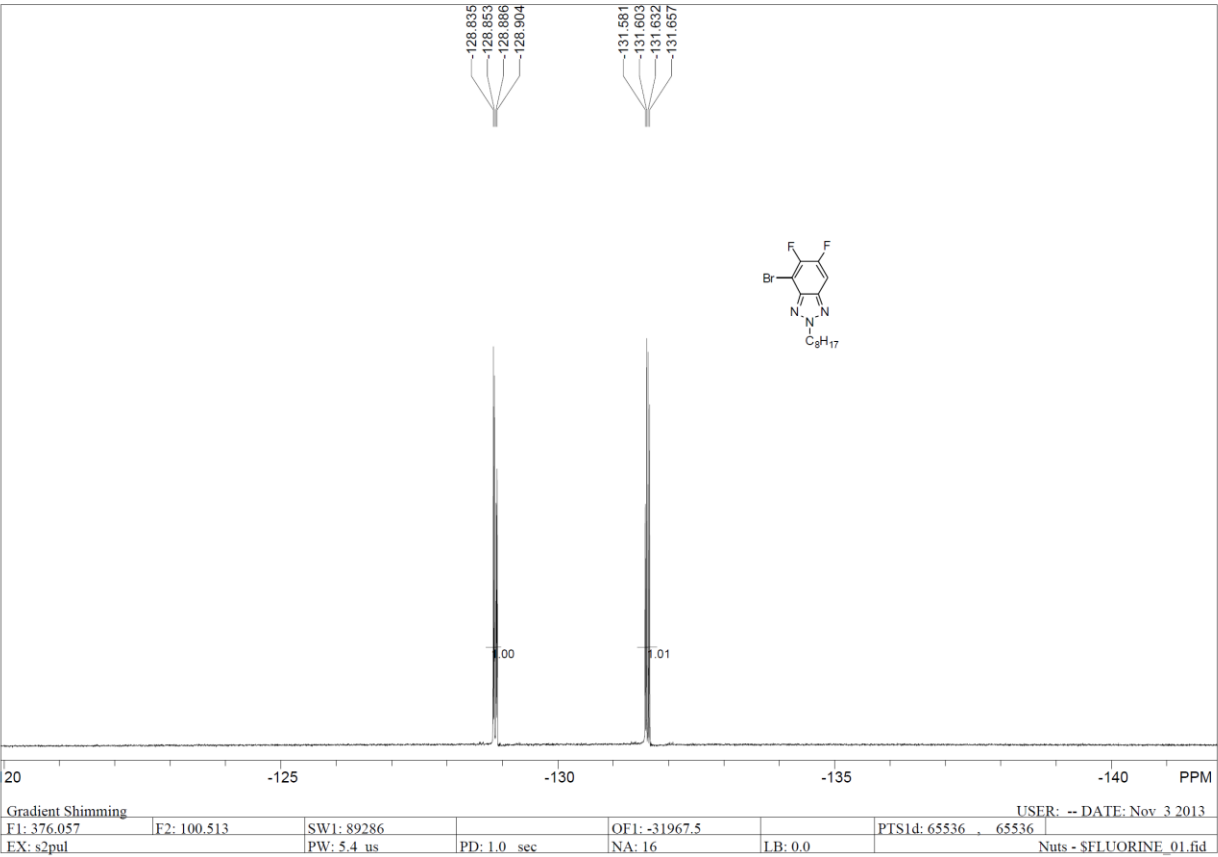

**4-Bromo-7-(5-bromo-4-hexylthiophen-2-yl)-5,6-difluorobenzo[c][1,2,5]thiadiazole (3a).**

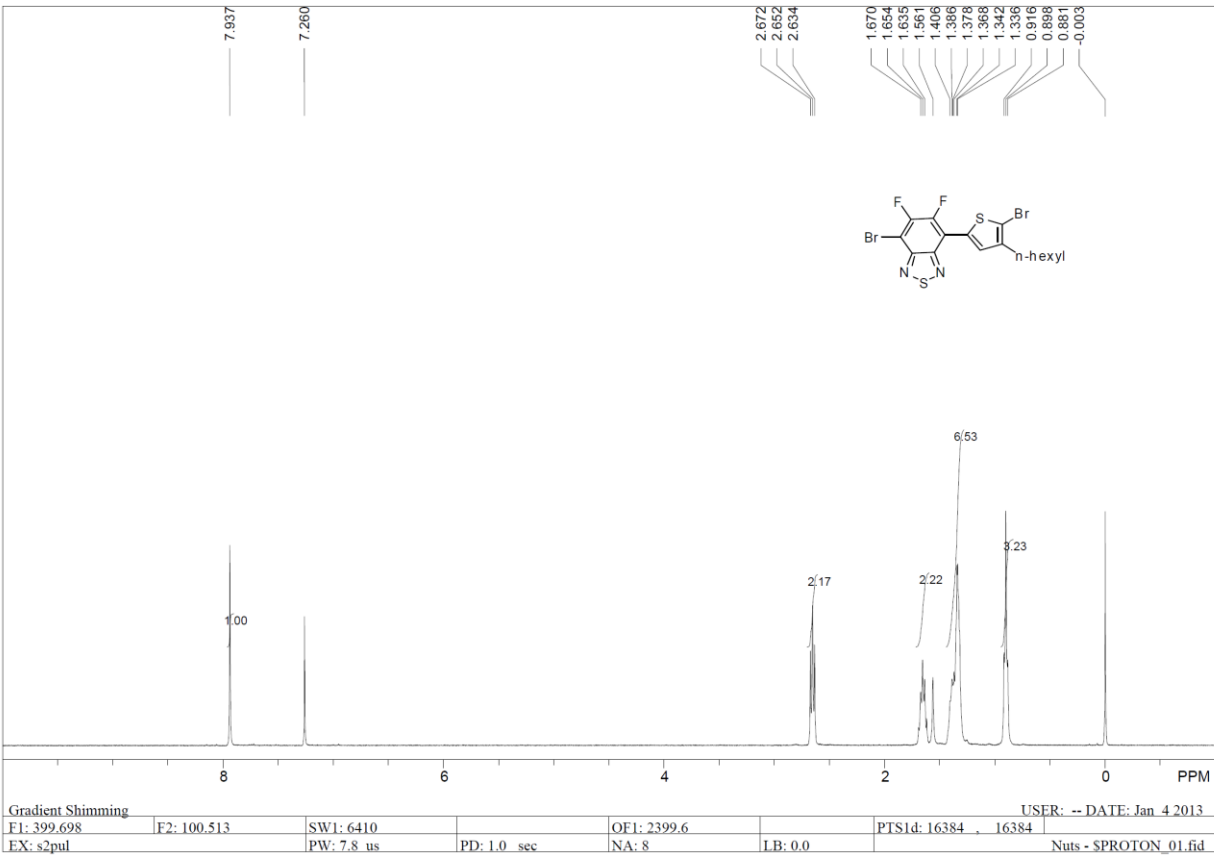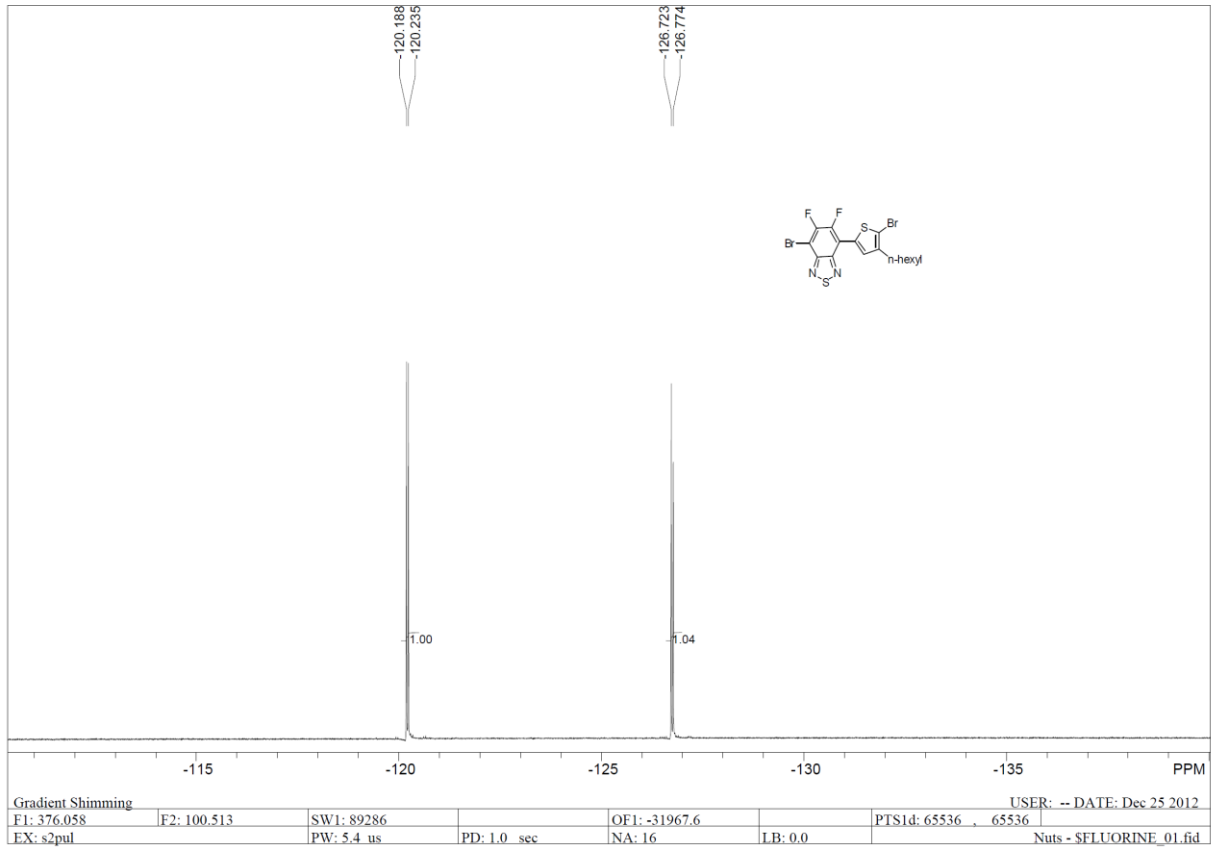



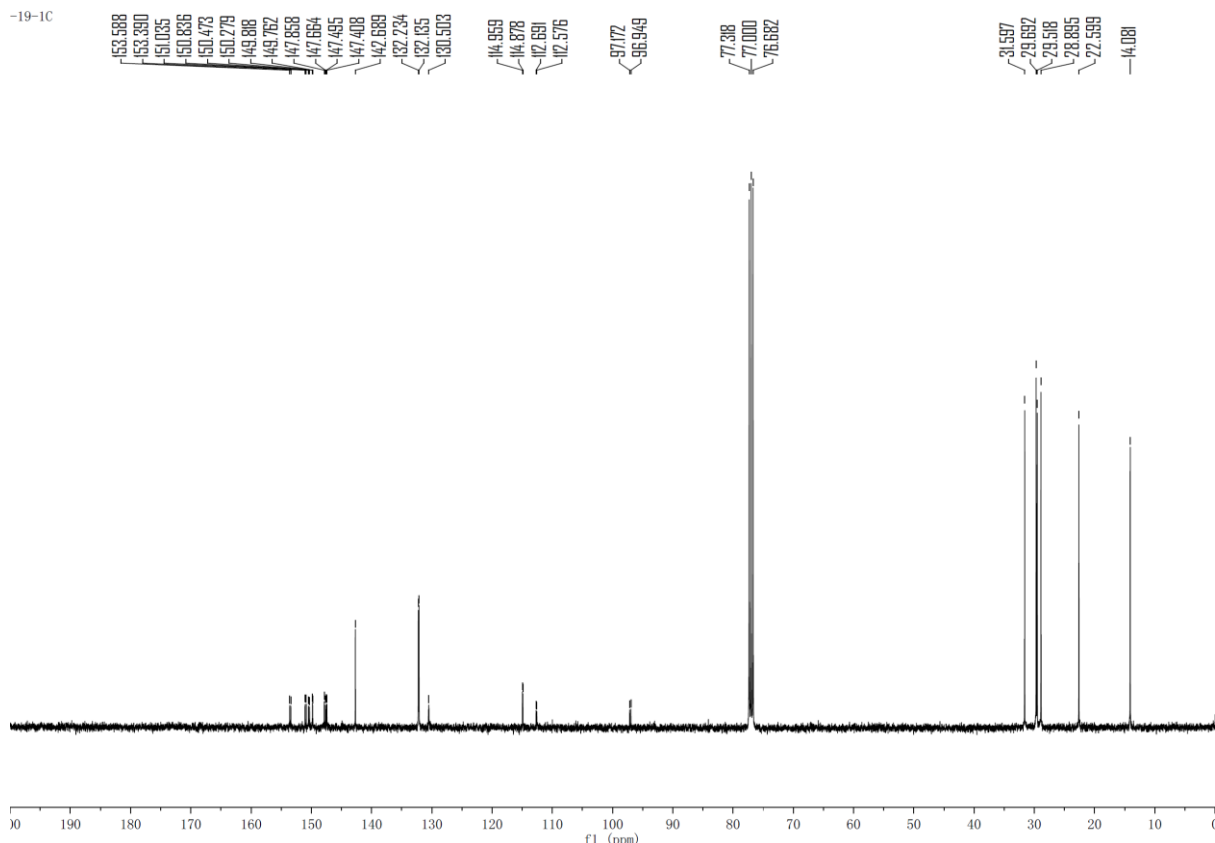

4-Bromo-7-(5-bromothiophen-2-yl)-5,6-difluorobenzo[c][1,2,5]thiadiazole (3b).

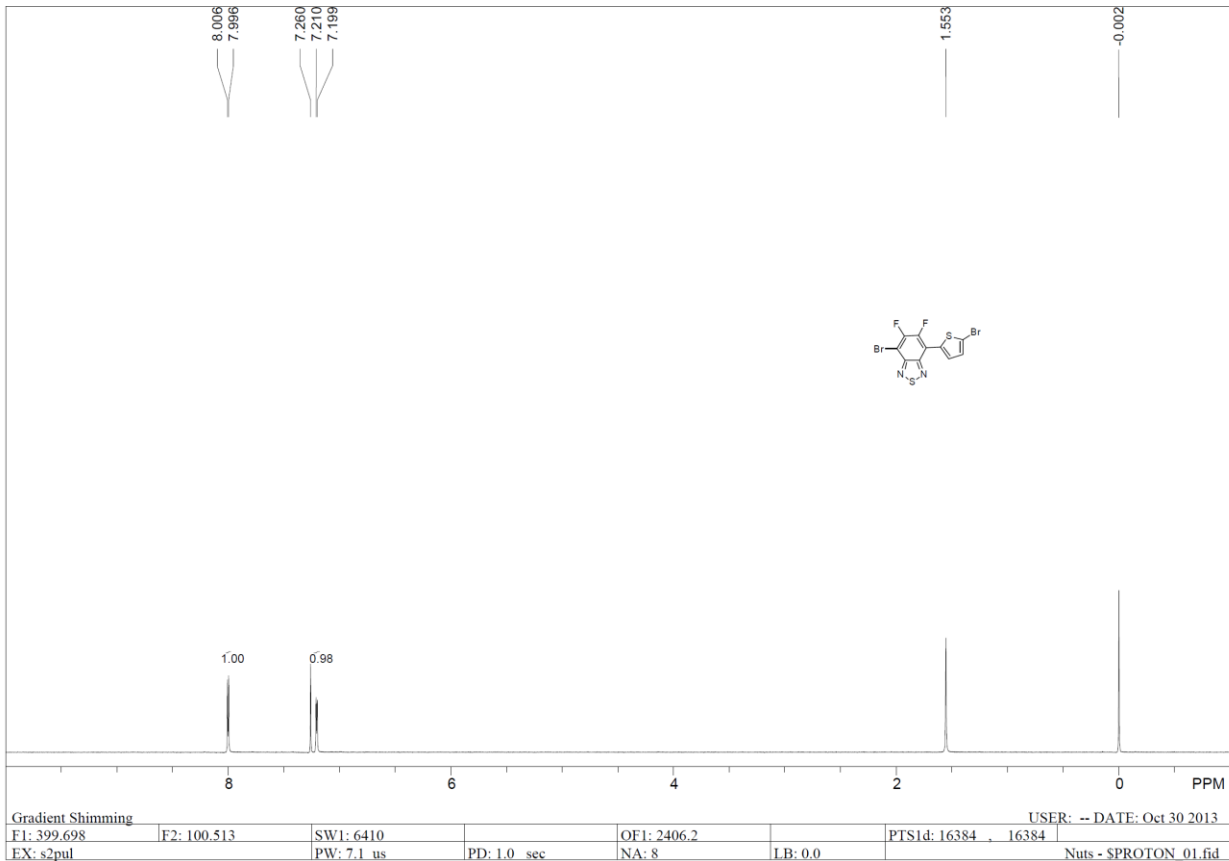

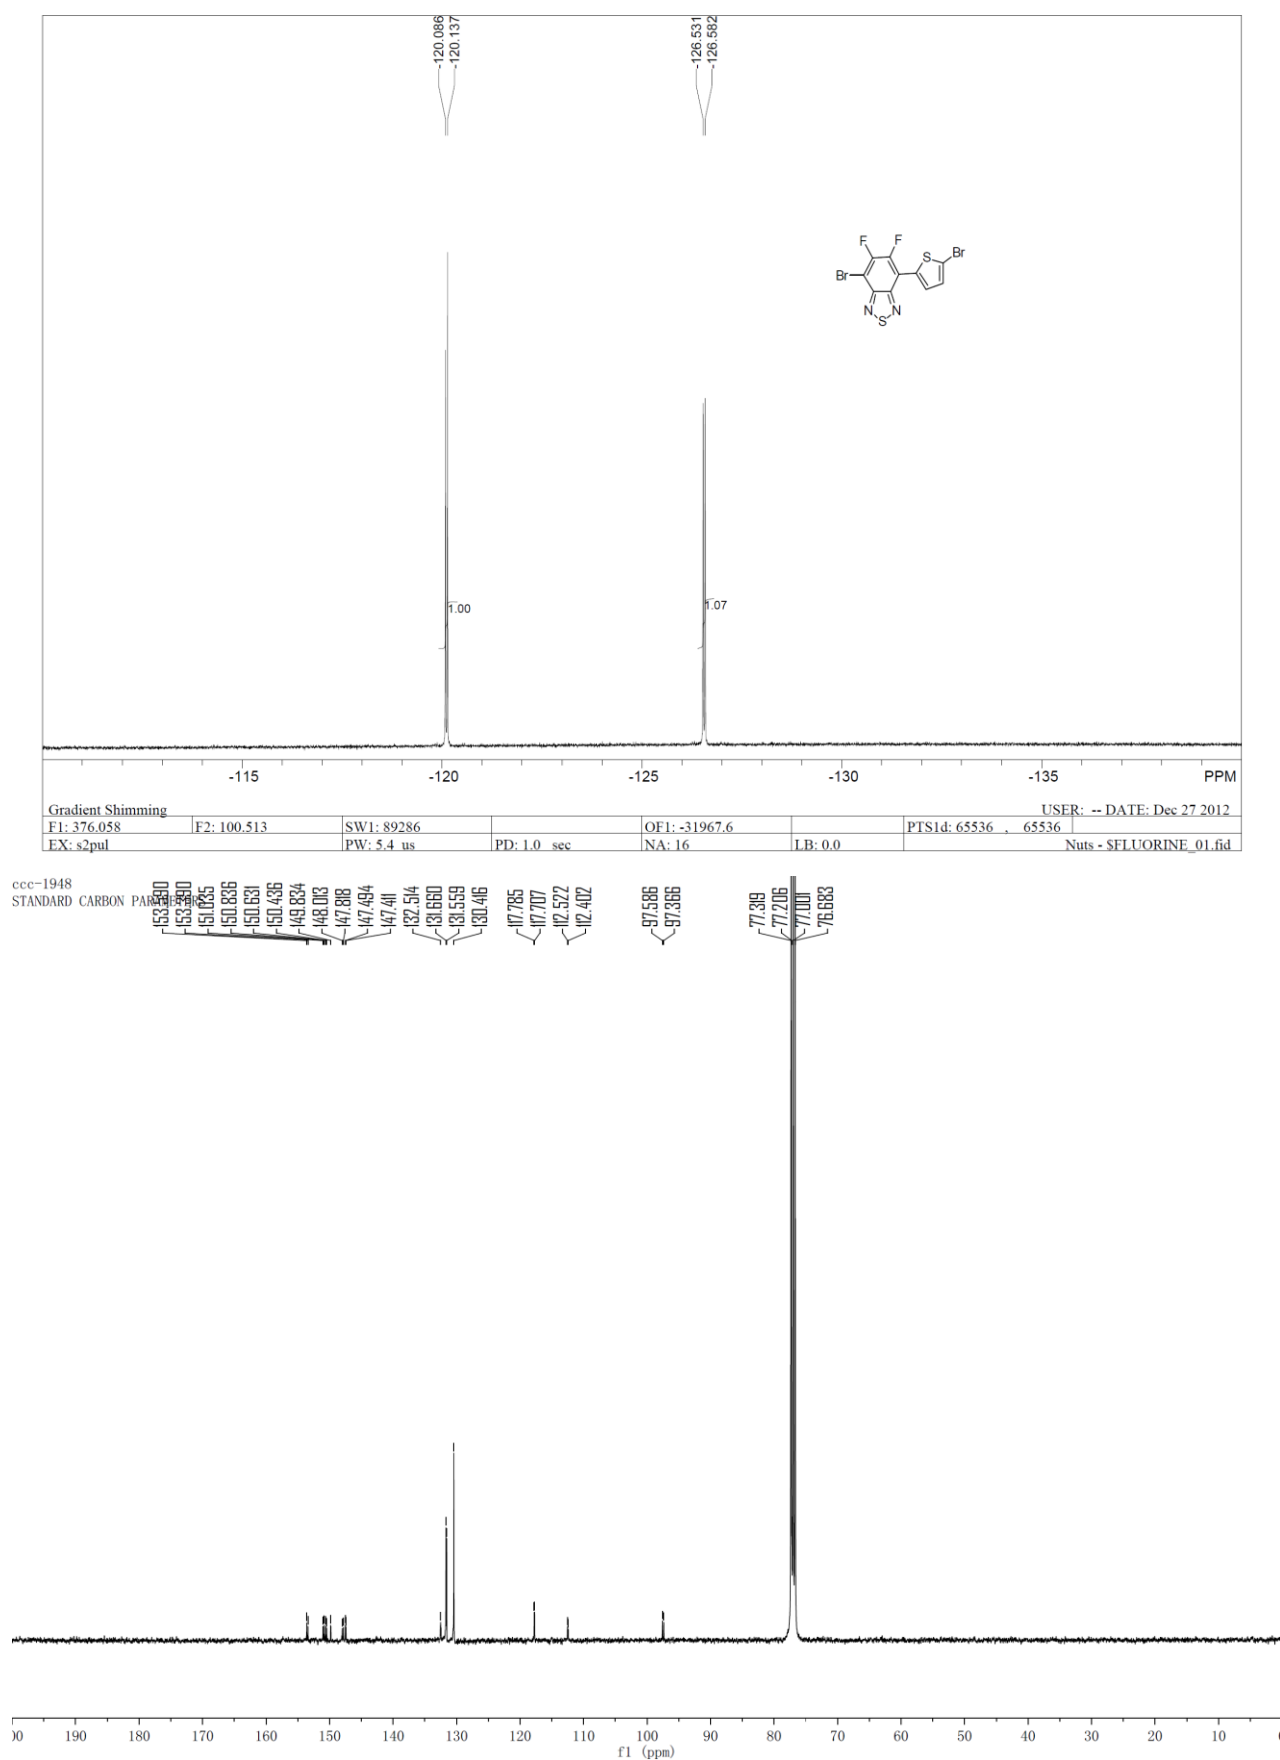

**4-Bromo-7-(5-chlorothiophen-2-yl)-5,6-difluorobenzo[c][1,2,5]thiadiazole (3c).**

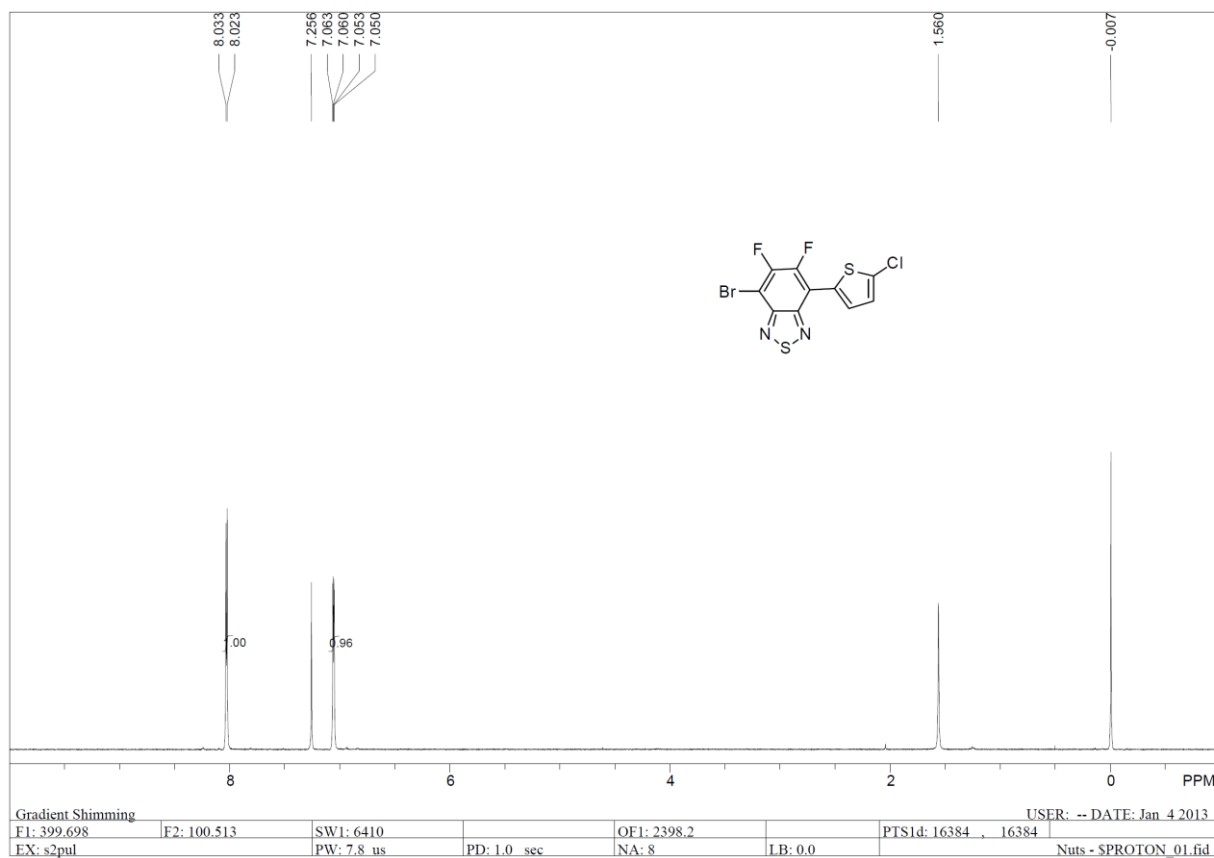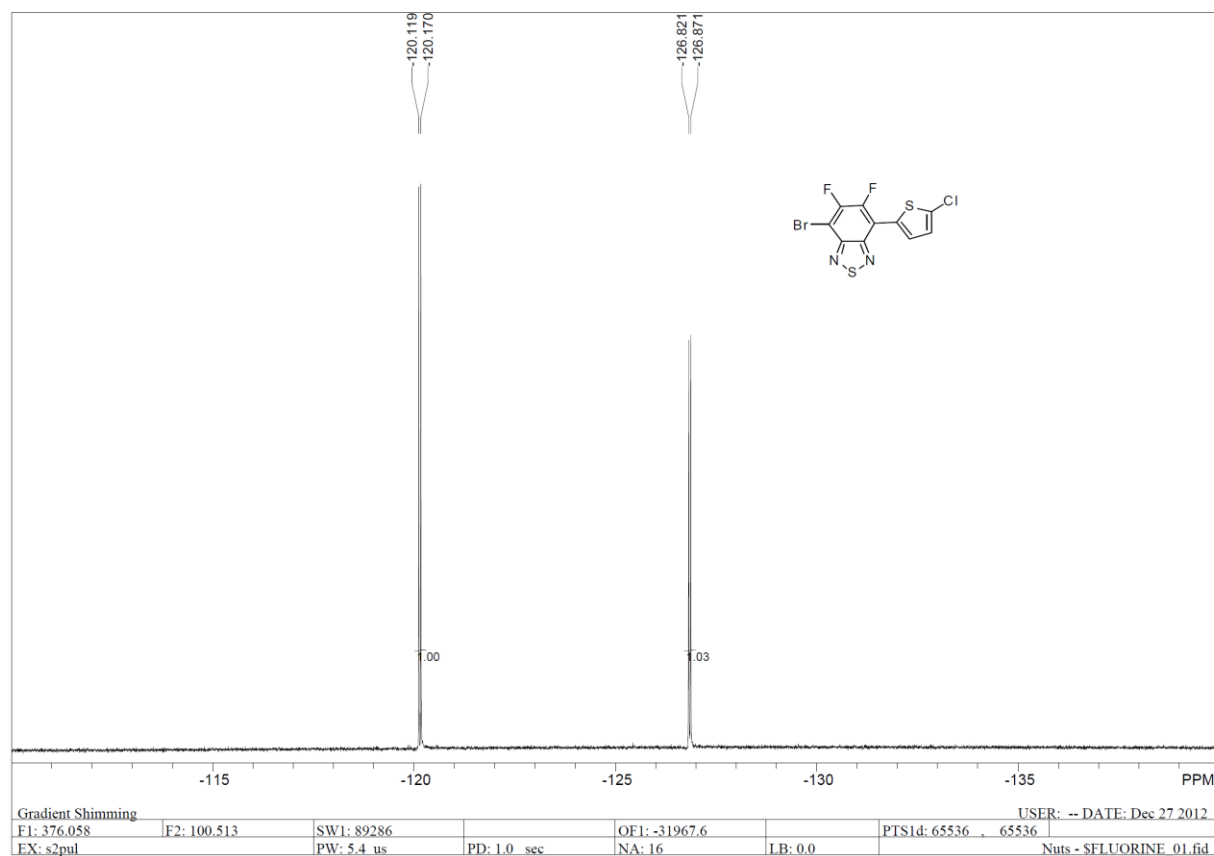

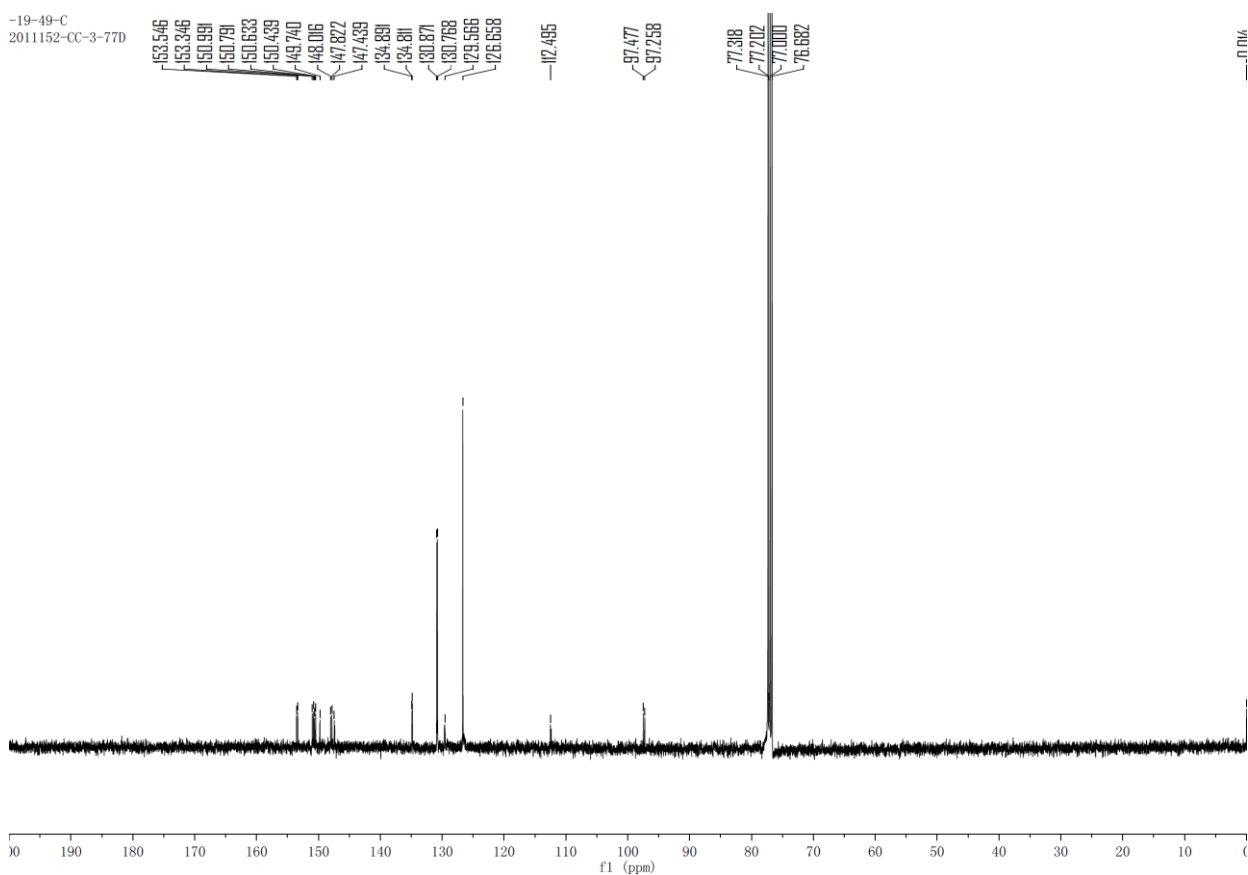

Methyl 5-(7-bromo-5,6-difluorobenzo[c][1,2,5]thiadiazol-4-yl)thiophene-2-carboxylate (3d).

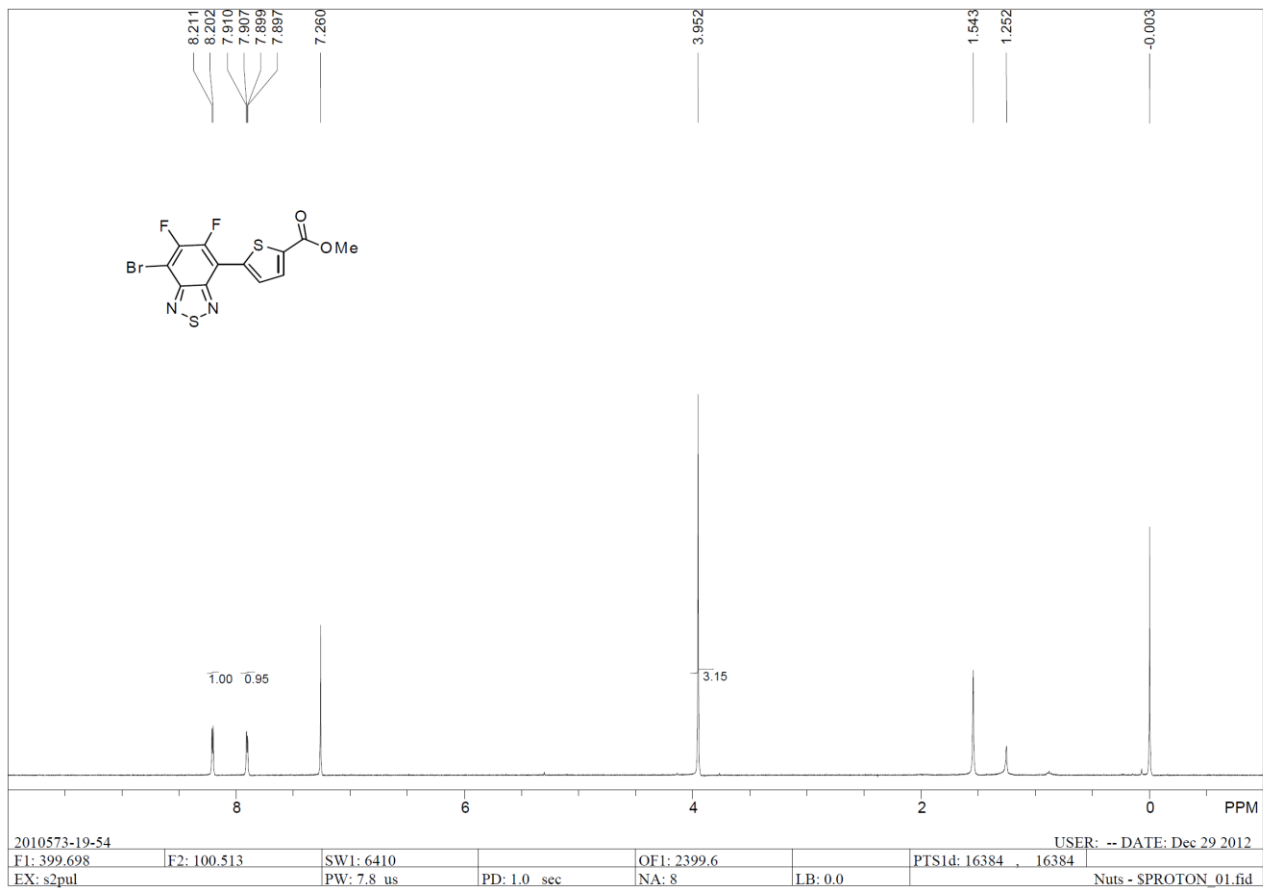

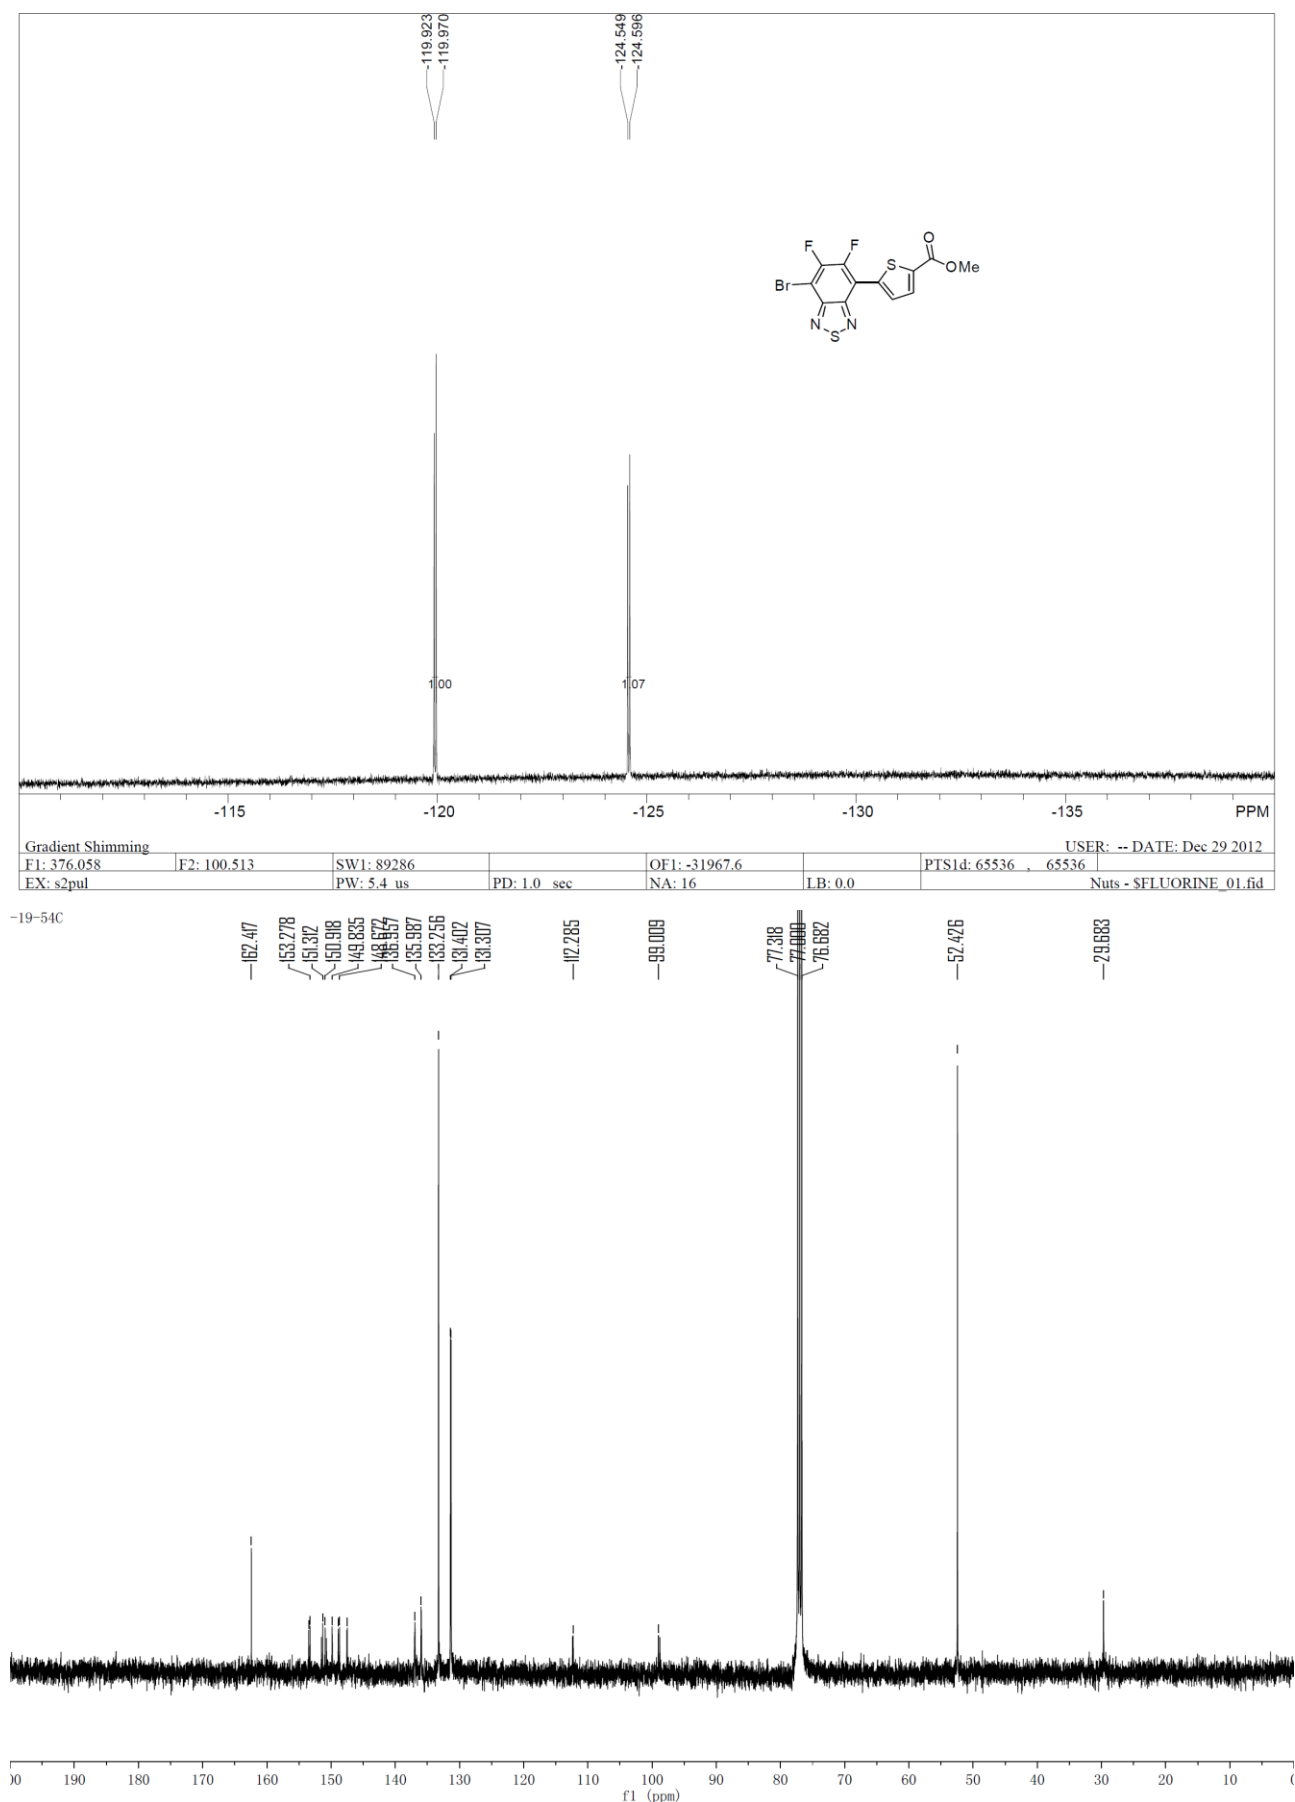

Methyl 5-(7-bromo-5,6-difluorobenzo[c][1,2,5]thiadiazol-4-yl)-3-methylthiophene-2-carboxylate (3e).

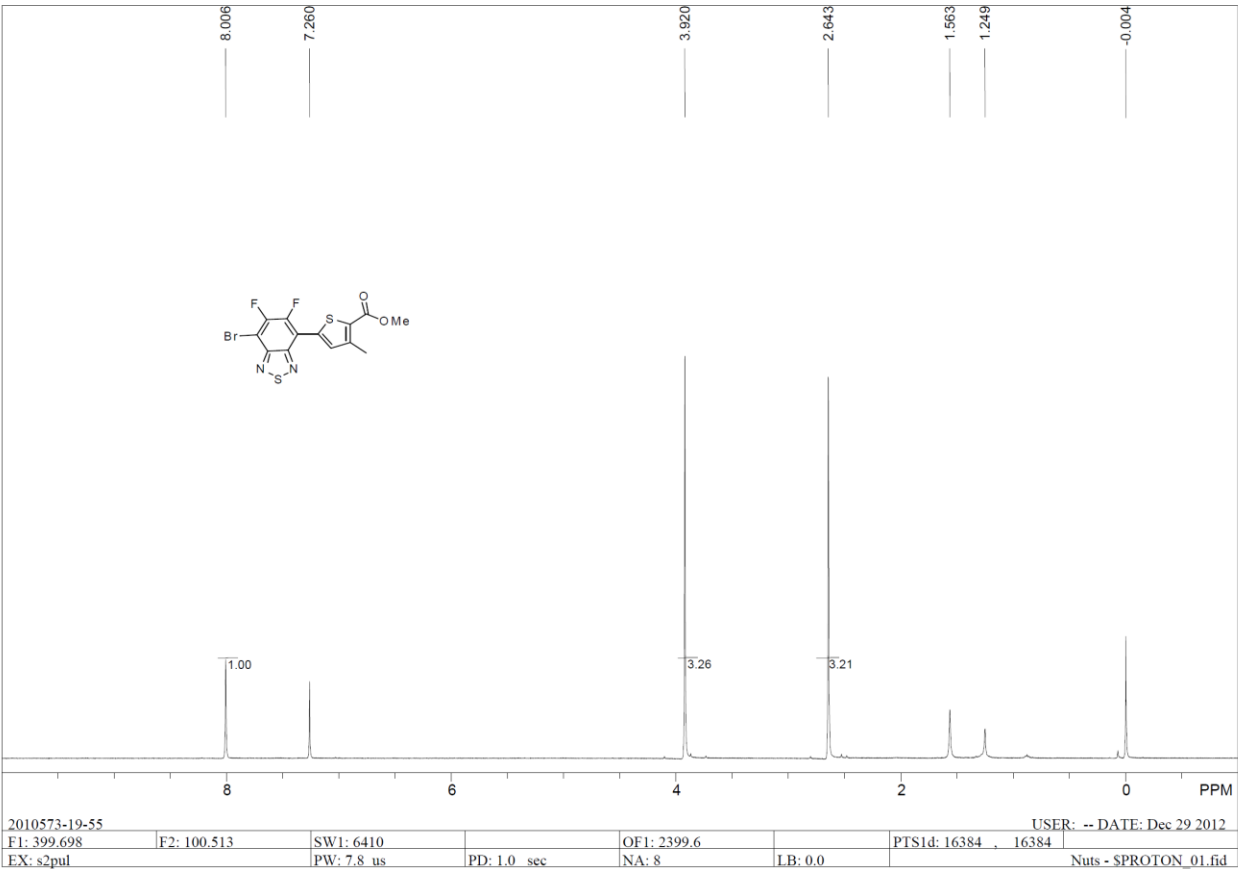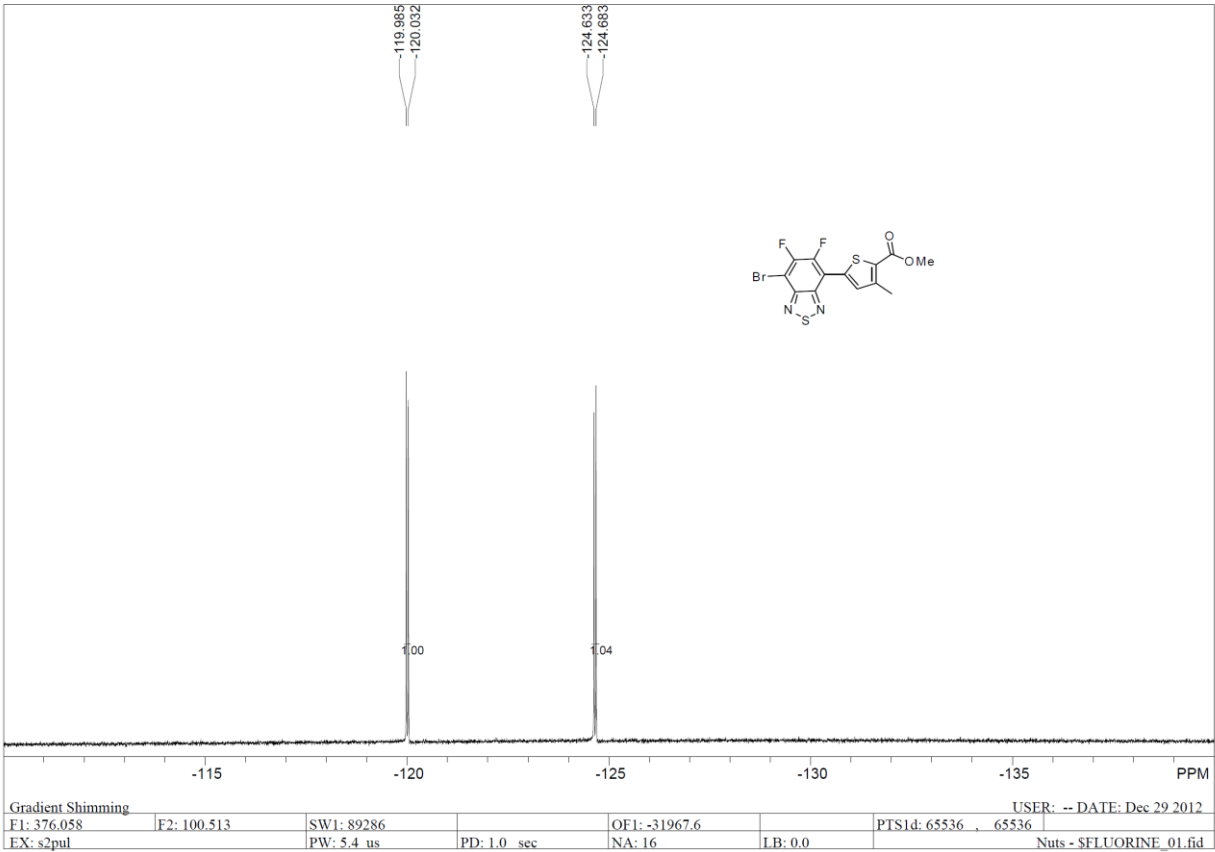

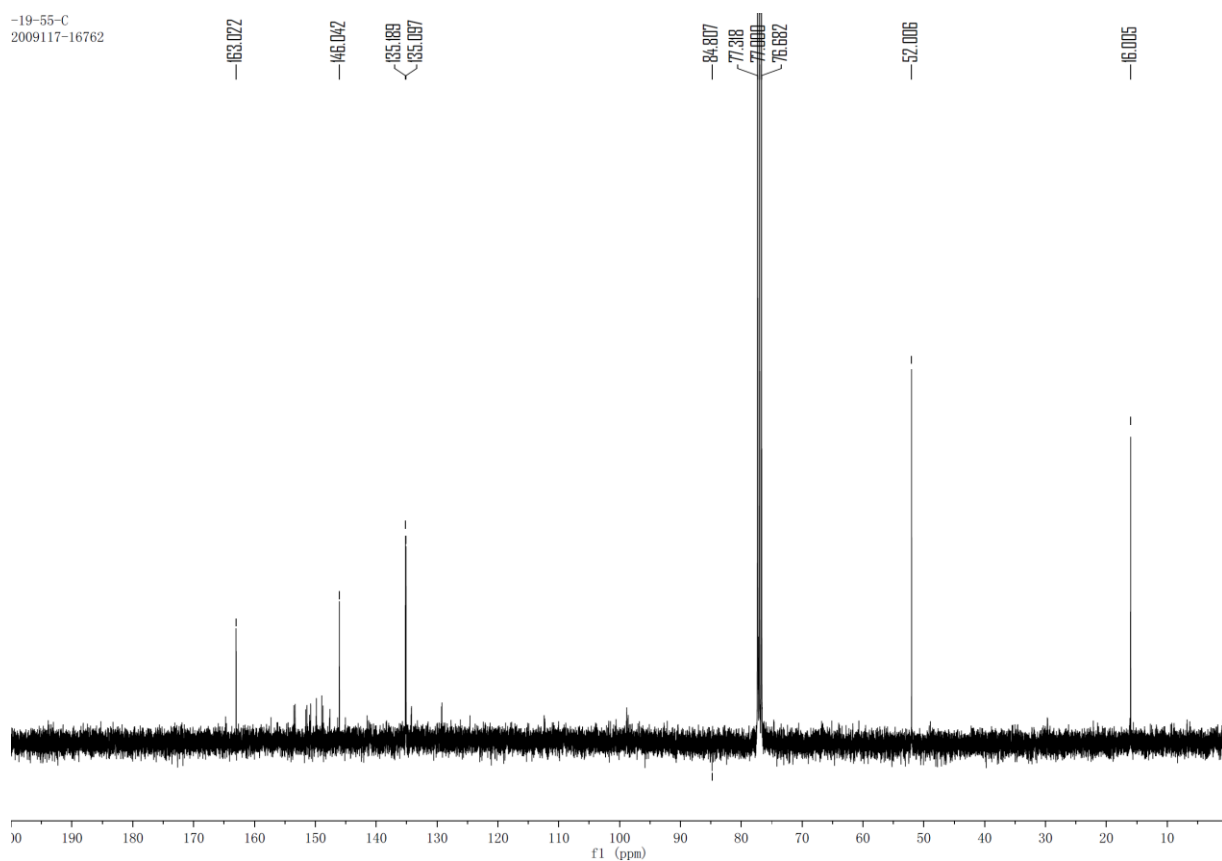

**5-(7-Bromo-5,6-difluorobenzo[c][1,2,5]thiadiazol-4-yl)thiophene-2-carbaldehyde (3f).**

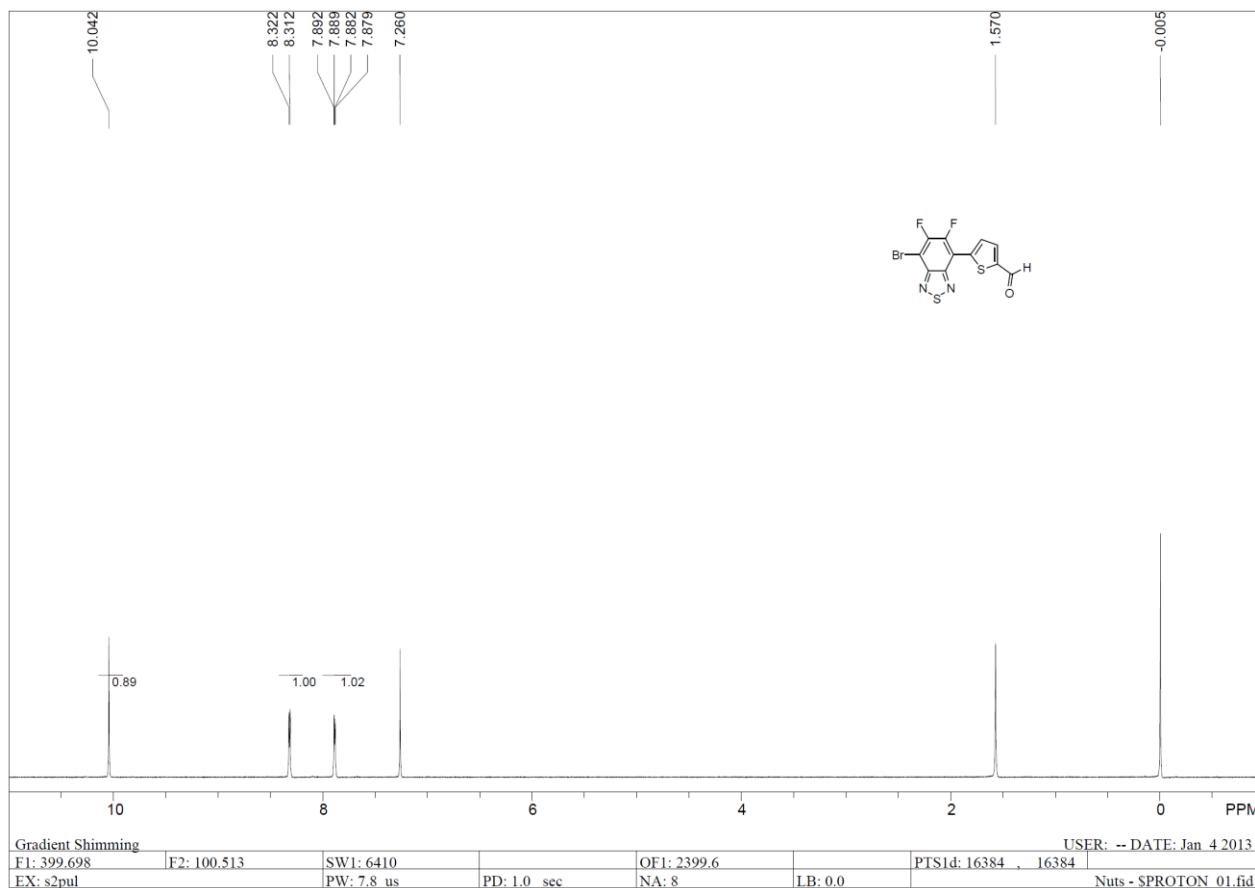

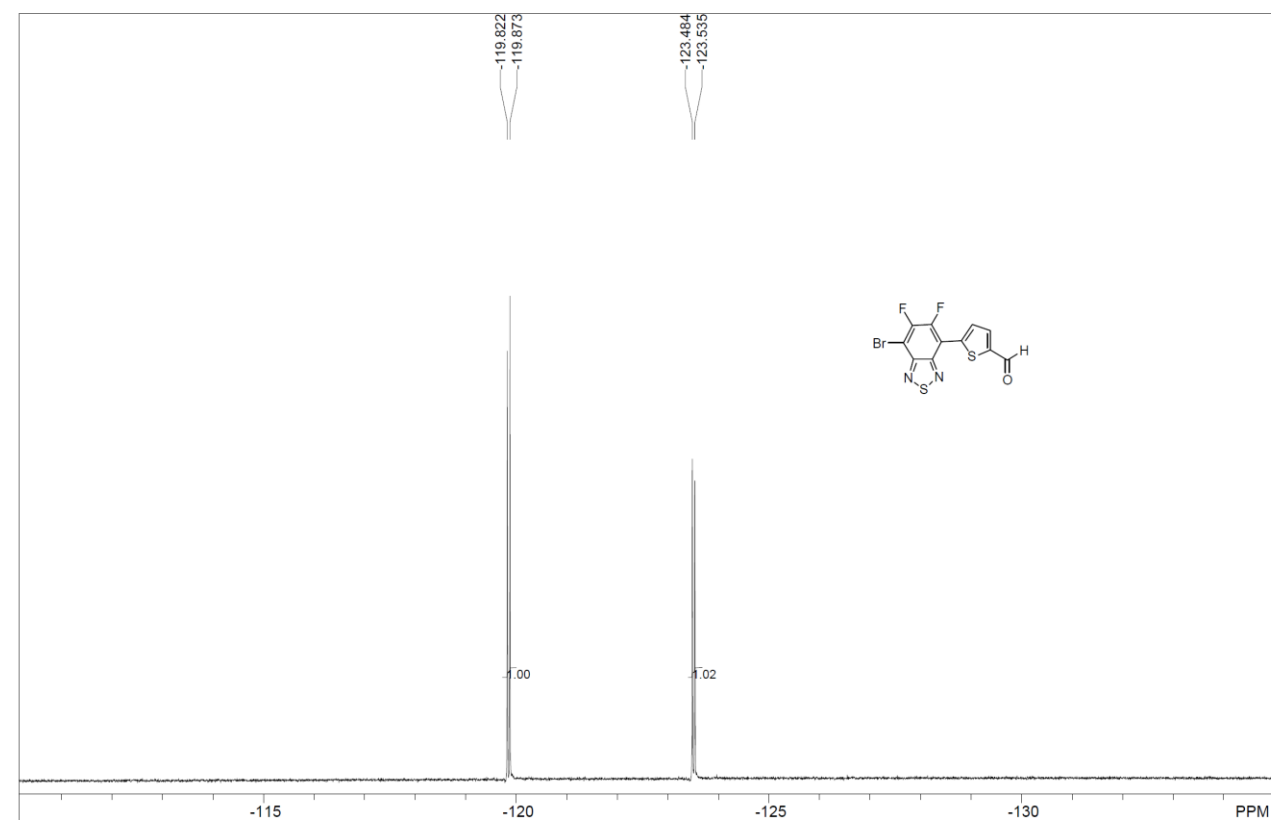

|                   |             |            |             |               |         |                           |       |
|-------------------|-------------|------------|-------------|---------------|---------|---------------------------|-------|
| Gradient Shimming |             |            |             |               |         | USER: -- DATE: Jan 9 2013 |       |
| F1: 376.058       | F2: 100.513 | SW1: 89286 |             | OF1: -31967.6 |         | PTS1d: 65536              | 65536 |
| EX: s2pul         |             | PW: 5.4 us | PD: 1.0 sec | NA: 16        | LB: 0.0 | Nuts - SFLUORINE_01.fid   |       |

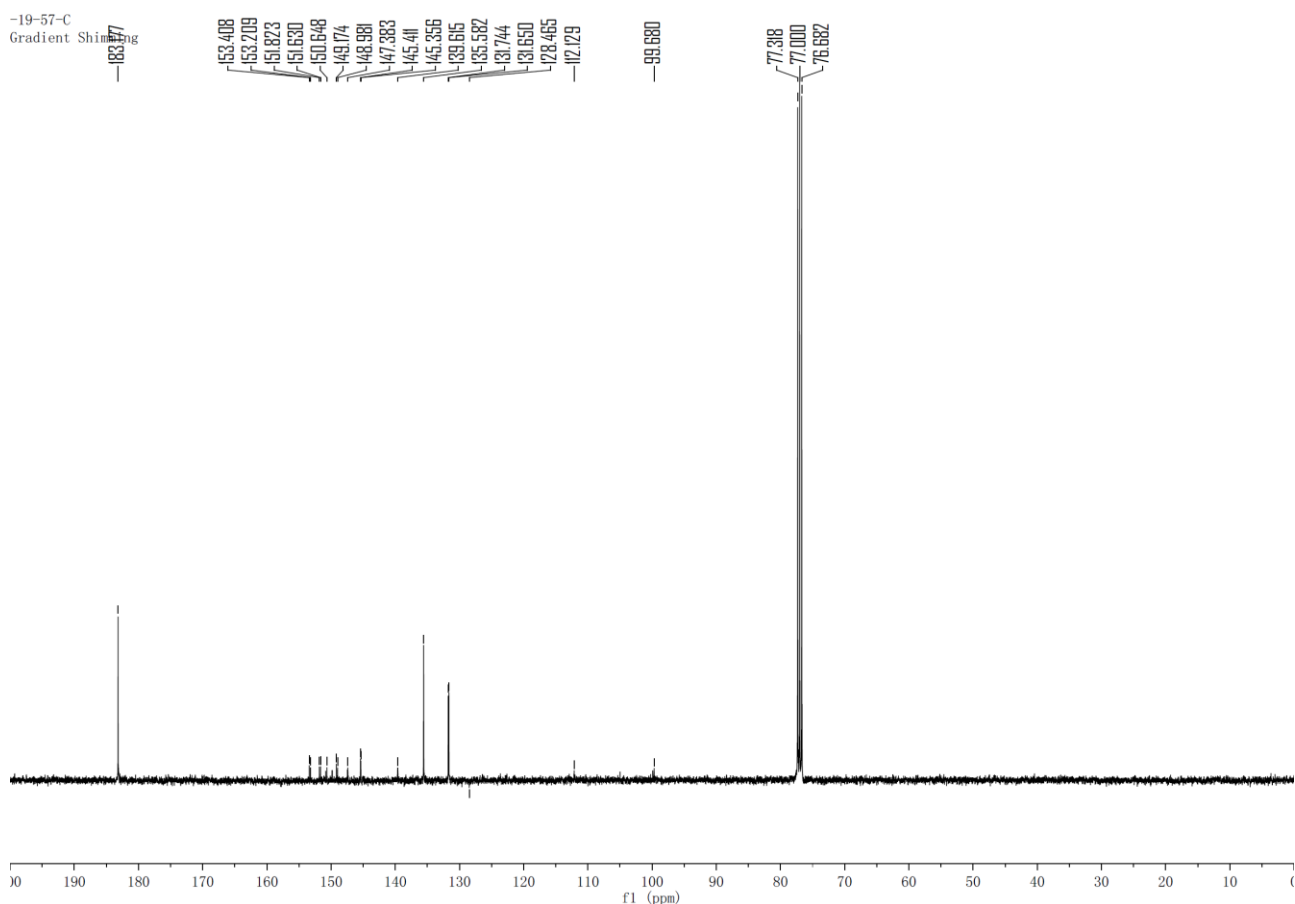



5'-(7-Bromo-5,6-difluorobenzo[c][1,2,5]thiadiazol-4-yl)-[2,2'-bithiophene]-5-carbaldehyde (3g).

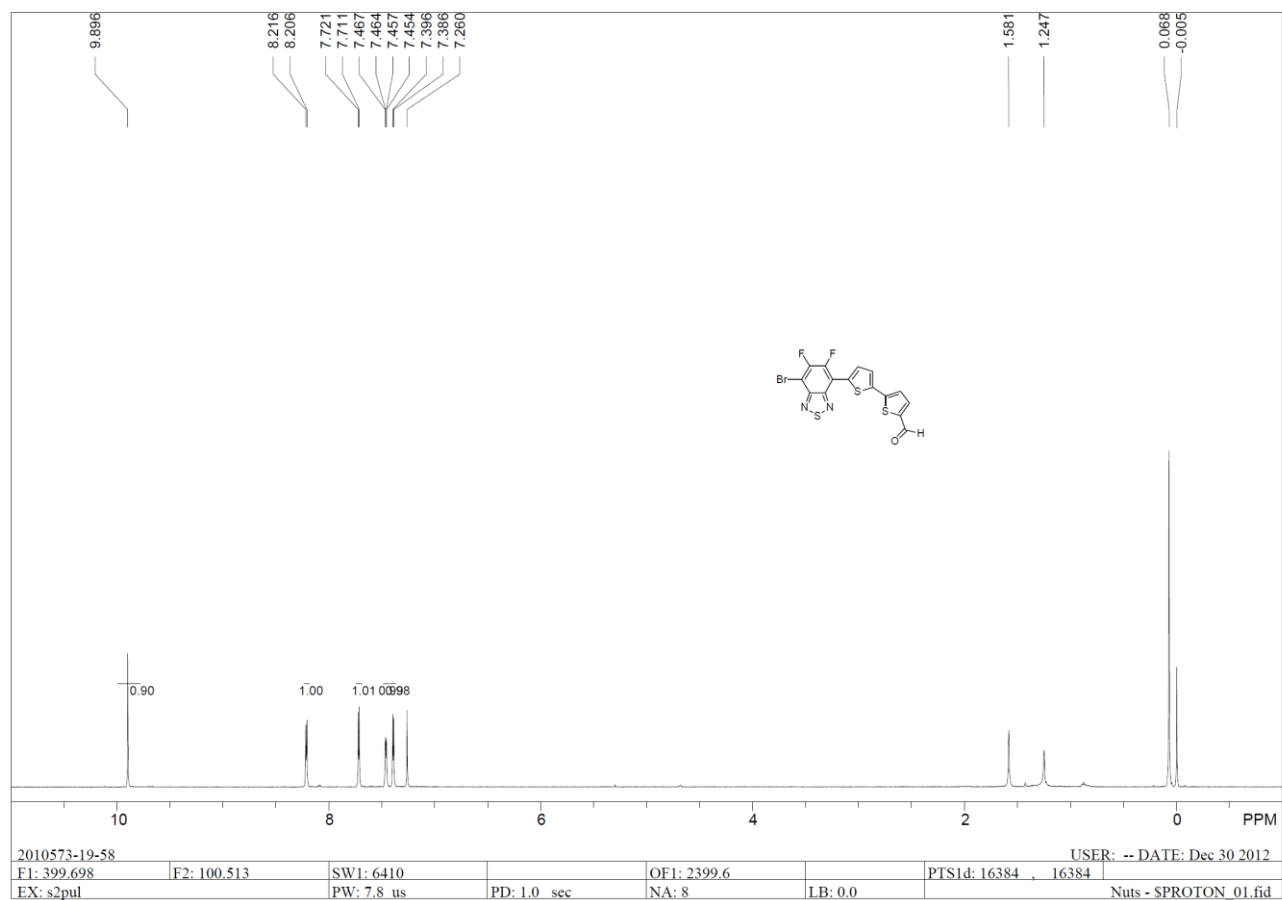

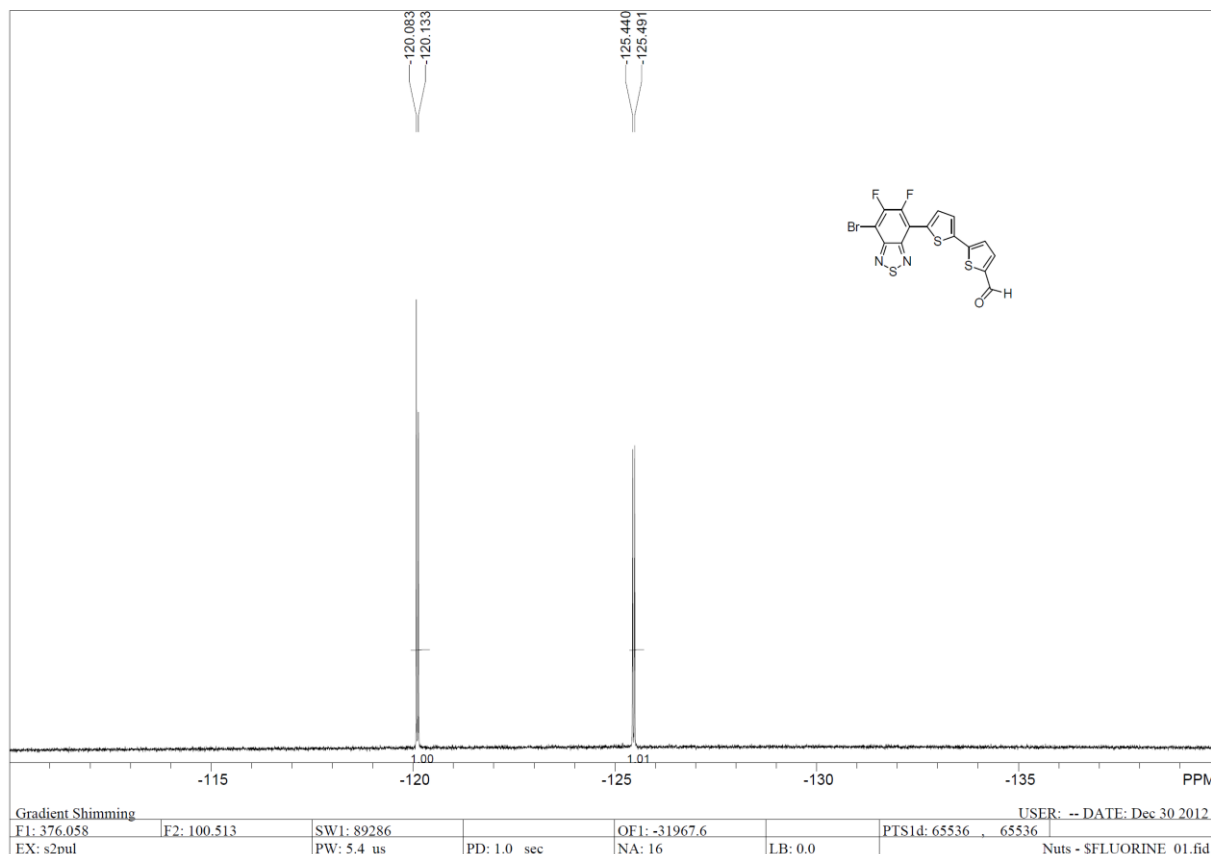

**4-Bromo-5,6-difluoro-7-(5-(phenylethynyl)thiophen-2-yl)benzo[c][1,2,5]thiadiazole (3h).**

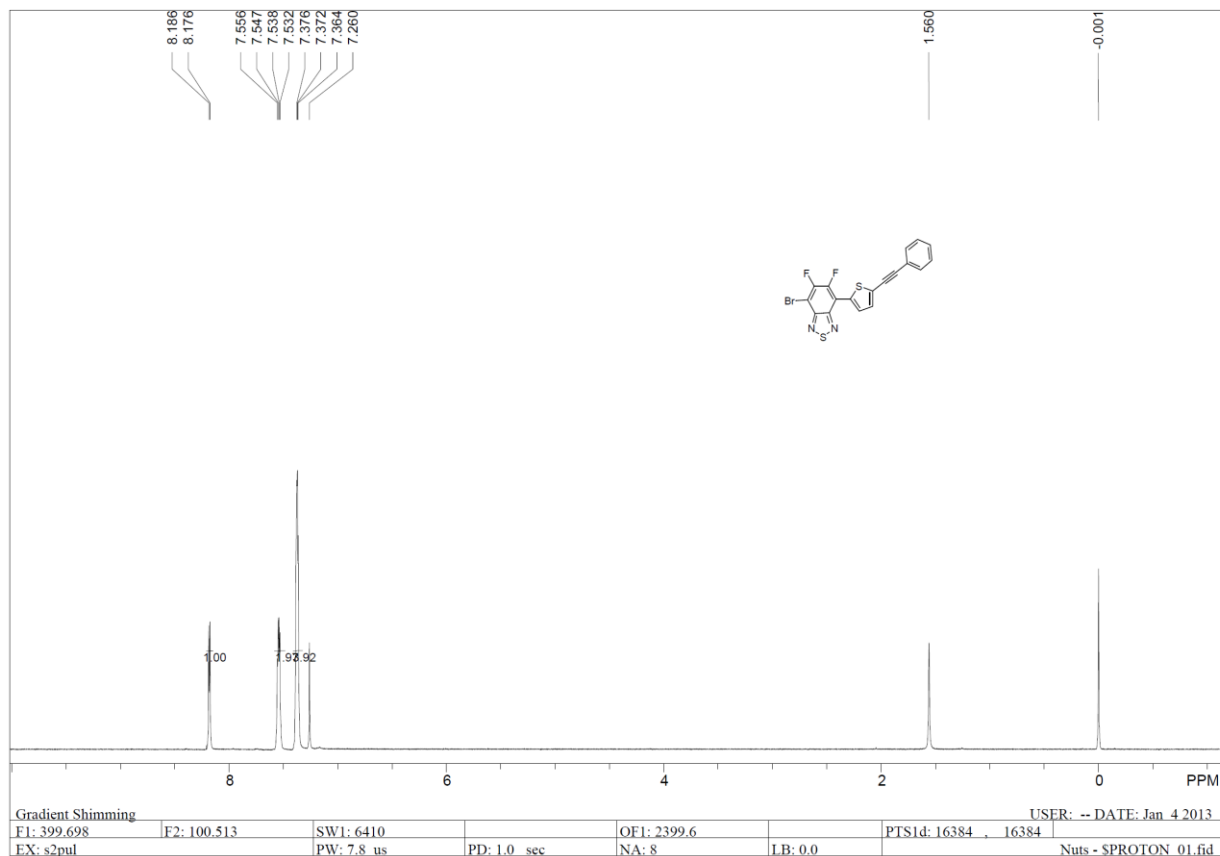

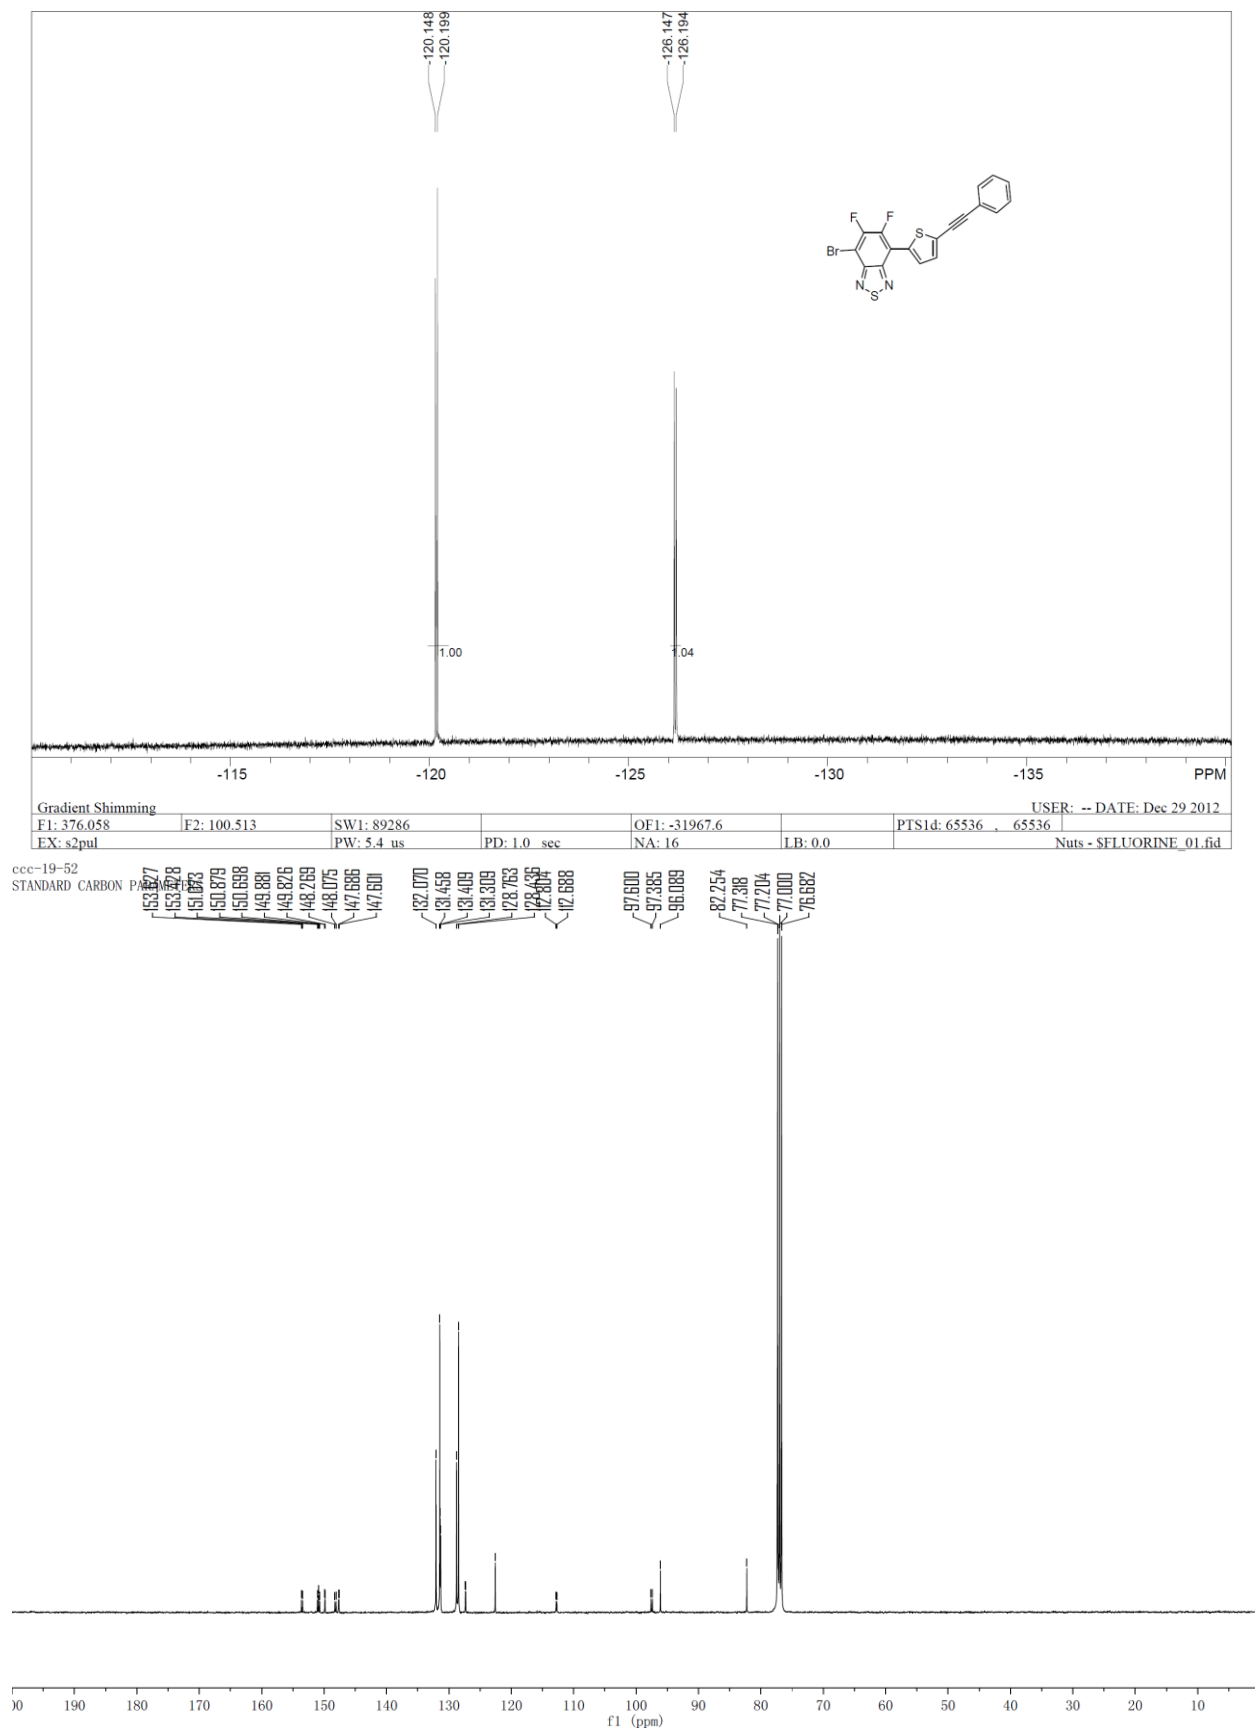

**4-Bromo-5,6-difluoro-7-(5-methylthiophen-2-yl)benzo[c][1,2,5]thiadiazole (3i).**

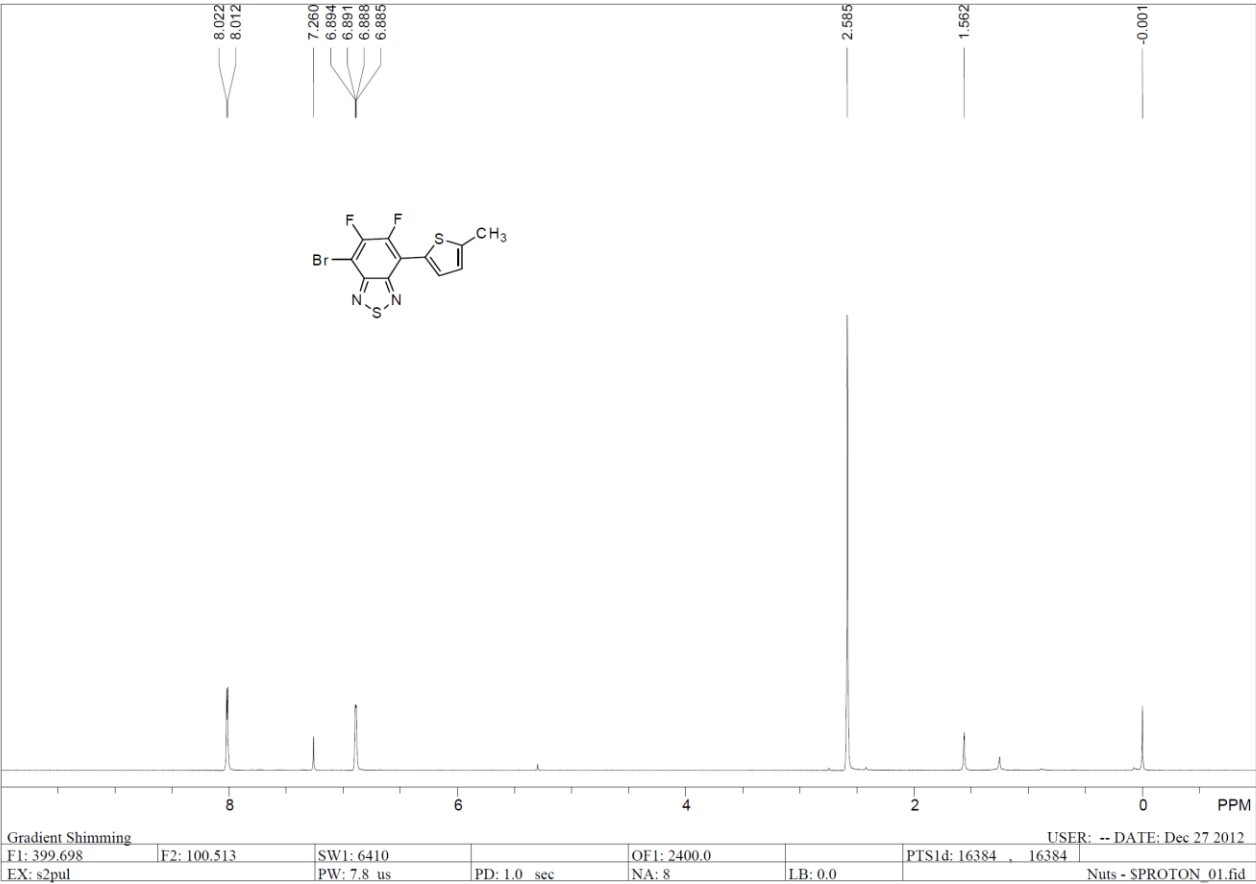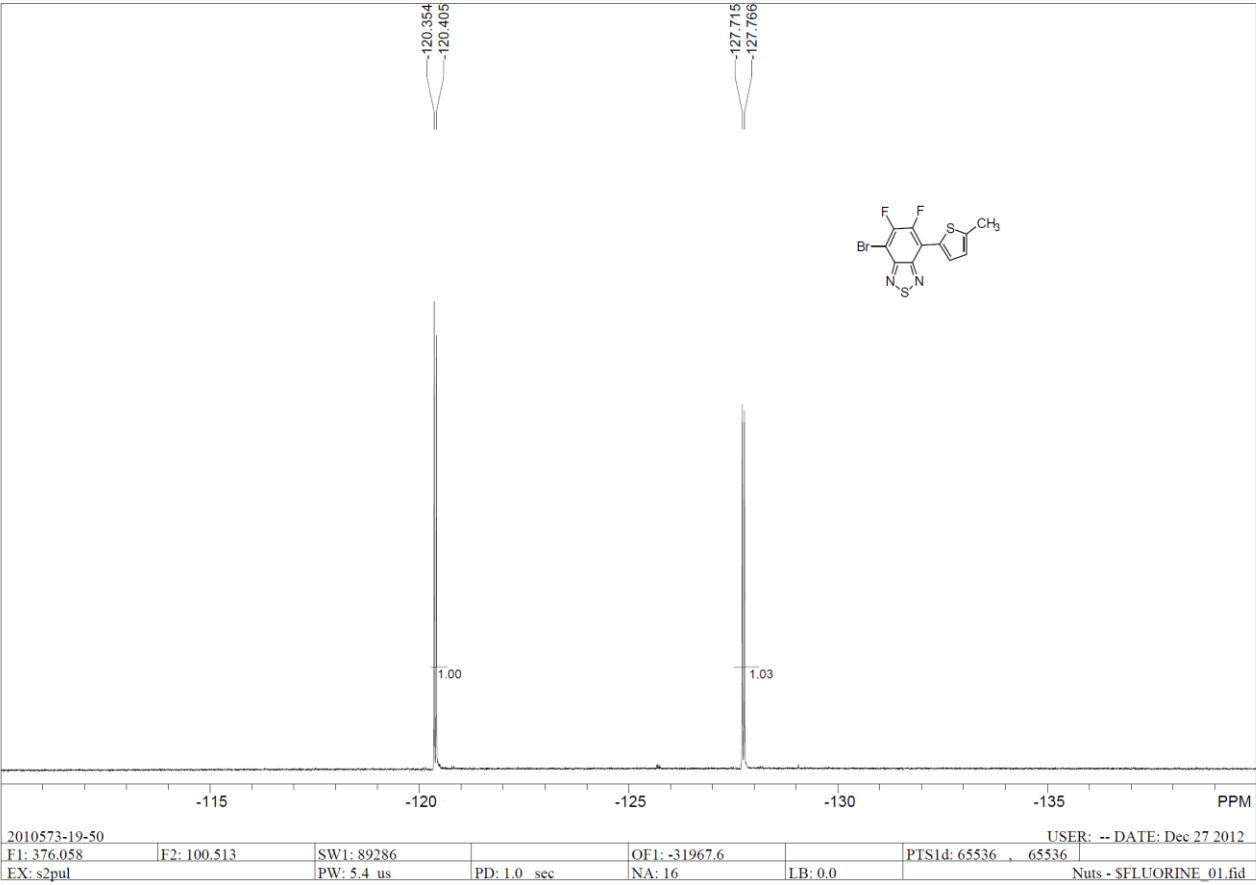

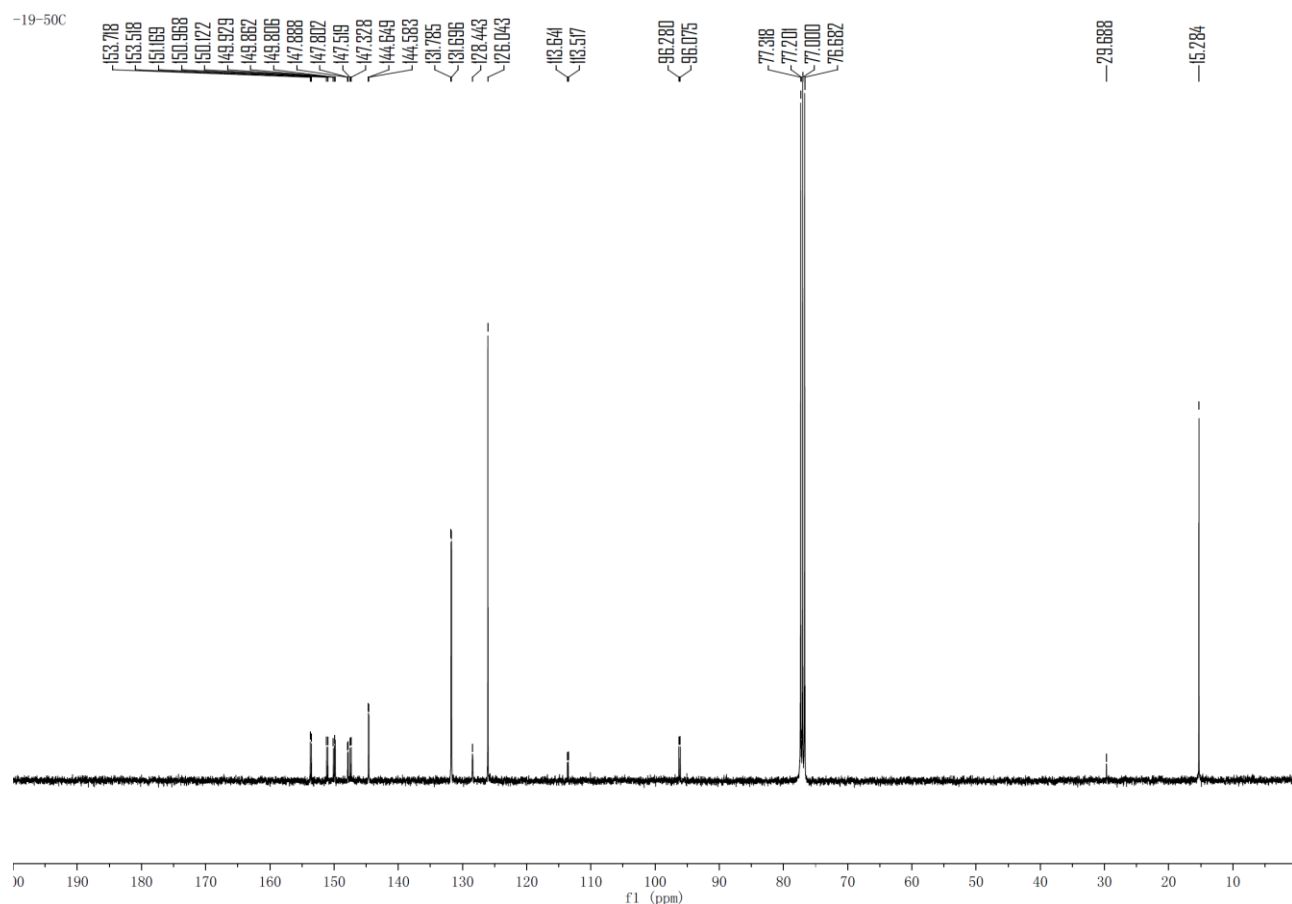

**4-Bromo-5,6-difluoro-7-(5-phenylthiophen-2-yl)benzo[c][1,2,5]thiadiazole (3j).**

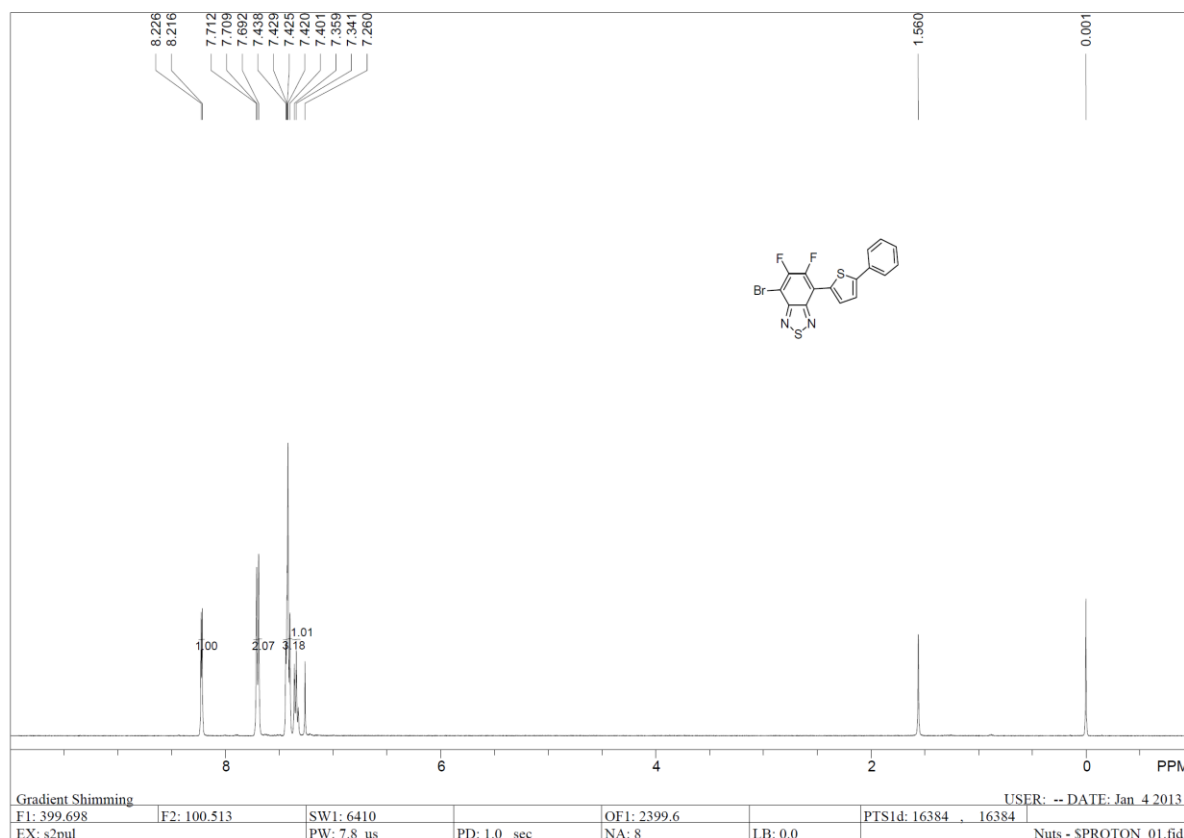

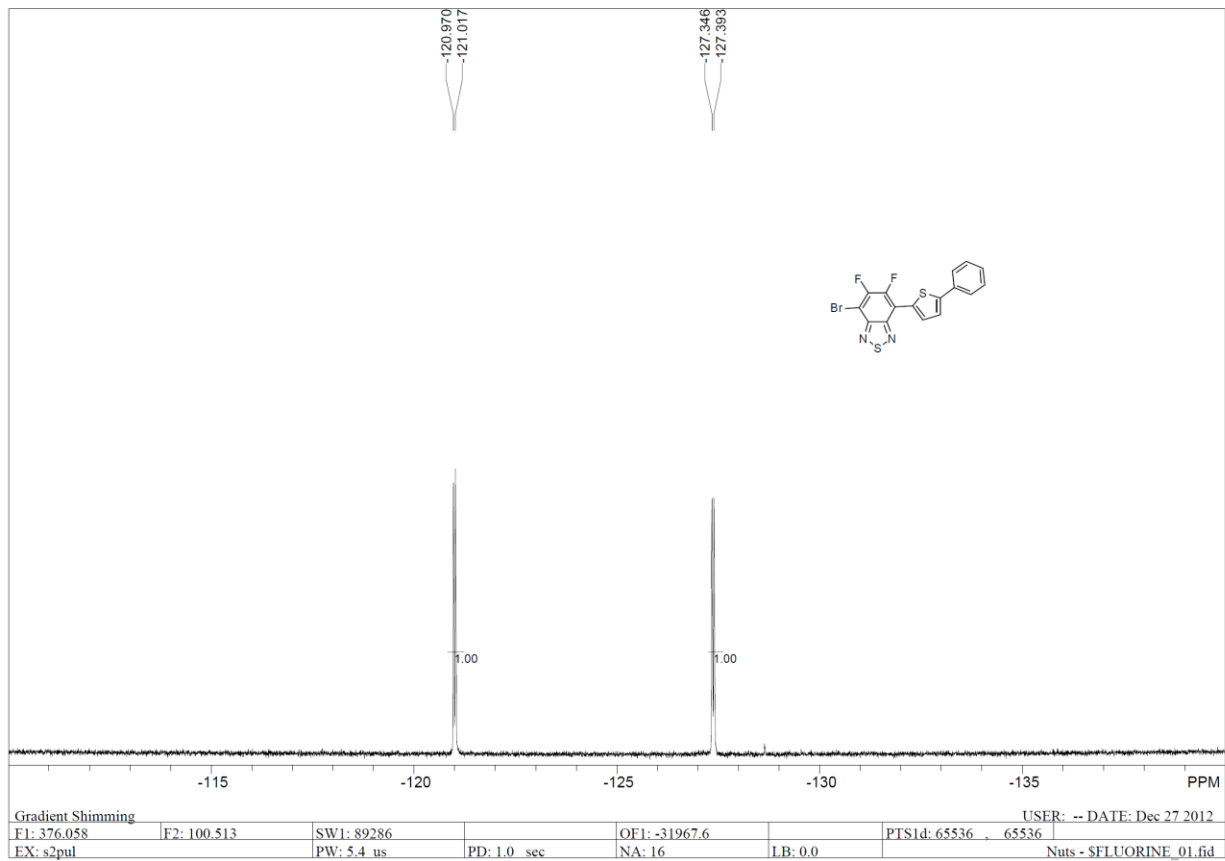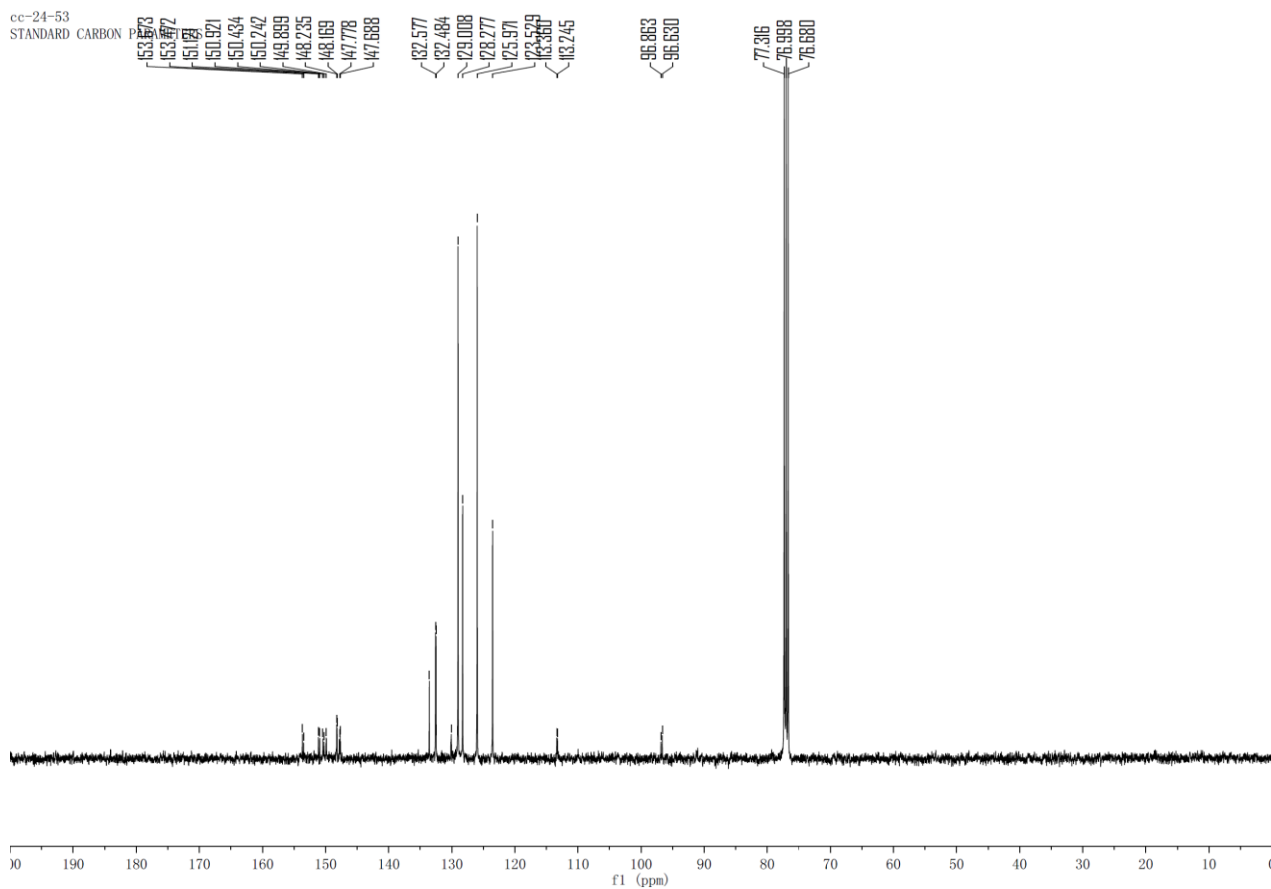

**4-(Benzo[b]thiophen-2-yl)-7-bromo-5,6-difluorobenzo[c][1,2,5]thiadiazole (3k).**

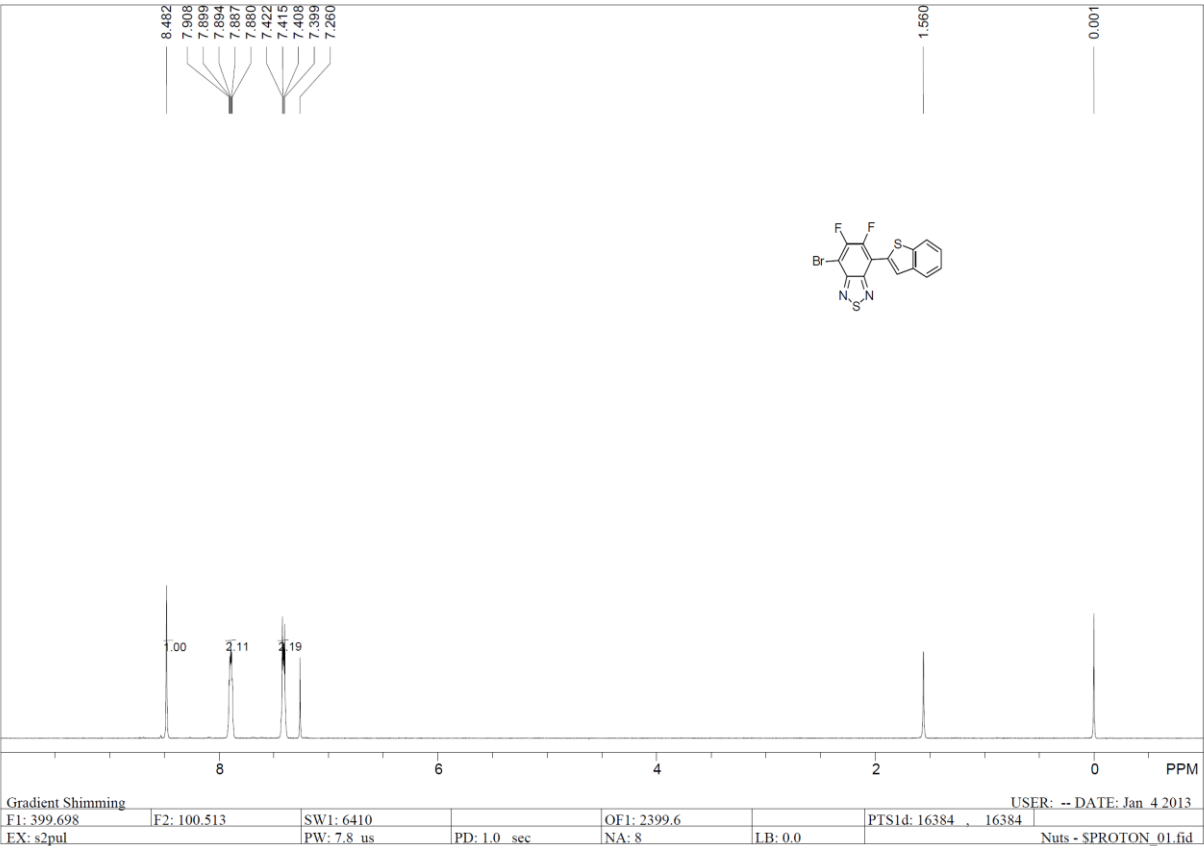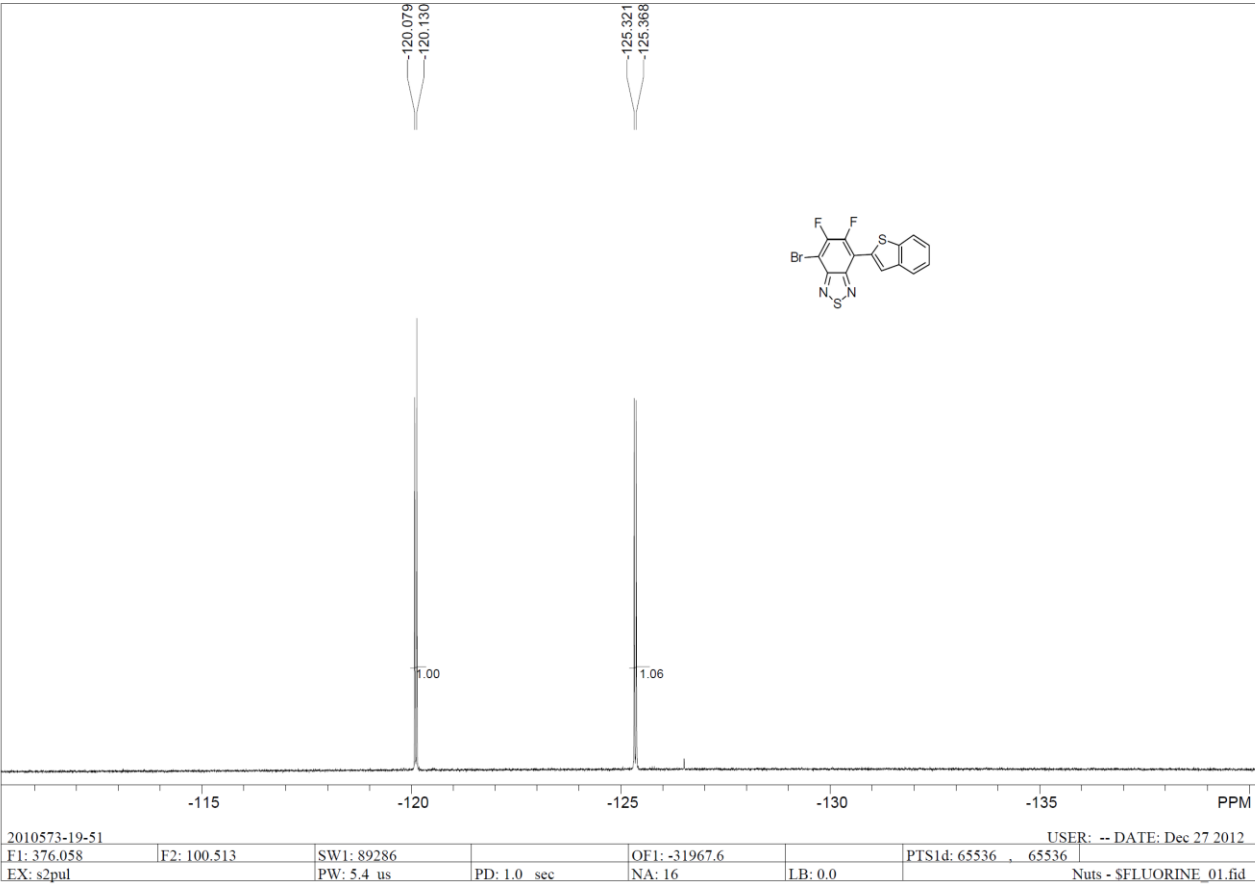

-19-51-C  
2011152-CC-3-77D

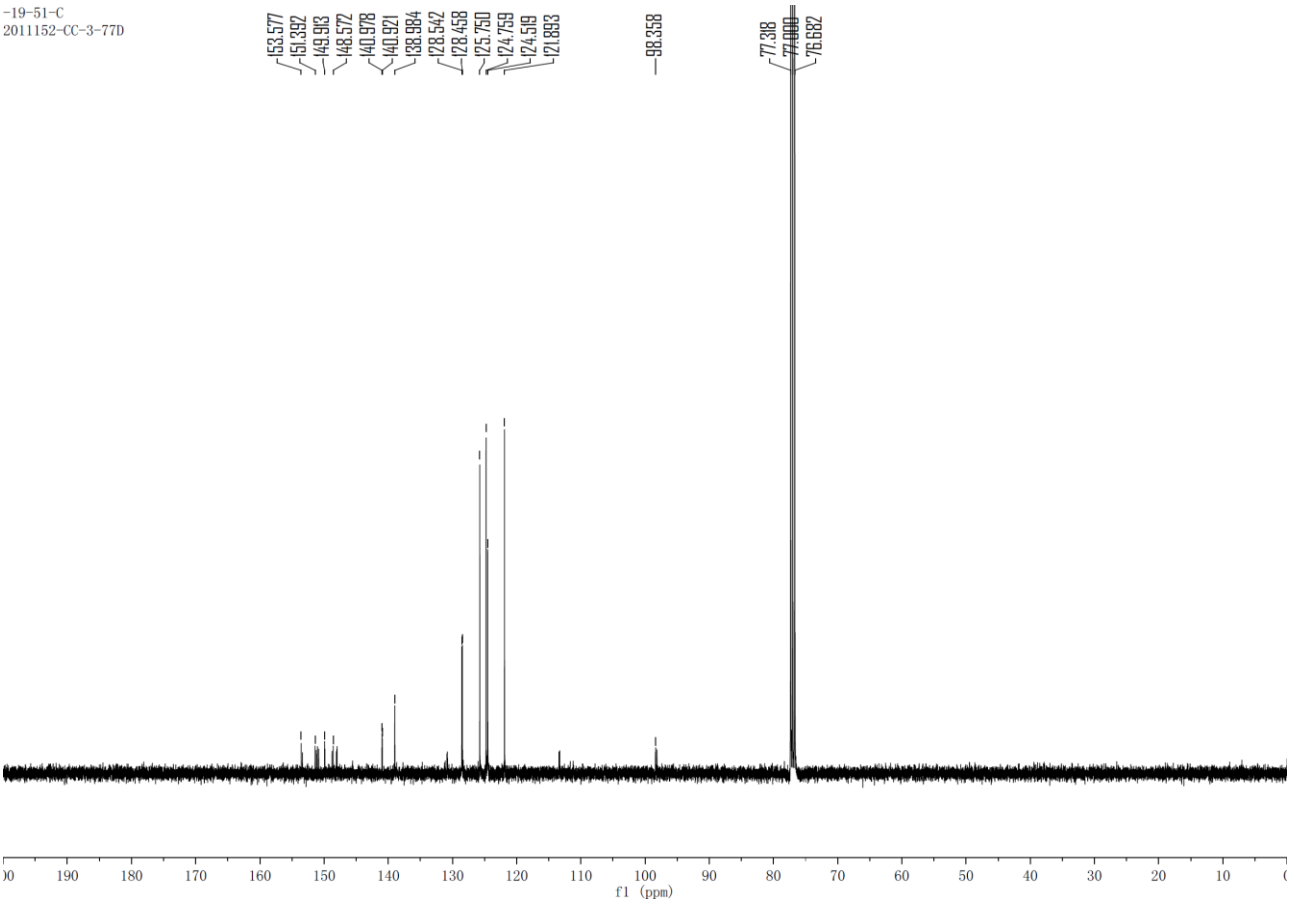

4-(Benzofuran-2-yl)-7-bromo-5,6-difluorobenzo[c][1,2,5]thiadiazole (3l).

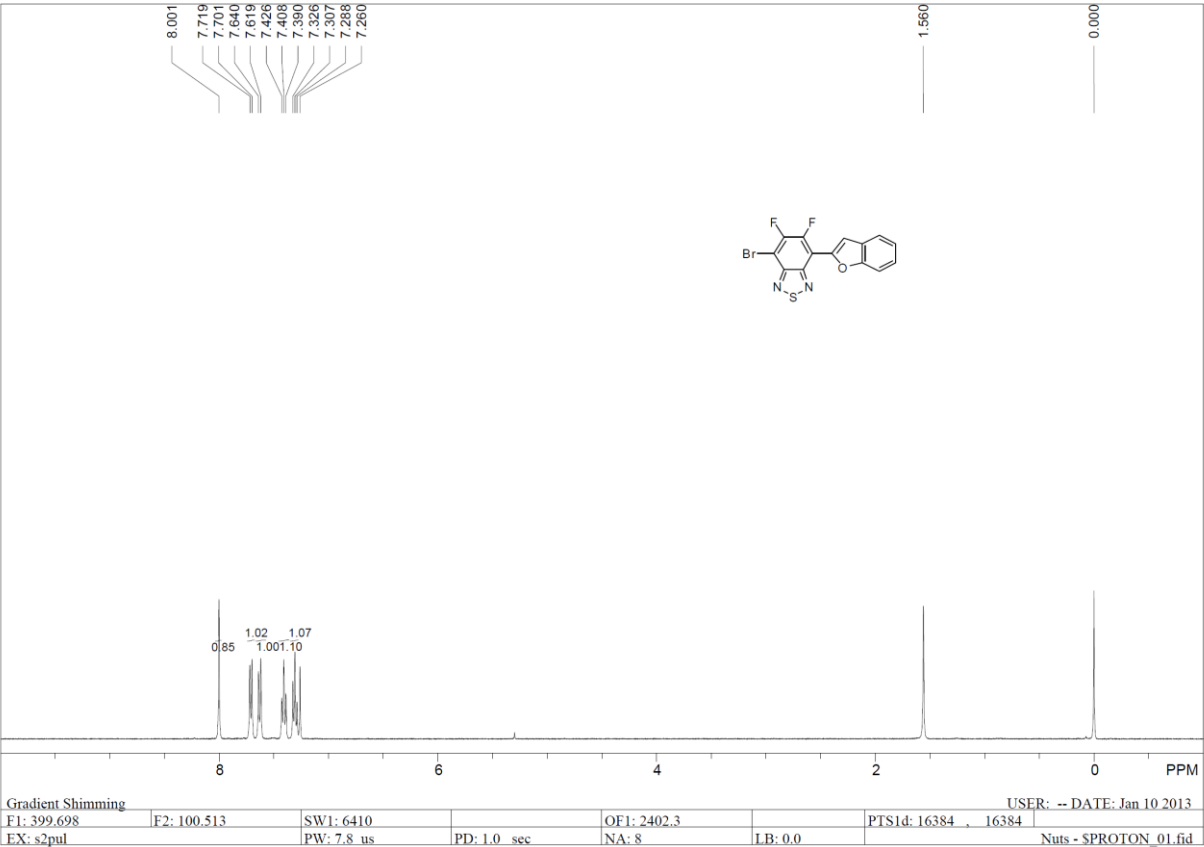



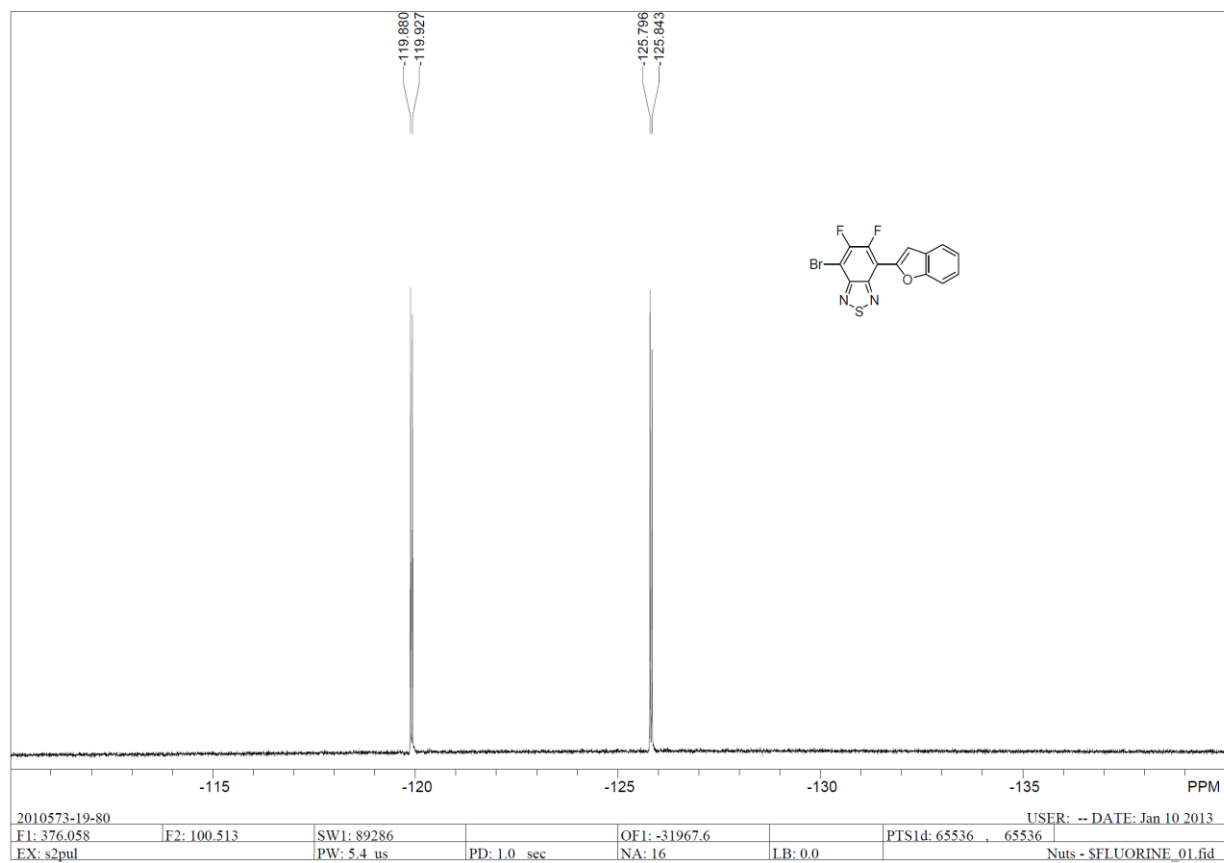

**4-([2,2'-Bithiophen]-5-yl)-7-bromo-5,6-difluorobenzo[c][1,2,5]thiadiazole (3m).**

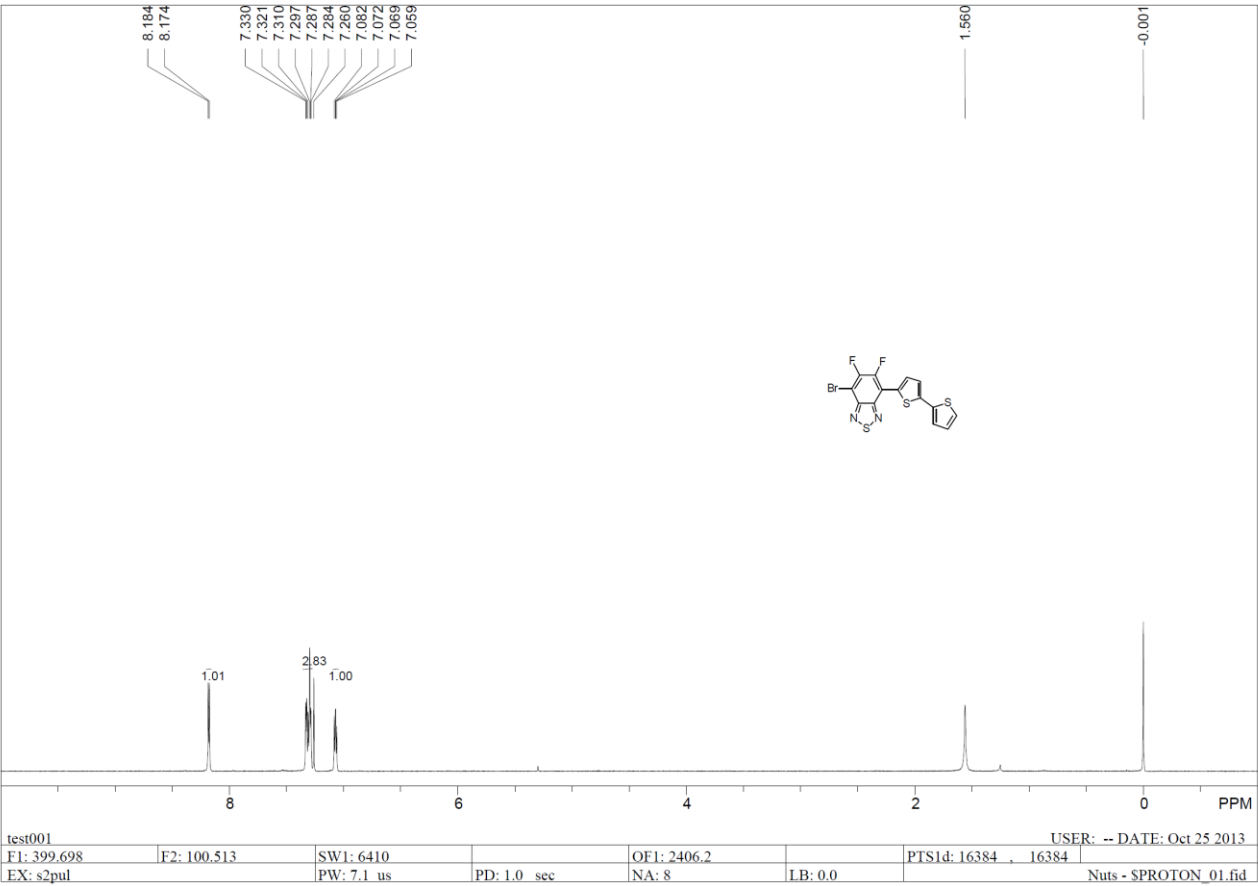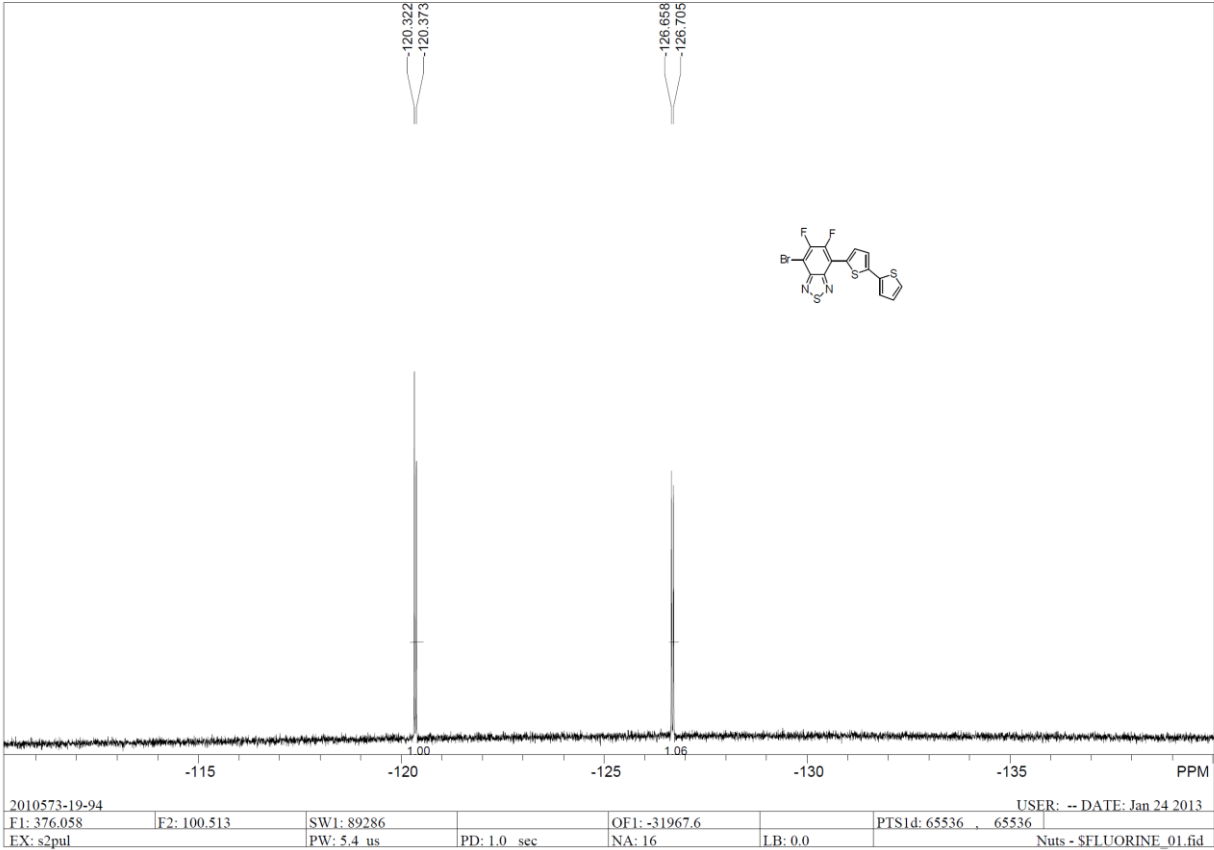

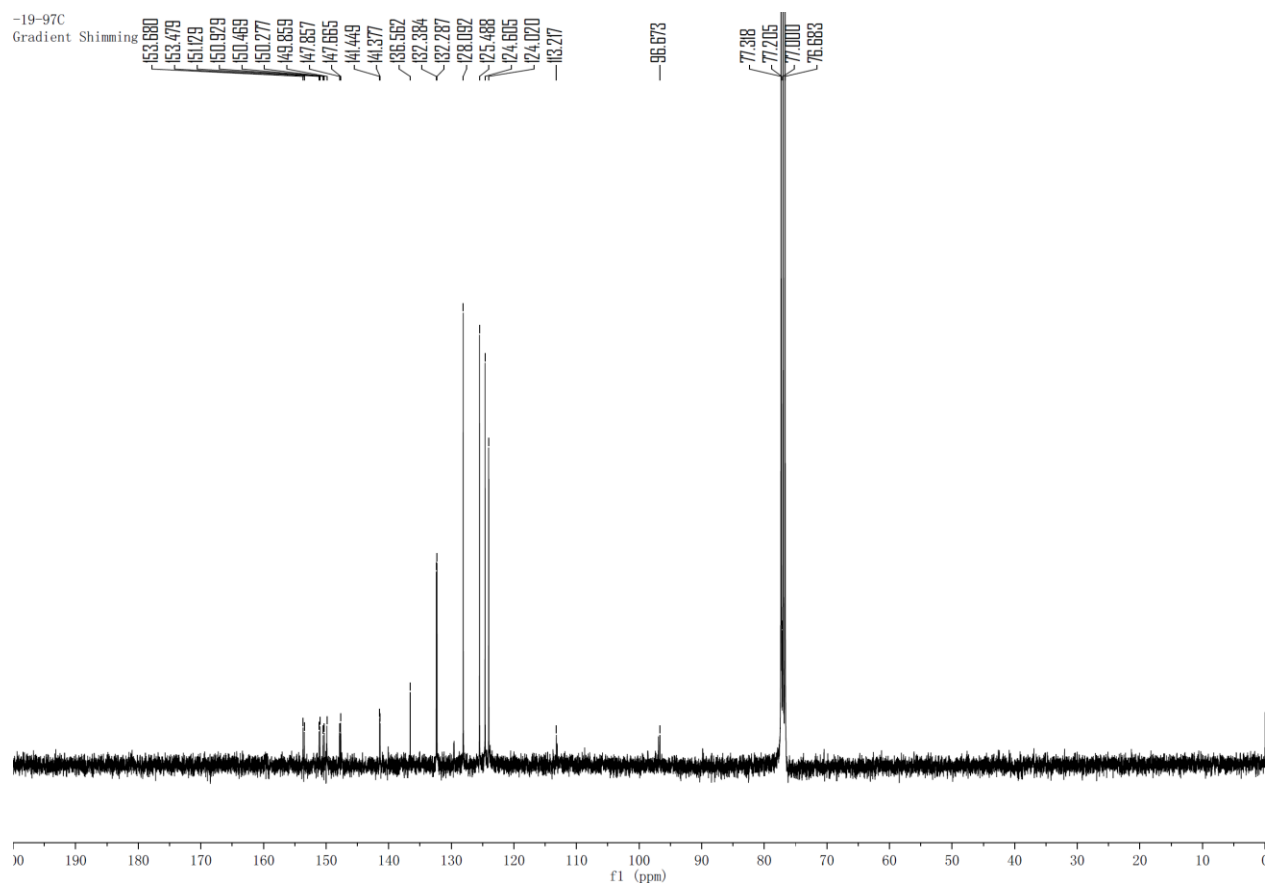

**3-(5-(7-Bromo-5,6-difluorobenzo[c][1,2,5]thiadiazol-4-yl)thiophen-2-yl)-2,5-dioctyl-6-(thiophen-2-yl)pyrrolo[3,4-c]pyrrole-1,4(2H,5H)-dione (3n).**

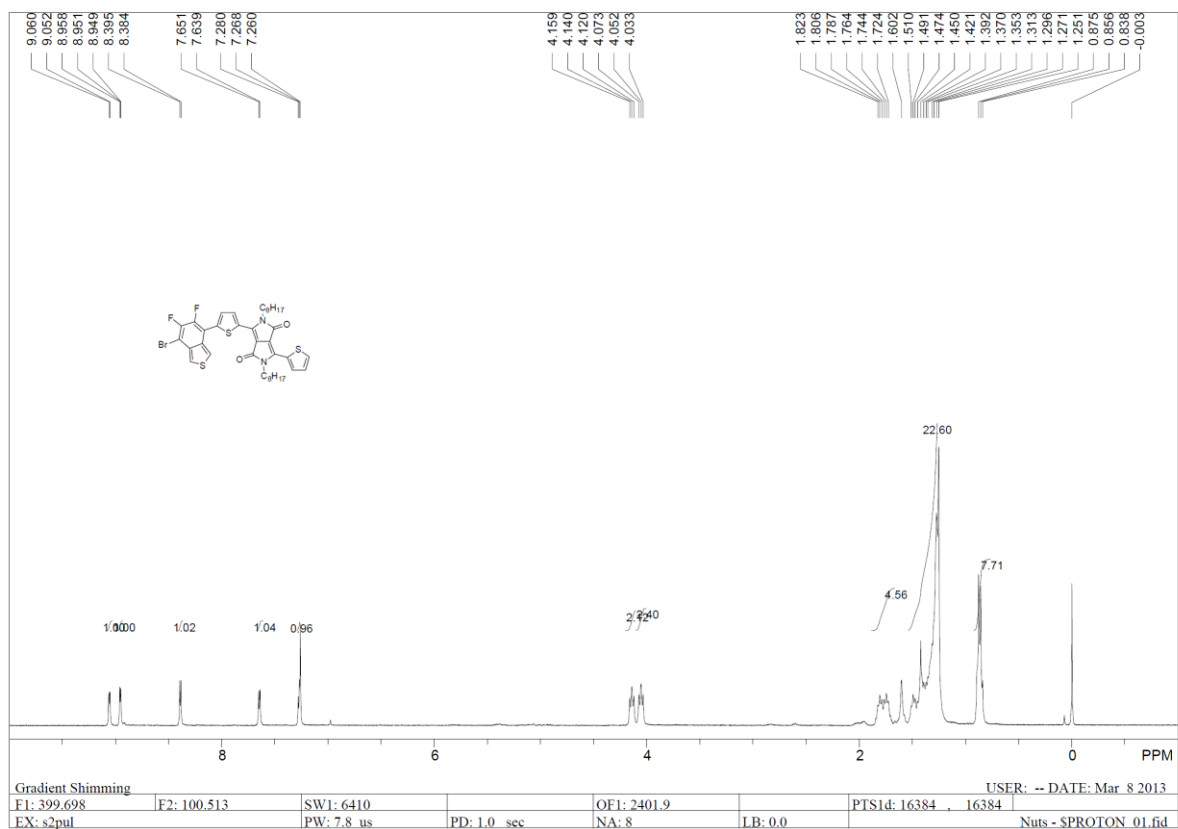

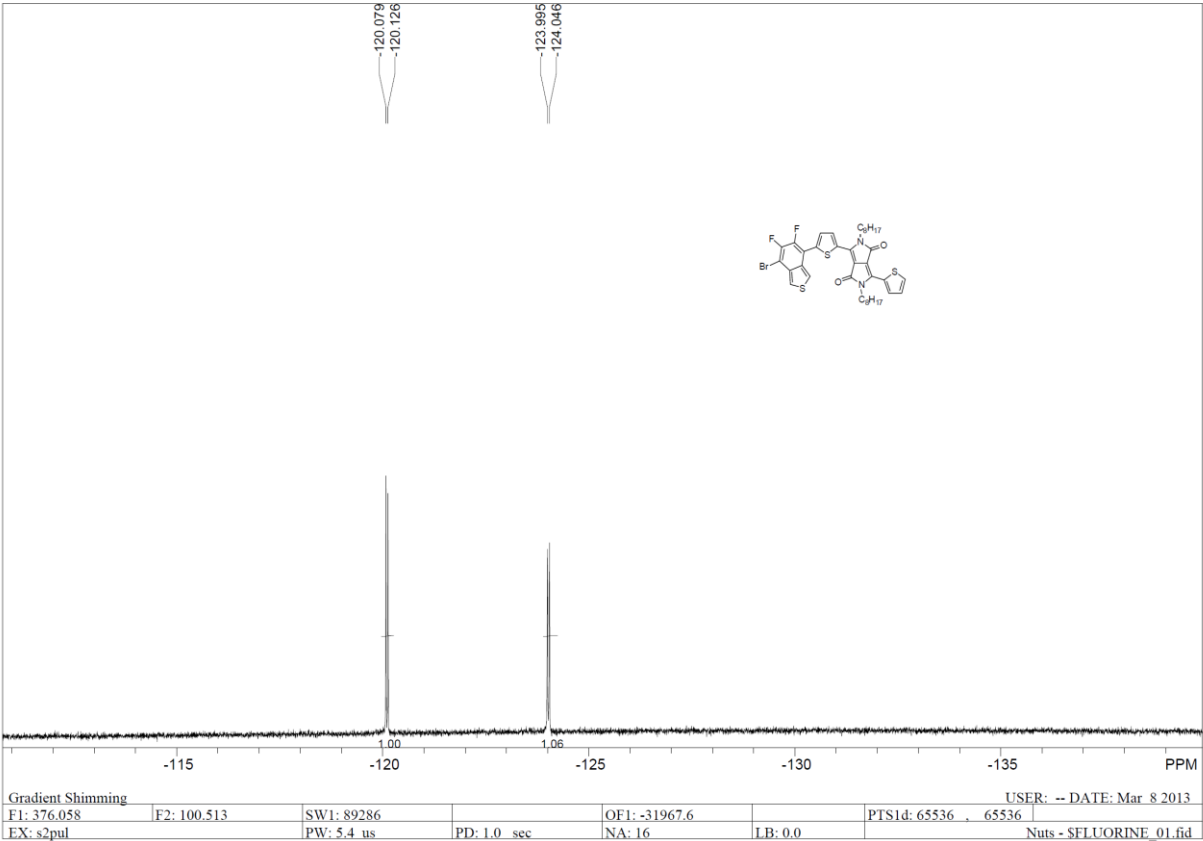

4-Bromo-7-(5-bromo-4-hexylthiophen-2-yl)-5,6-difluoro-2-octyl-2H-benzo[d][1,2,3]triazole (3o).

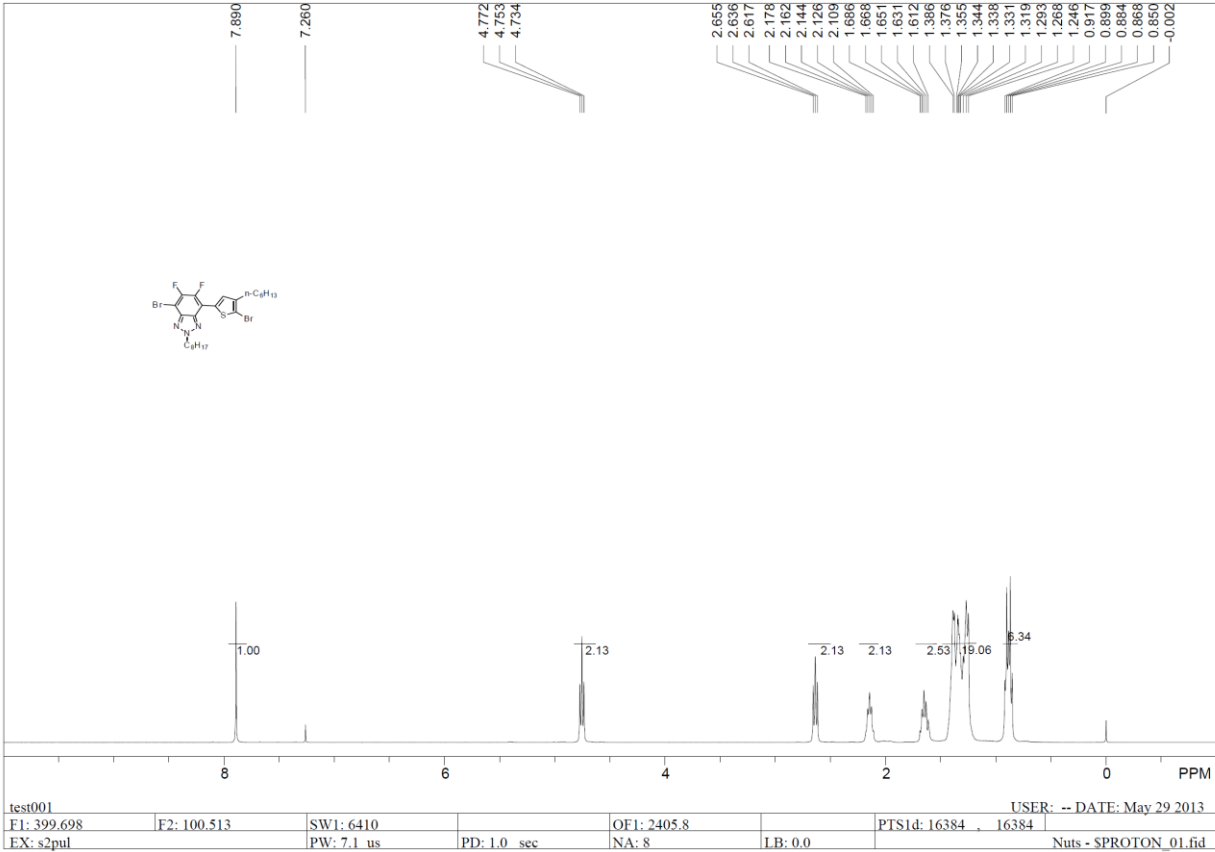

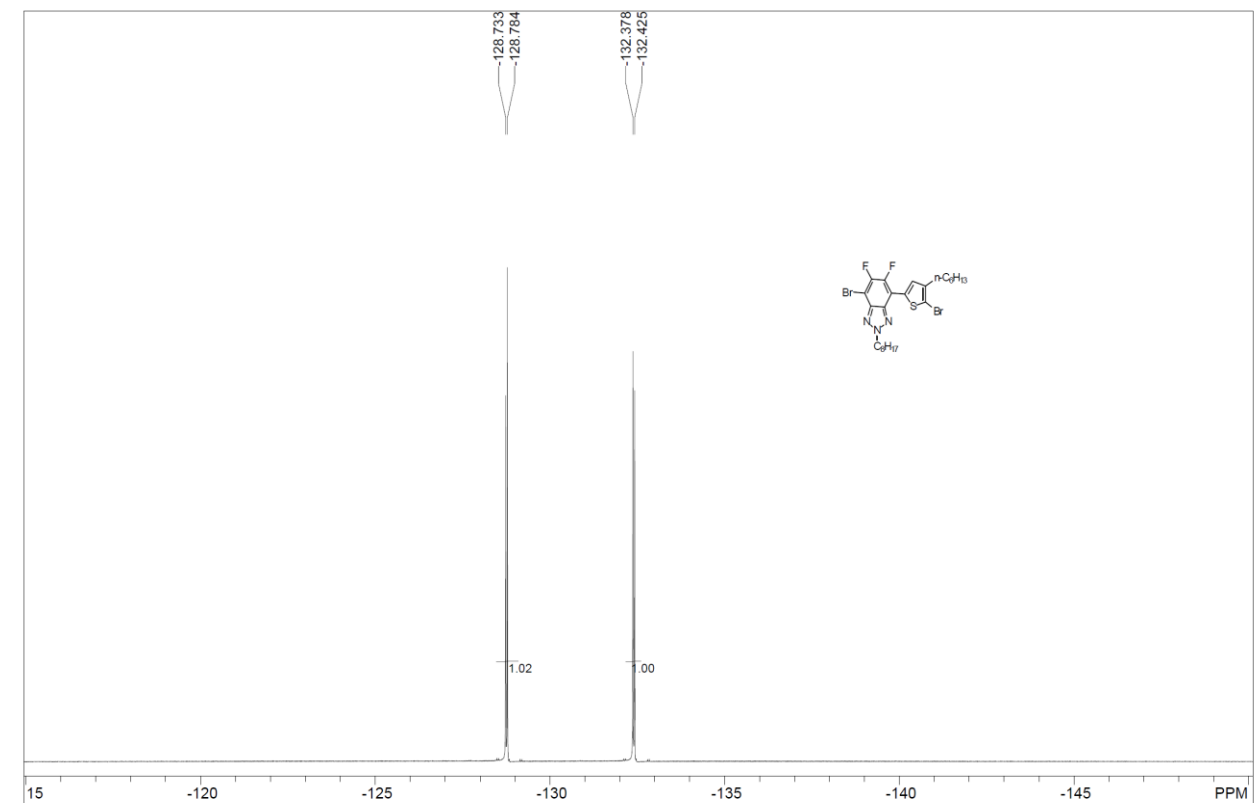

|             |             |            |             |               |         |                            |       |
|-------------|-------------|------------|-------------|---------------|---------|----------------------------|-------|
| test001     |             |            |             |               |         | USER: -- DATE: May 29 2013 |       |
| F1: 376.057 | F2: 100.513 | SW1: 89286 |             | OF1: -31967.5 |         | PTS1d: 65536               | 65536 |
| EX: s2pul   |             | PW: 5.4 us | PD: 1.0 sec | NA: 16        | LB: 0.0 | Nuts - SFLUORINE_01.fid    |       |

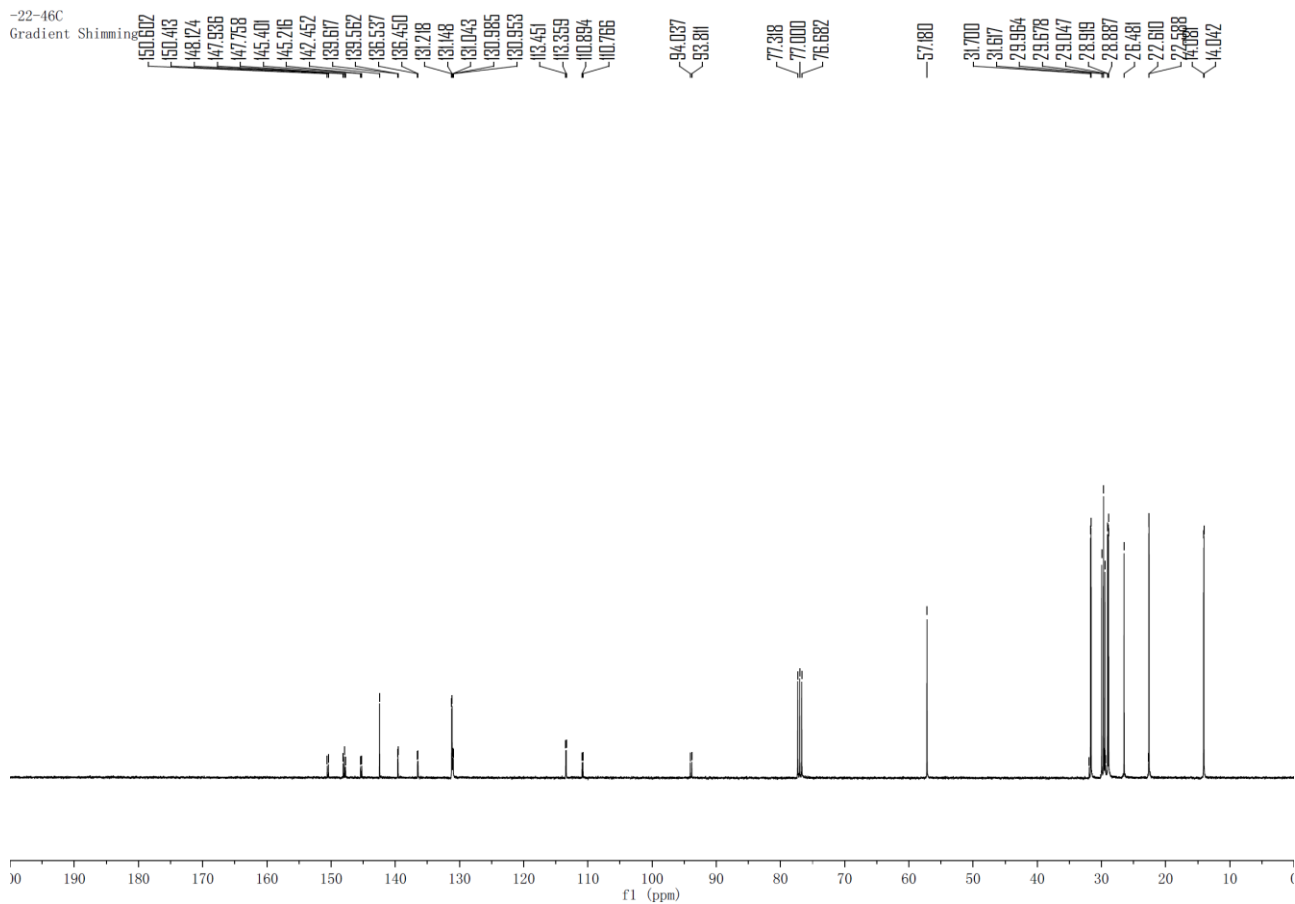

**4-Bromo-7-(5-bromothiophen-2-yl)-5,6-difluoro-2-octyl-2H-benzo[d][1,2,3]triazole (3p).**

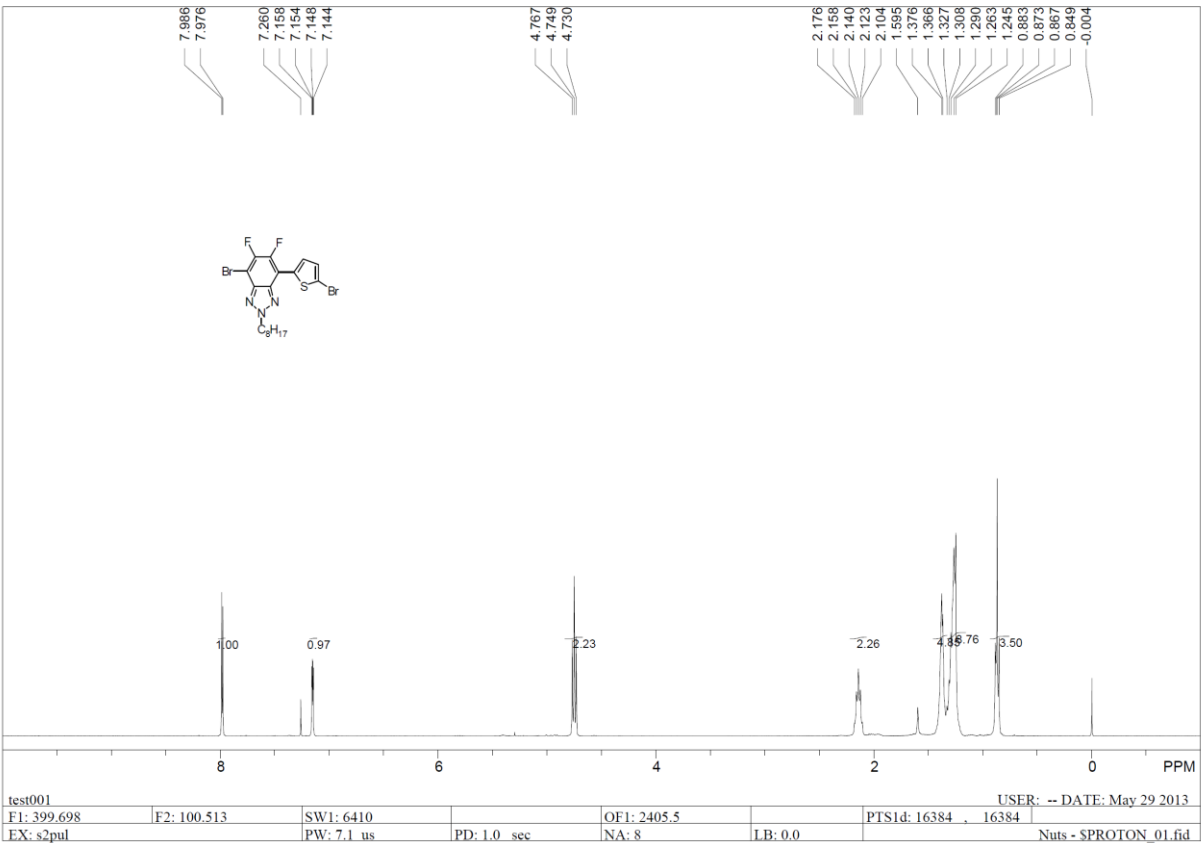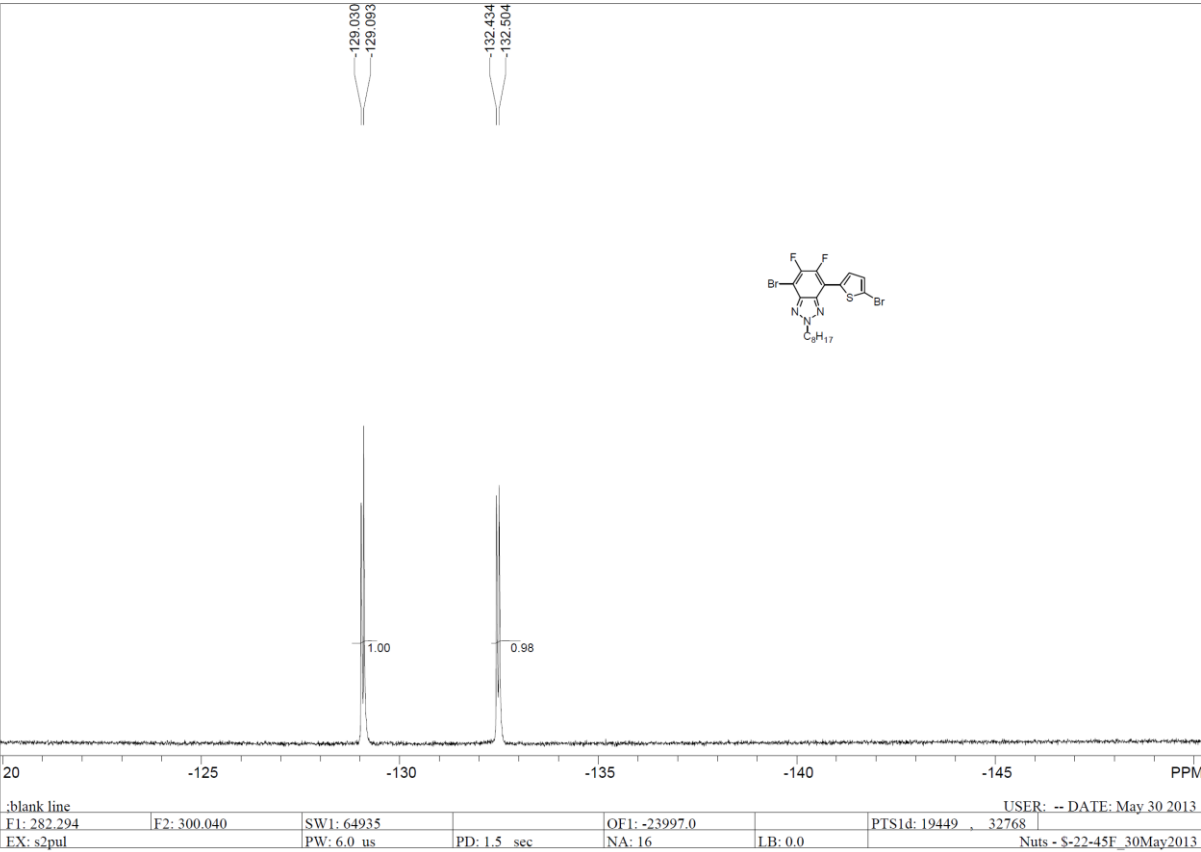

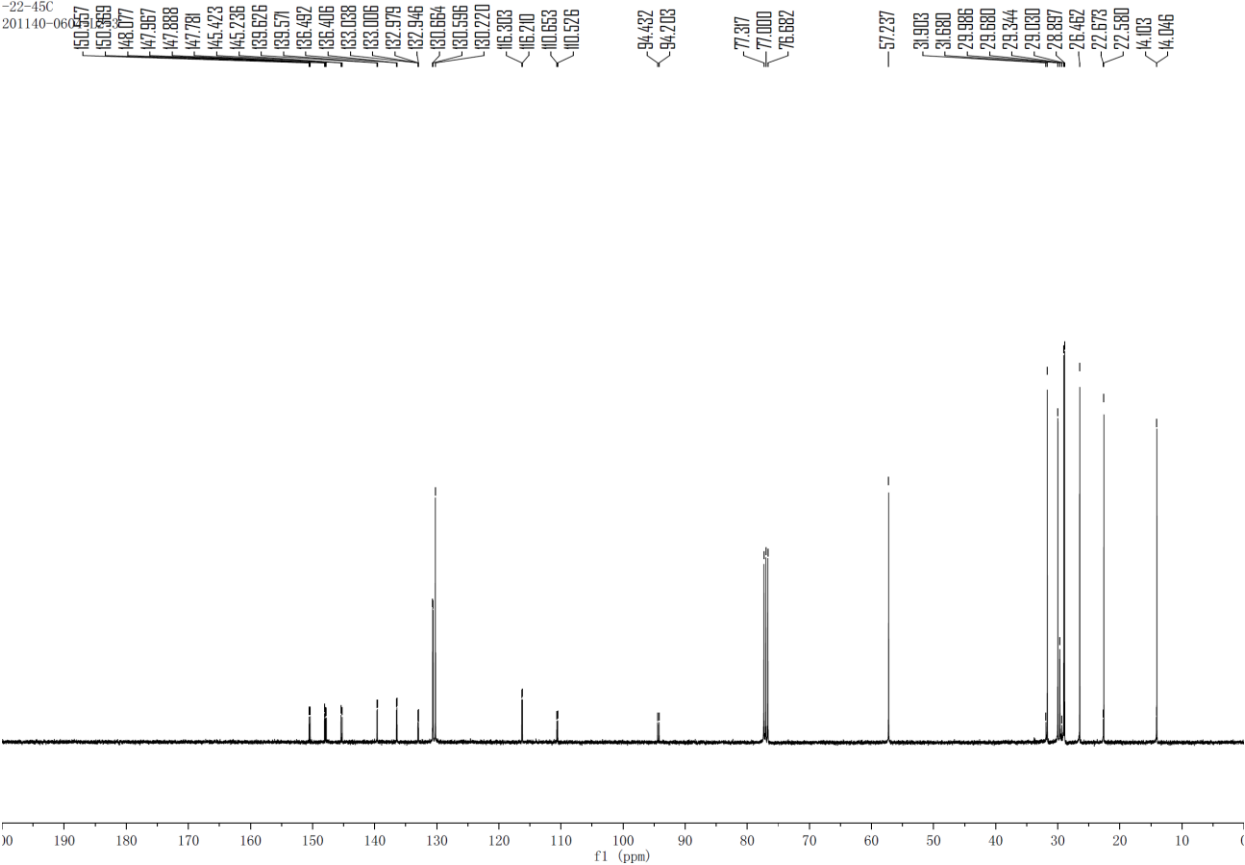

5-(7-Bromo-5,6-difluoro-2-octyl-2H-benzo[d][1,2,3]triazol-4-yl)thiophene-2-carbaldehyde(3q).

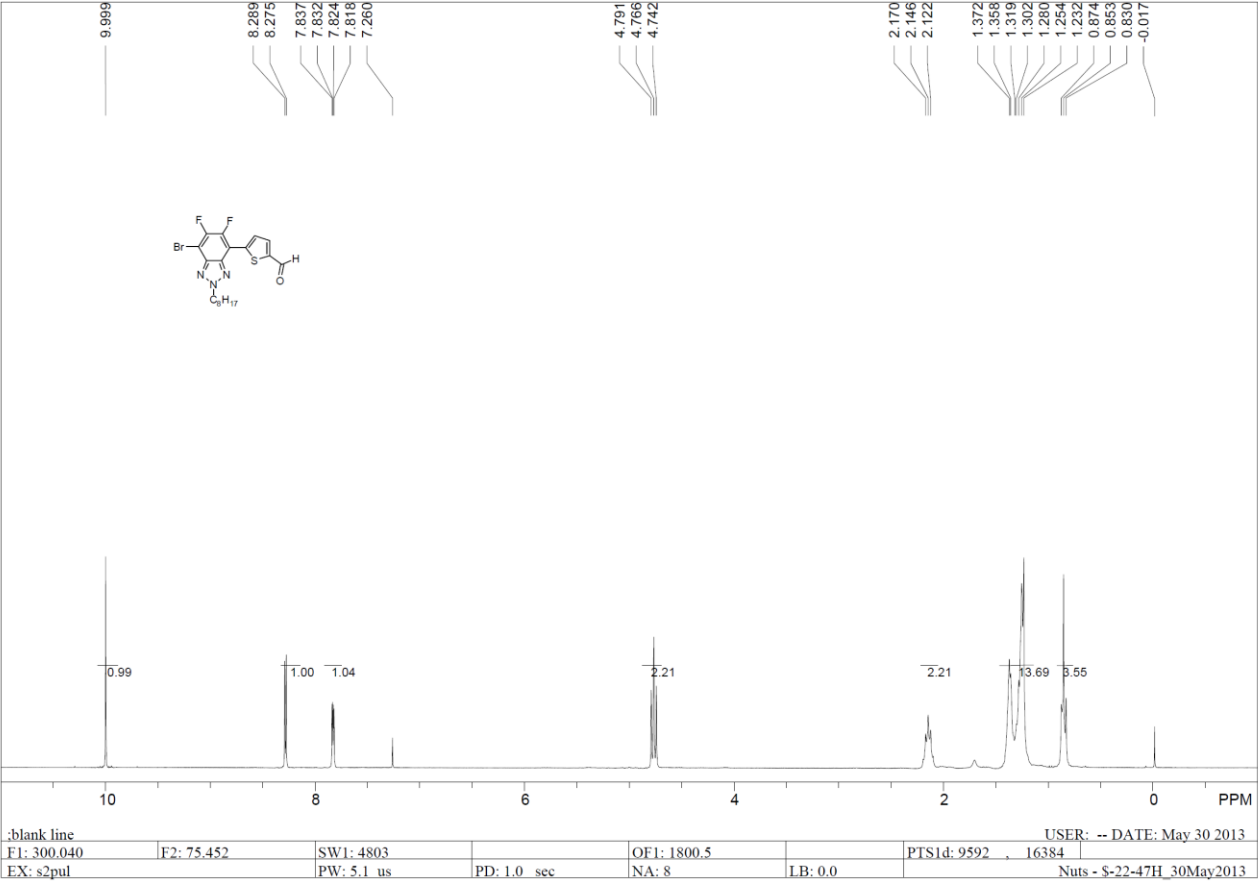

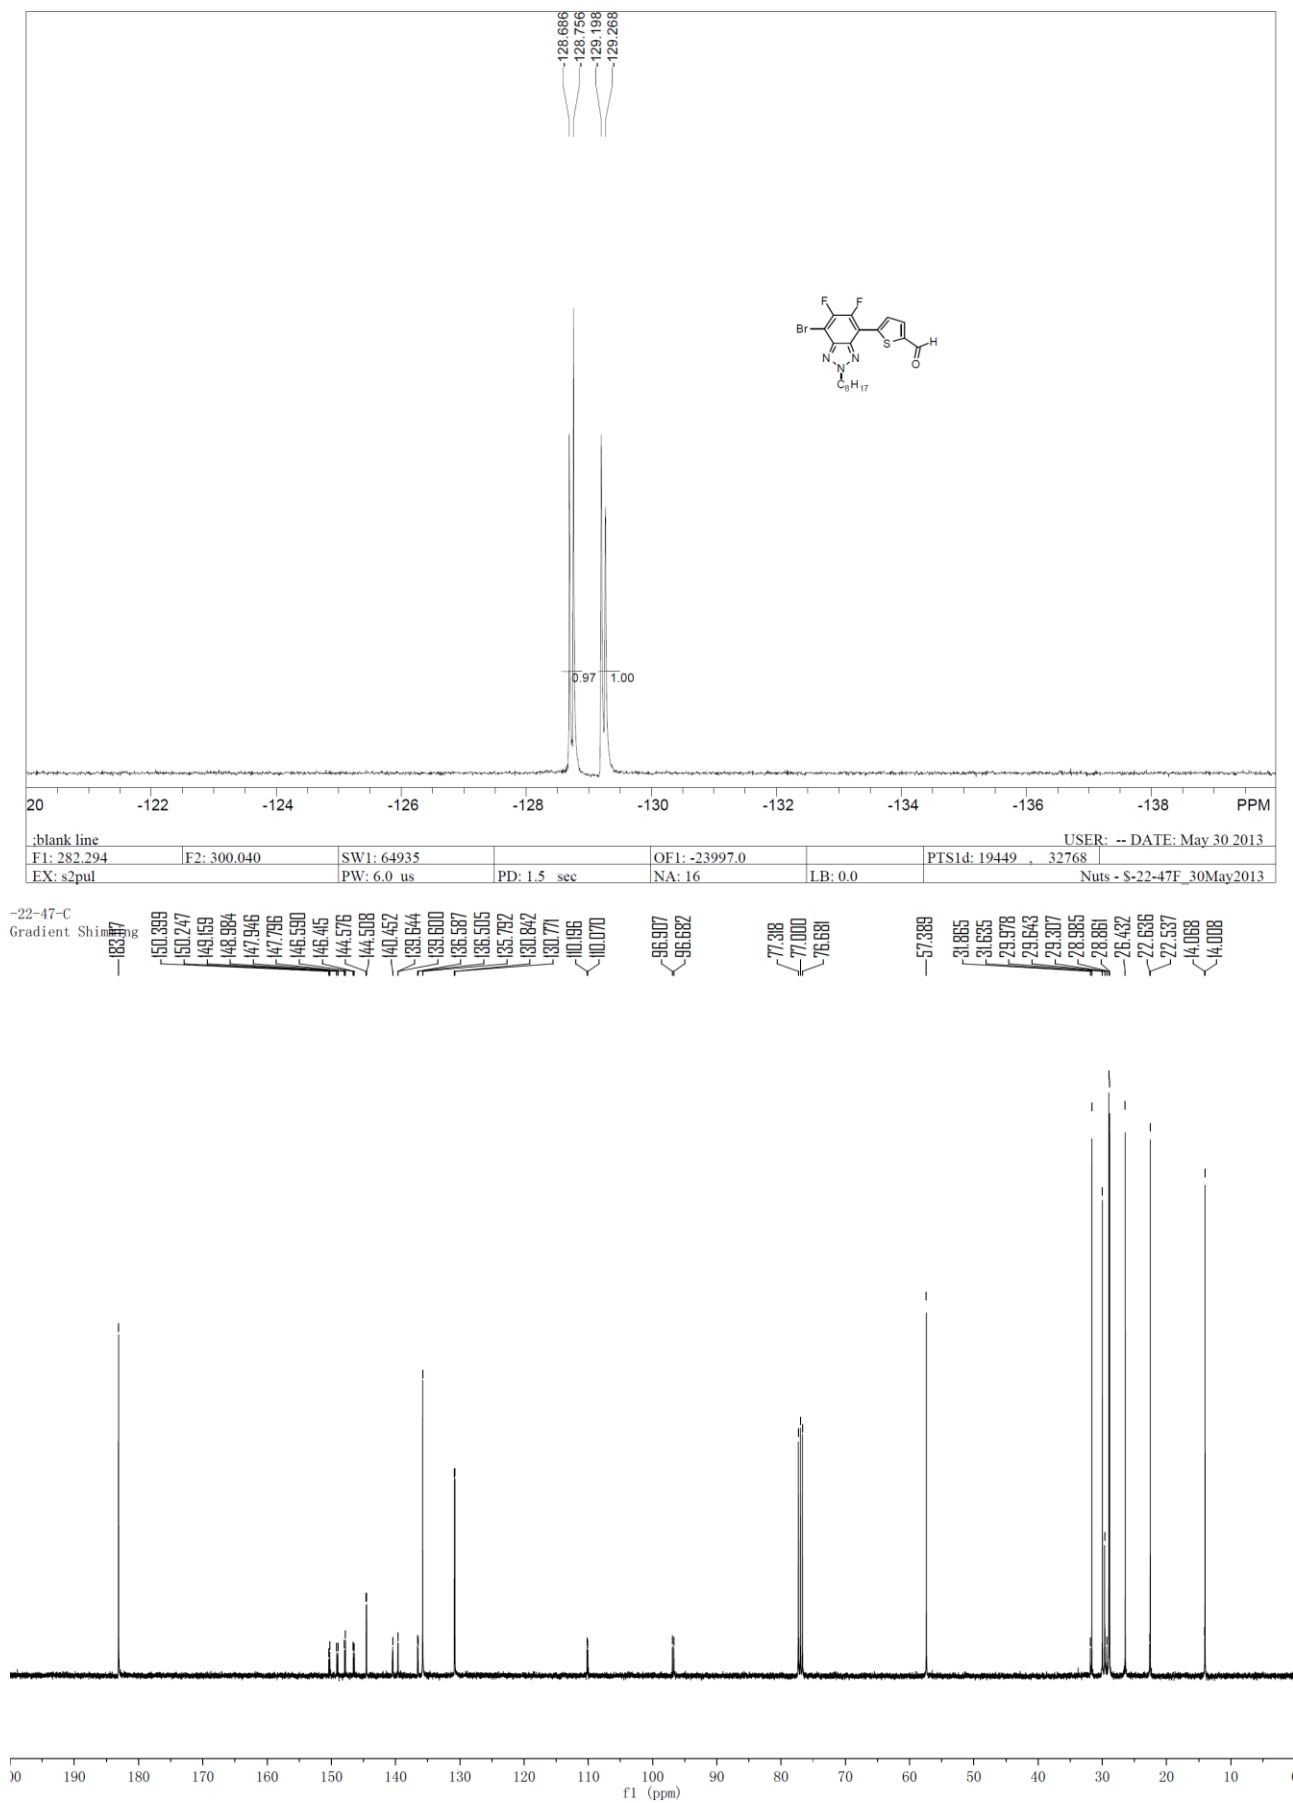



**4,7-bis(5-bromo-4-hexylthiophen-2-yl)-5,6-difluorobenzo[c][1,2,5]thiadiazole (6a).**

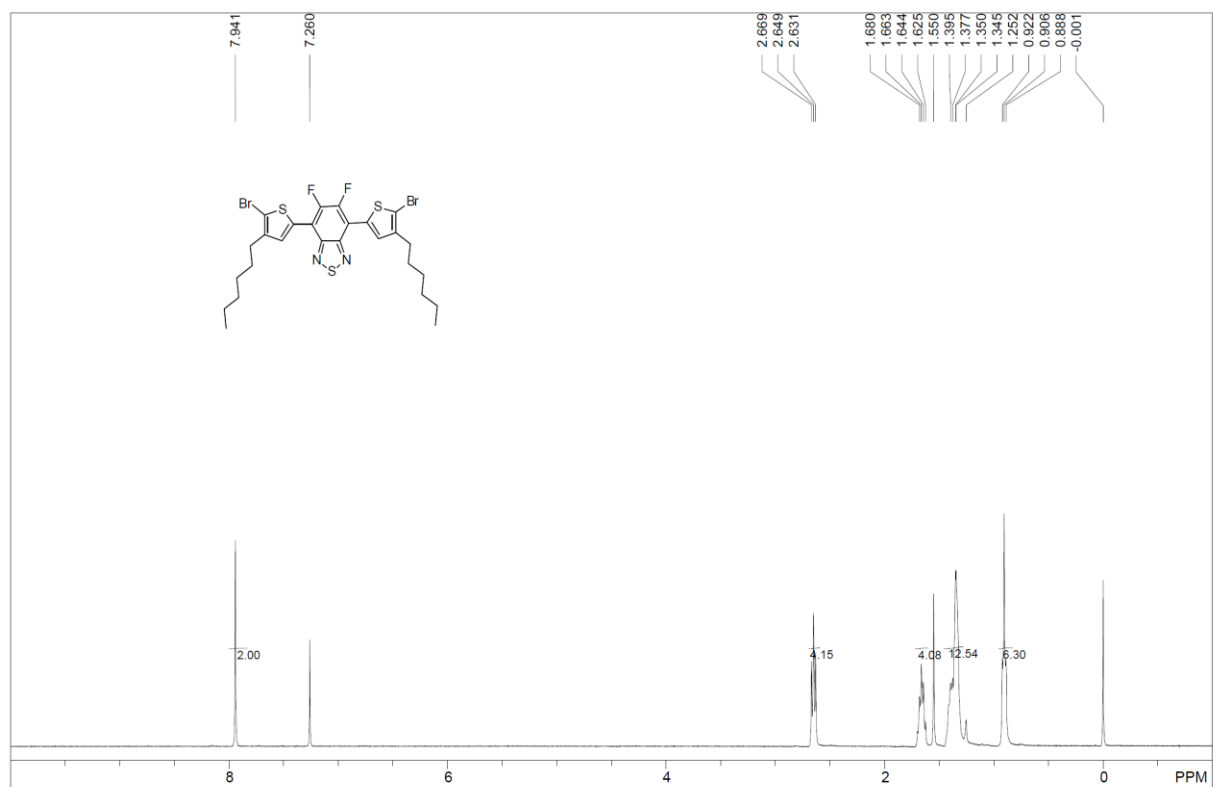

|                 |             |            |             |             |         |                            |  |
|-----------------|-------------|------------|-------------|-------------|---------|----------------------------|--|
| 2010573-19-65-1 |             |            |             |             |         | USER: -- DATE: Dec 29 2012 |  |
| F1: 399.698     | F2: 100.513 | SW1: 6410  |             | OF1: 2399.6 |         | PTS1d: 16384 , 16384       |  |
| EX: s2pul       |             | PW: 7.8 us | PD: 1.0 sec | NA: 8       | LB: 0.0 | Nuts - SPROTON_01.fid      |  |

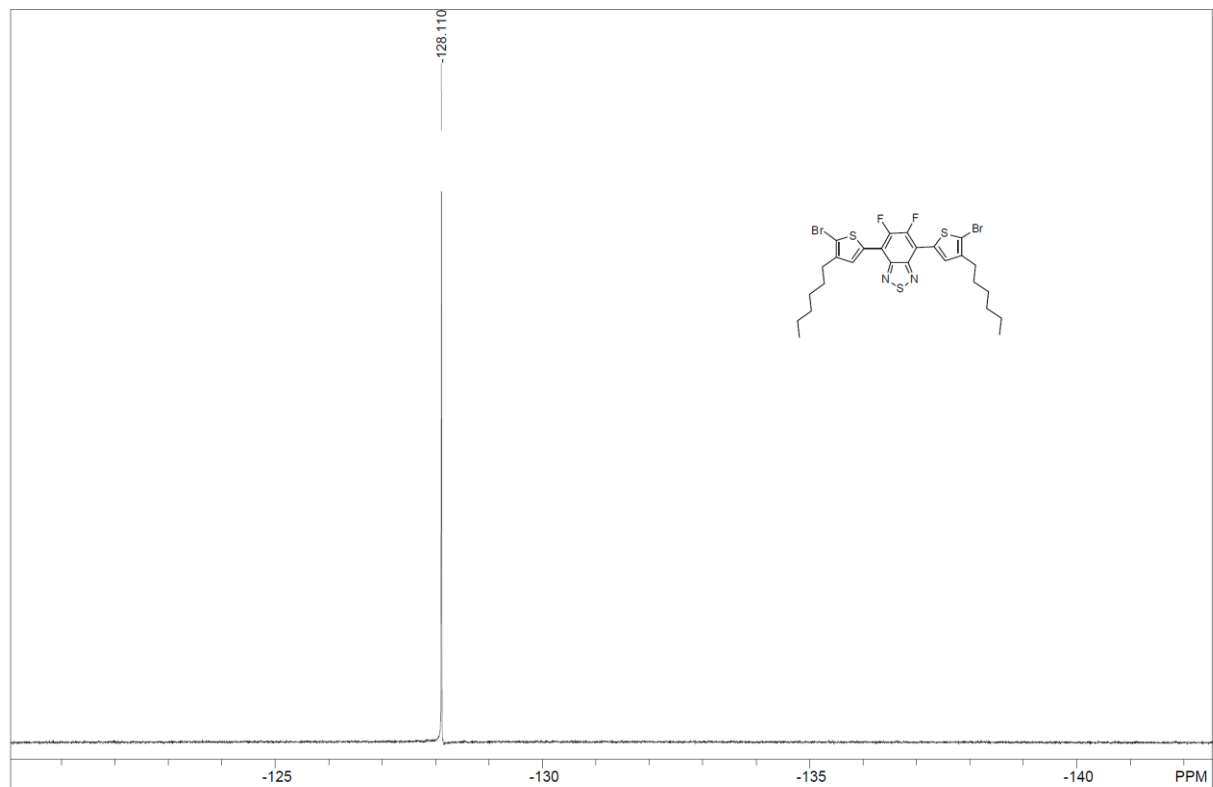

|                   |             |            |             |               |         |                            |  |
|-------------------|-------------|------------|-------------|---------------|---------|----------------------------|--|
| Gradient Shimming |             |            |             |               |         | USER: -- DATE: Dec 29 2012 |  |
| F1: 376.058       | F2: 100.513 | SW1: 89286 |             | OF1: -31967.6 |         | PTS1d: 65536 , 65536       |  |
| EX: s2pul         |             | PW: 5.4 us | PD: 1.0 sec | NA: 16        | LB: 0.0 | Nuts - SFLUORINE_01.fid    |  |

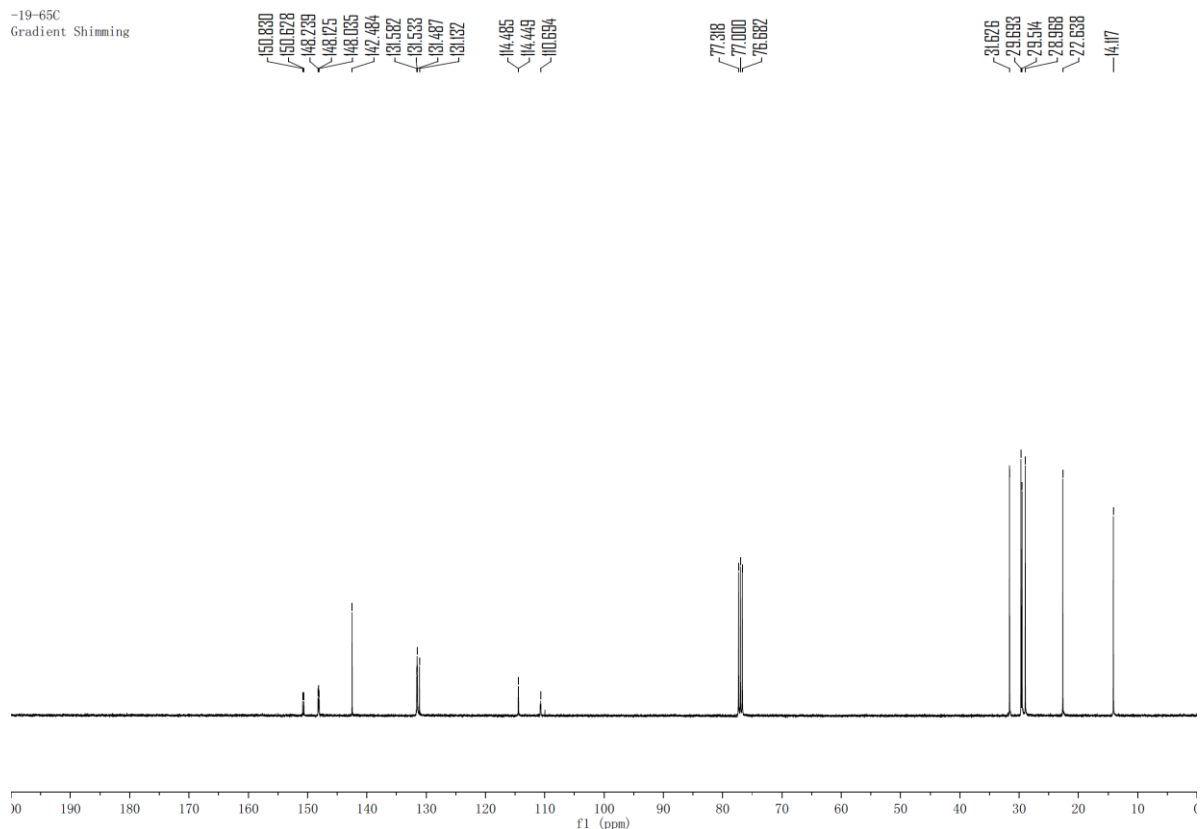

**4,4'-(5,5'-(5,6-difluorobenzo[c][1,2,5]thiadiazole-4,7-diyl)bis(3-hexylthiophene-5,2-diyl))bis(N,N-diphenylaniline) (6b).**

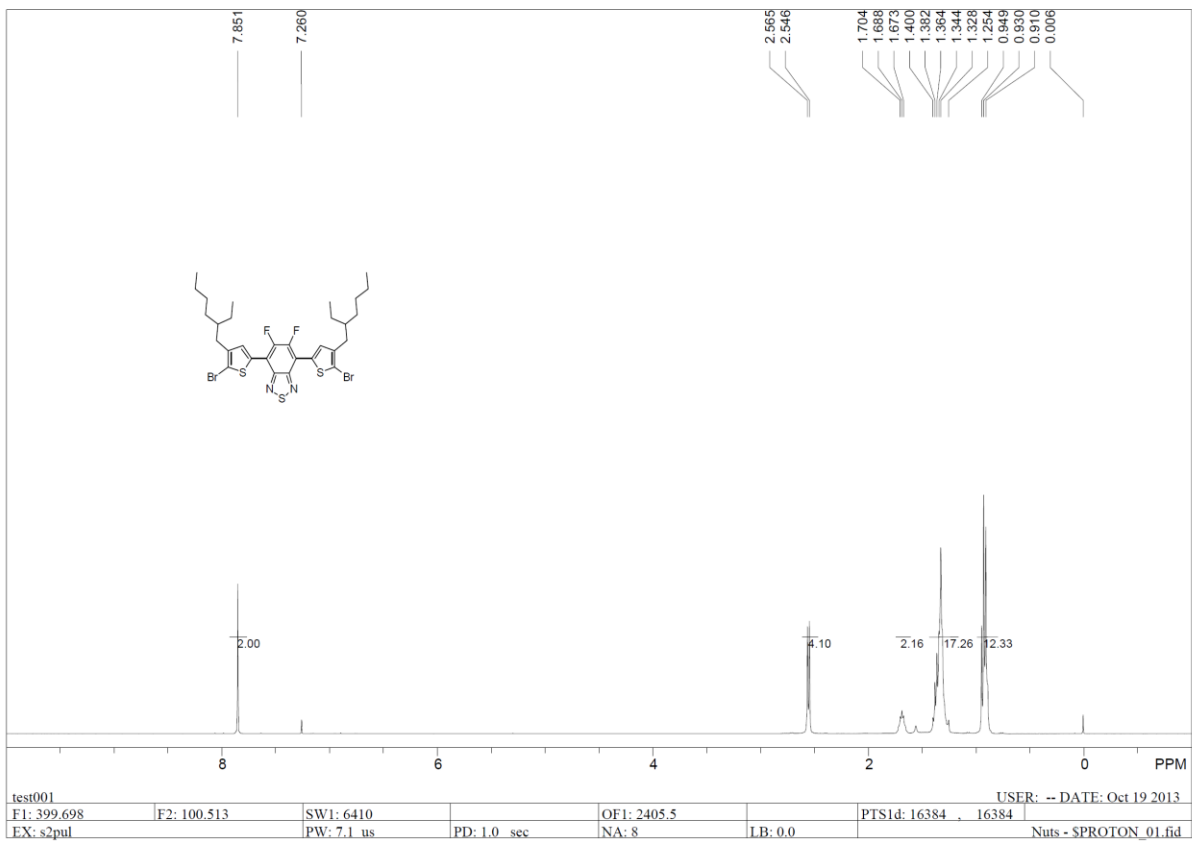

150.857  
150.657  
148.268  
148.141  
141.641  
132.182  
132.133  
132.088  
130.988  
115.149  
115.113  
115.077  
110.708  
77.317  
77.000  
76.682  
39.949  
33.683  
32.455  
29.699  
28.753  
25.681  
23.083  
14.152  
10.847

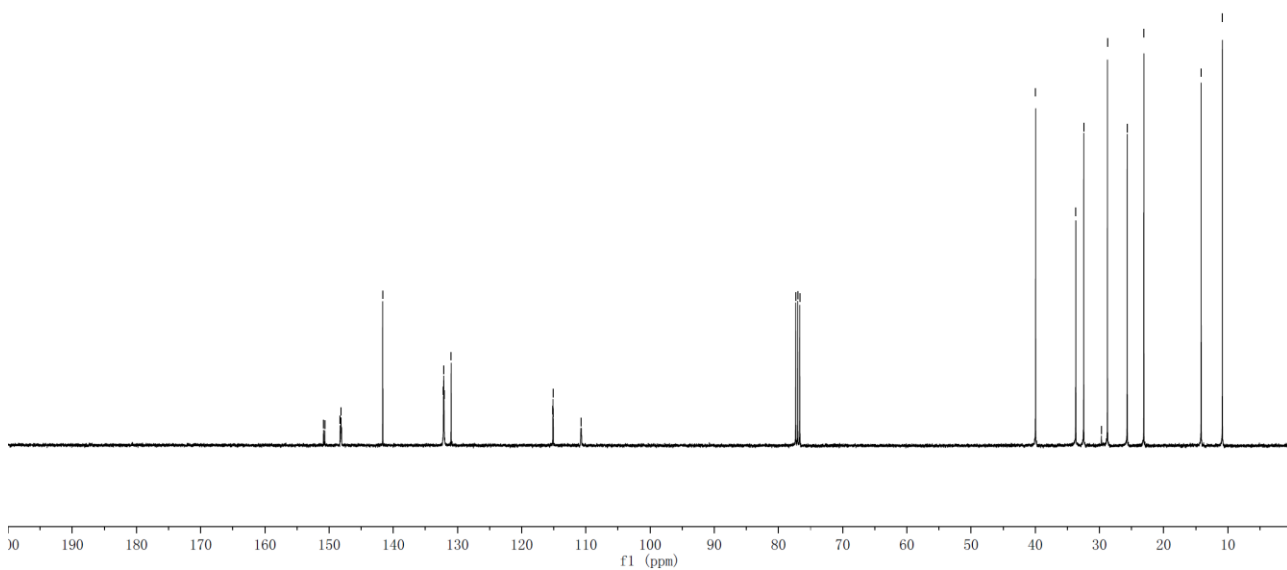

**4-(5-Bromo-4-hexylthiophen-2-yl)-5,6-difluorobenzo[c][1,2,5]thiadiazole (7a).**

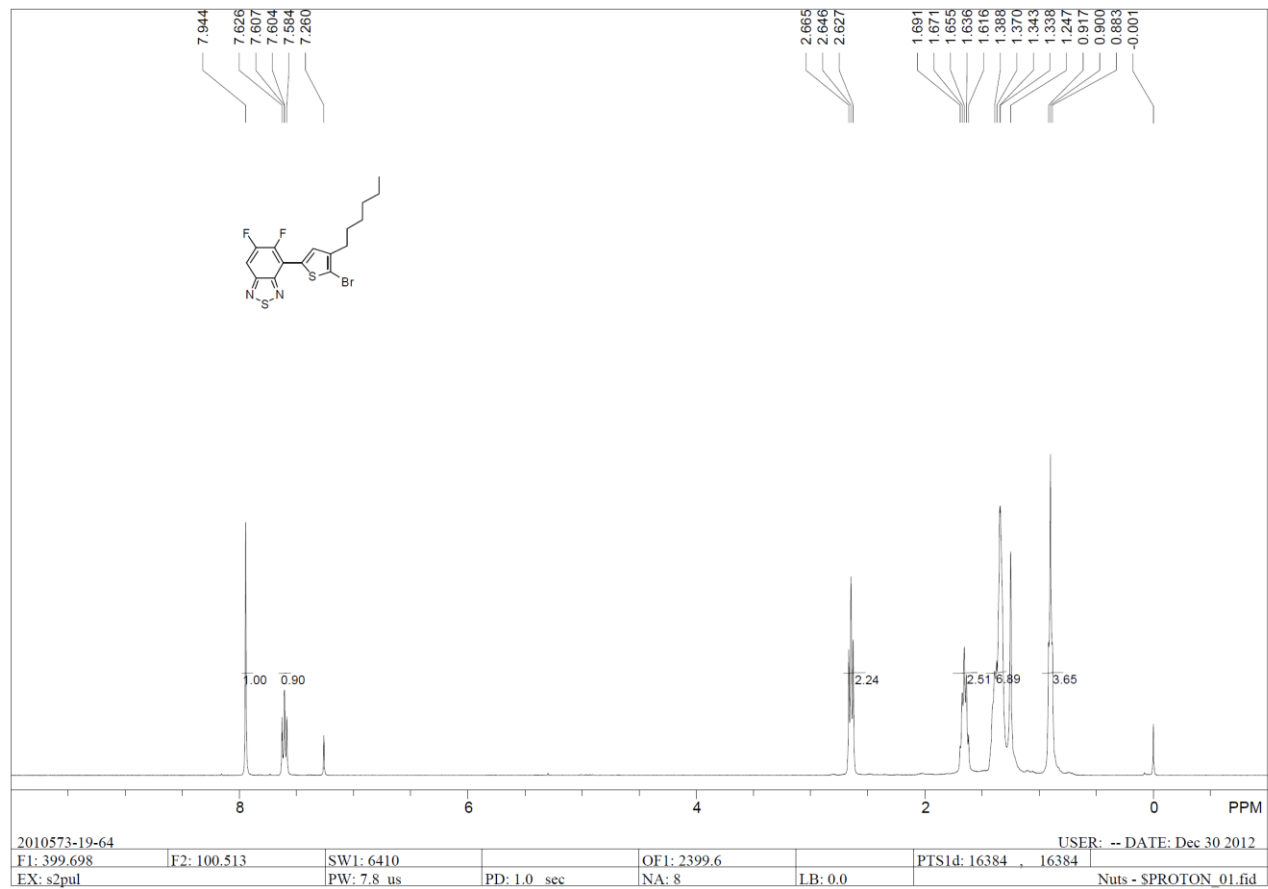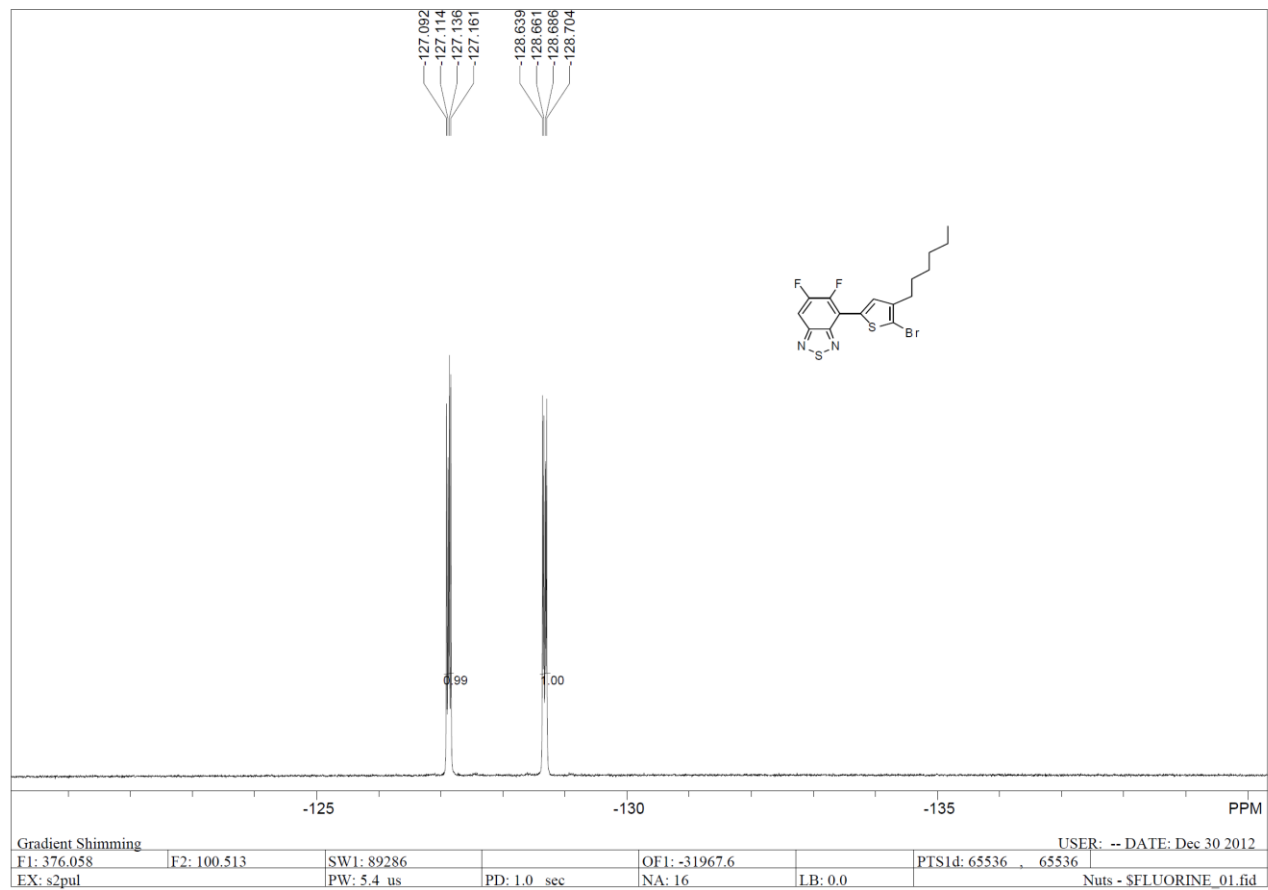

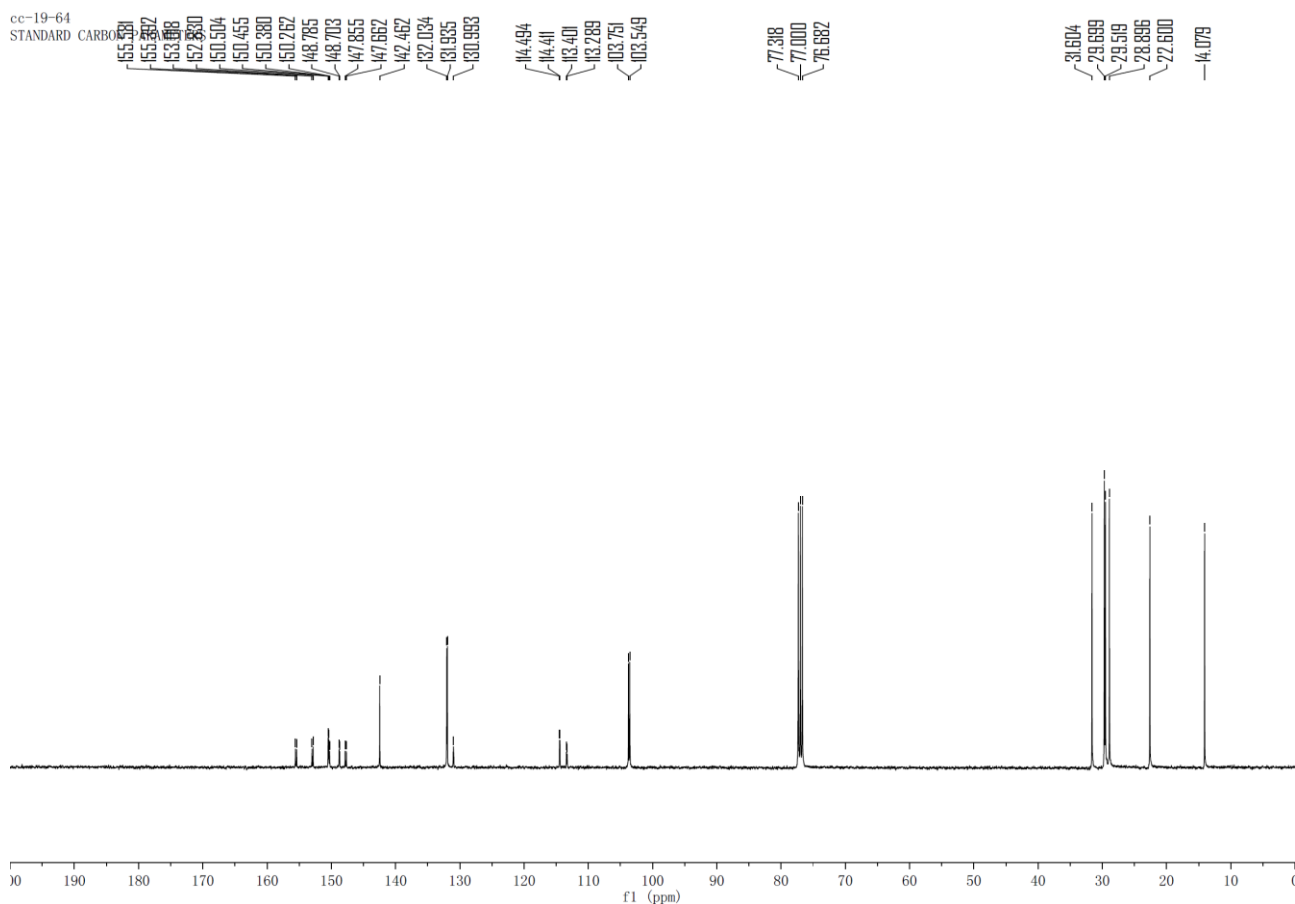

**5,6-Difluoro-4-(5-hexylthiophen-2-yl)benzo[c][1,2,5]thiadiazole(7c).**

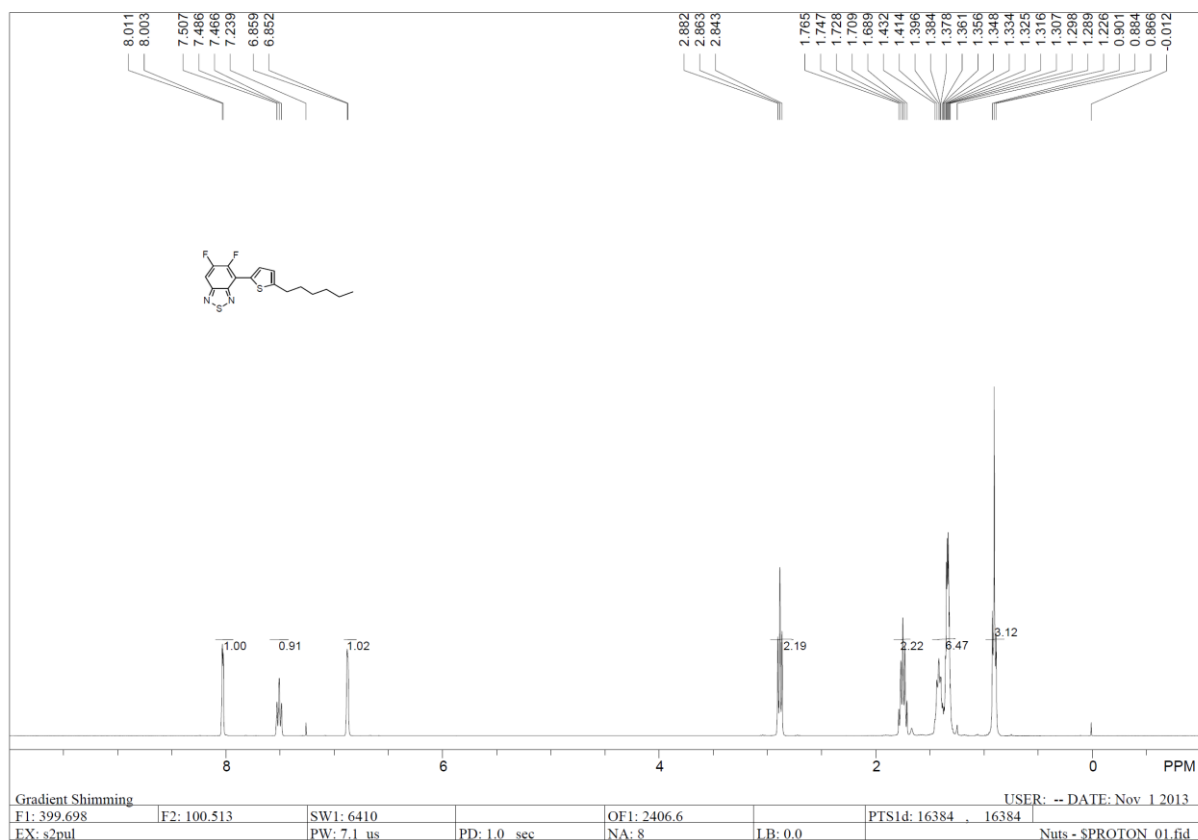

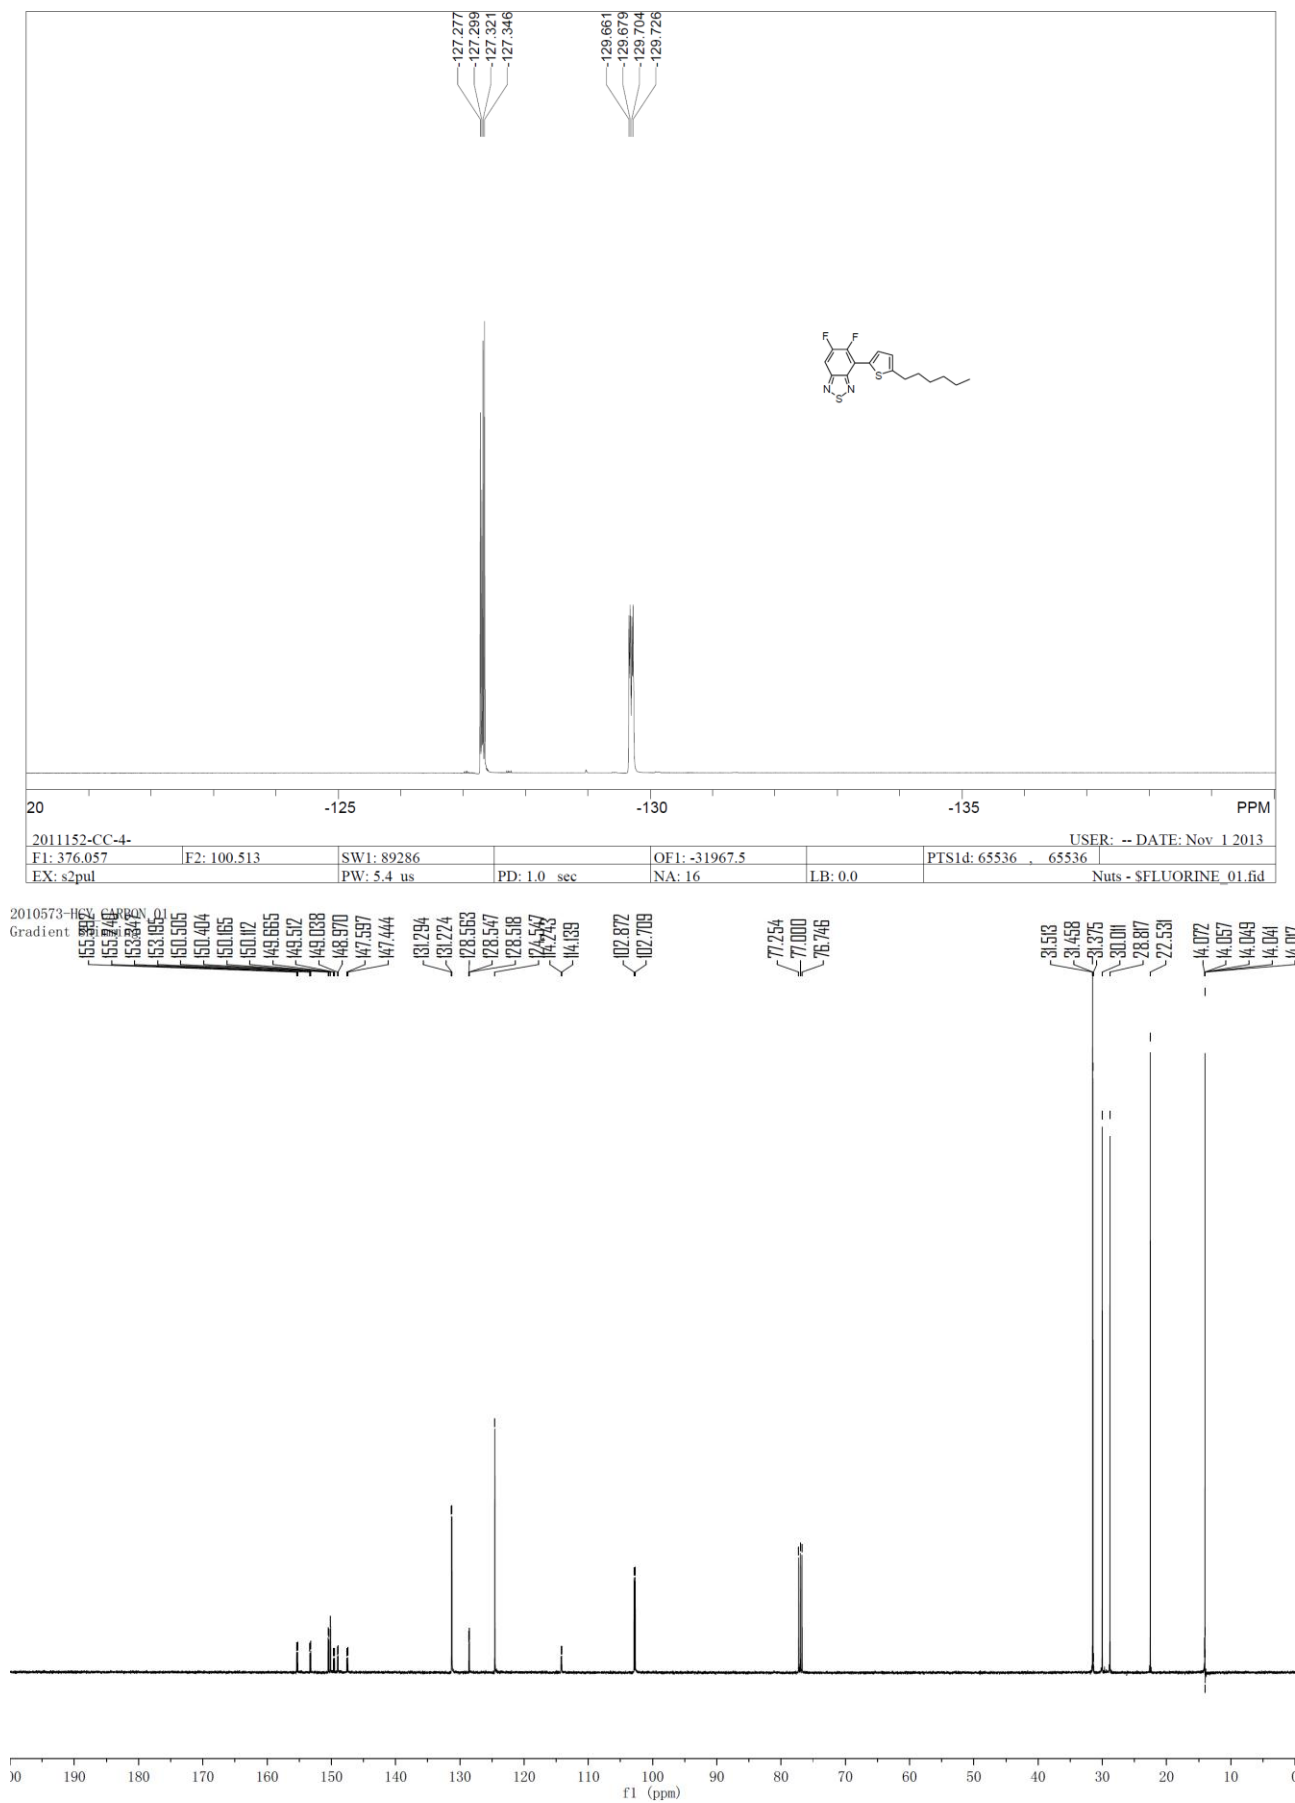

4-(5-Bromo-4-hexylthiophen-2-yl)-5-fluorobenzo[c][1,2,5]thiadiazole (9a).

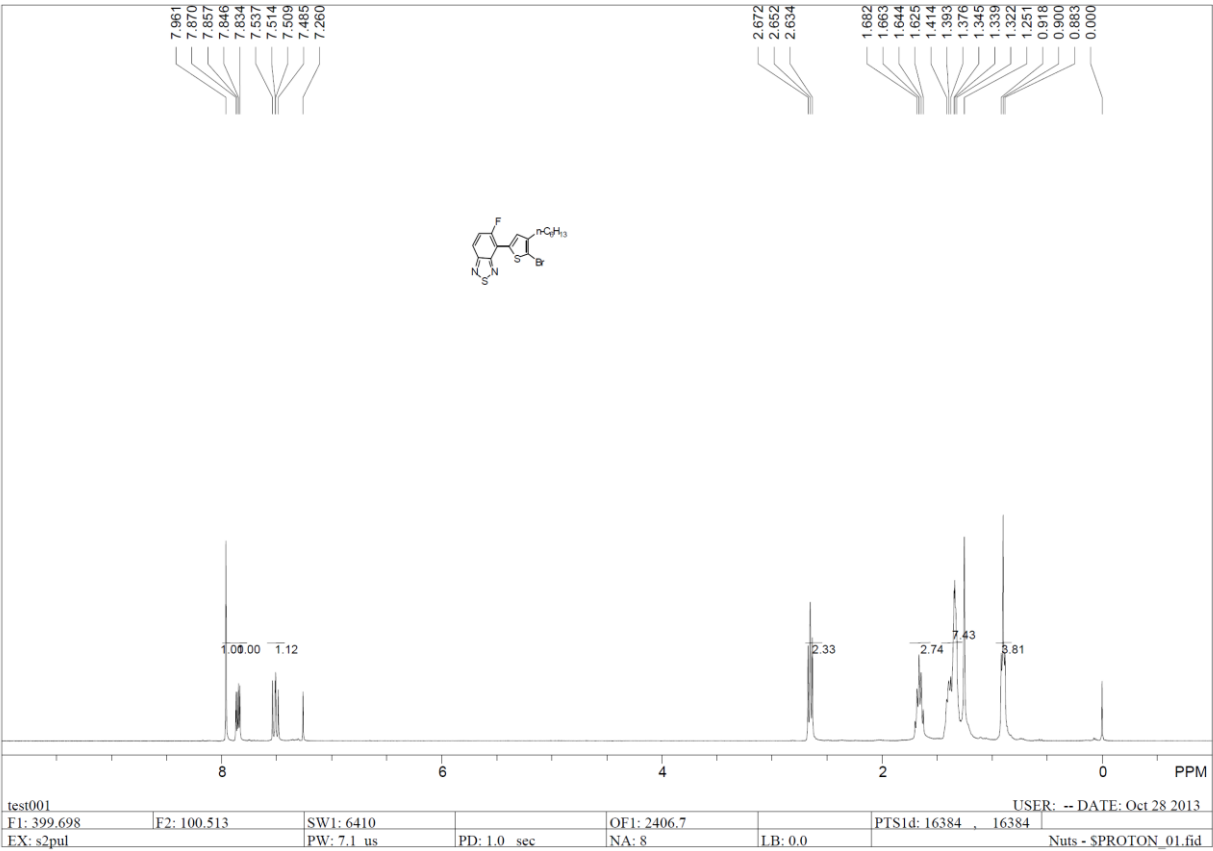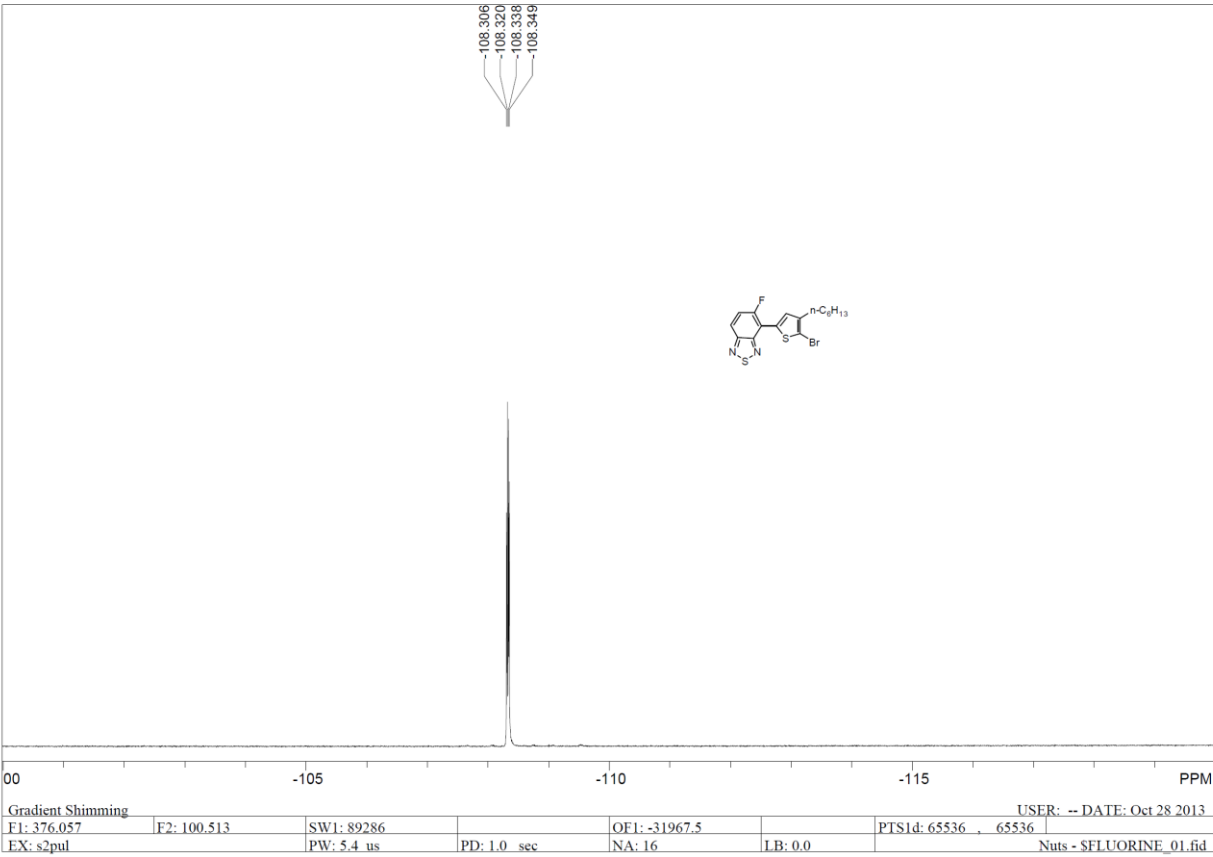

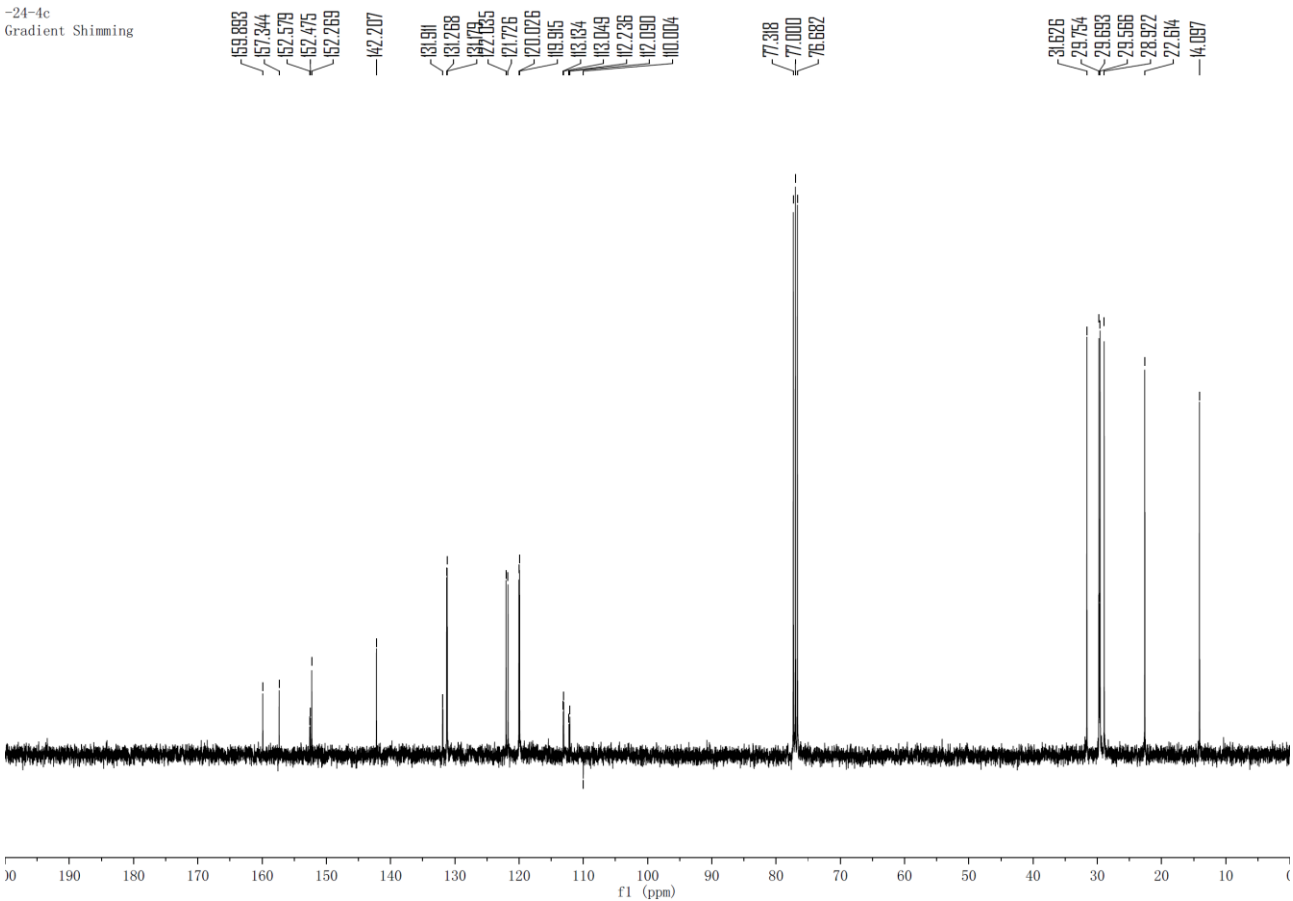

**4-(Benzo[b]thiophen-2-yl)-5-fluorobenzo[c][1,2,5]thiadiazole (9b).**

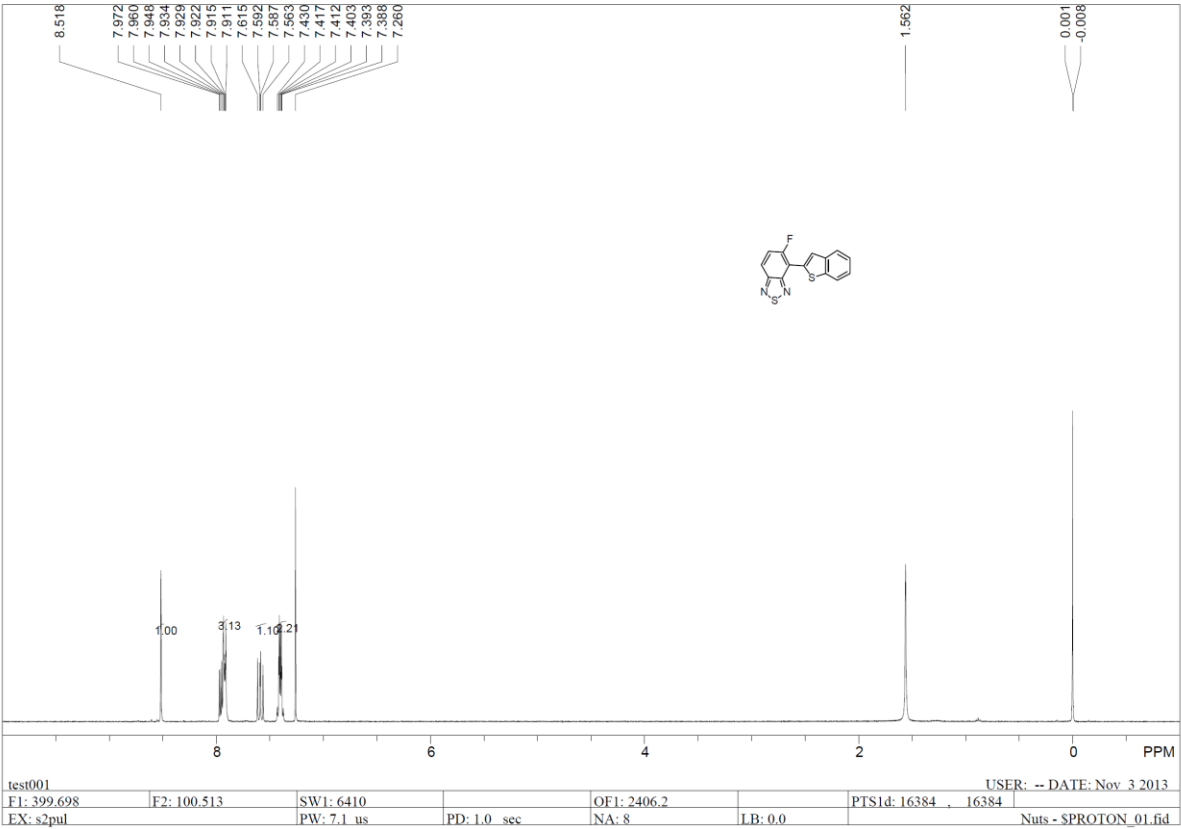



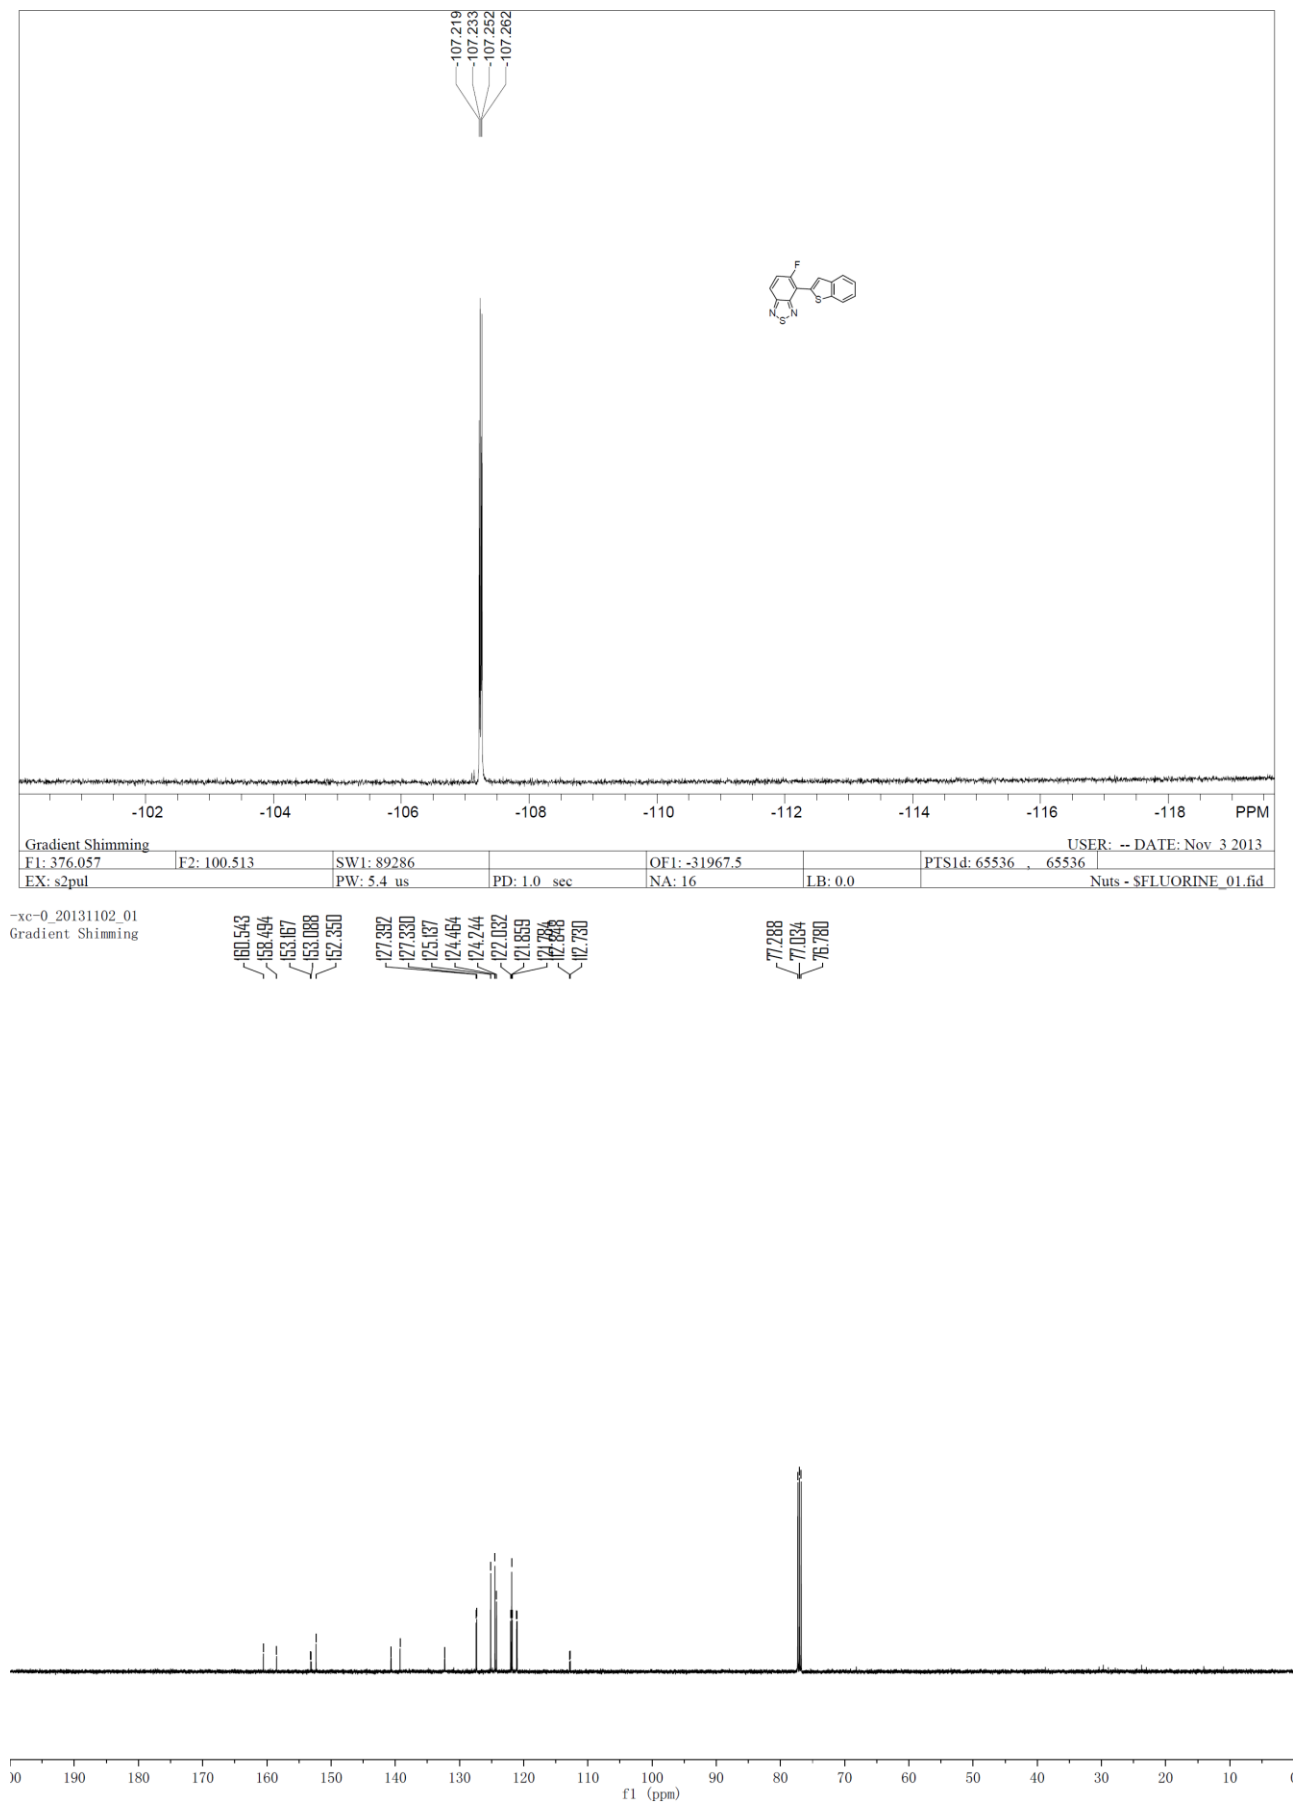

5-Fluoro-4-(5-phenylthiophen-2-yl)benzo[c][1,2,5]thiadiazole (9c).

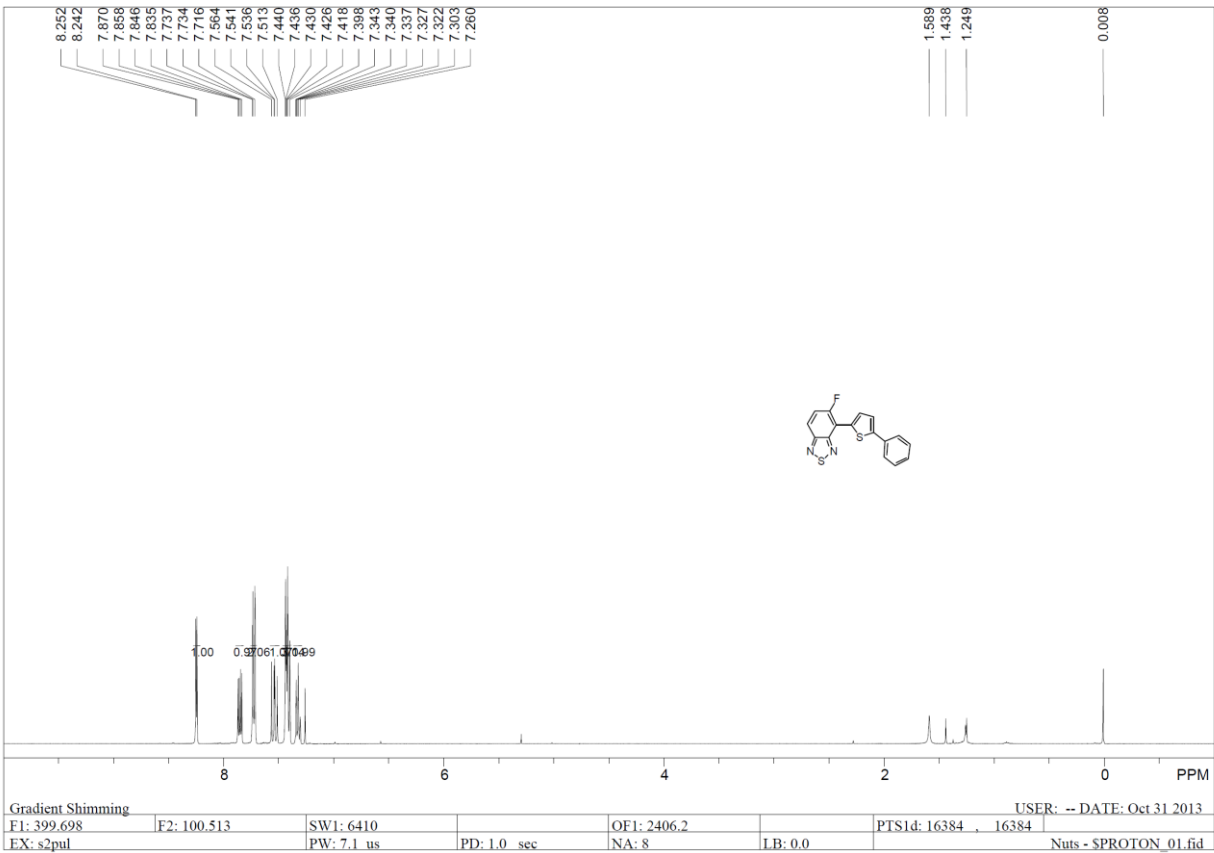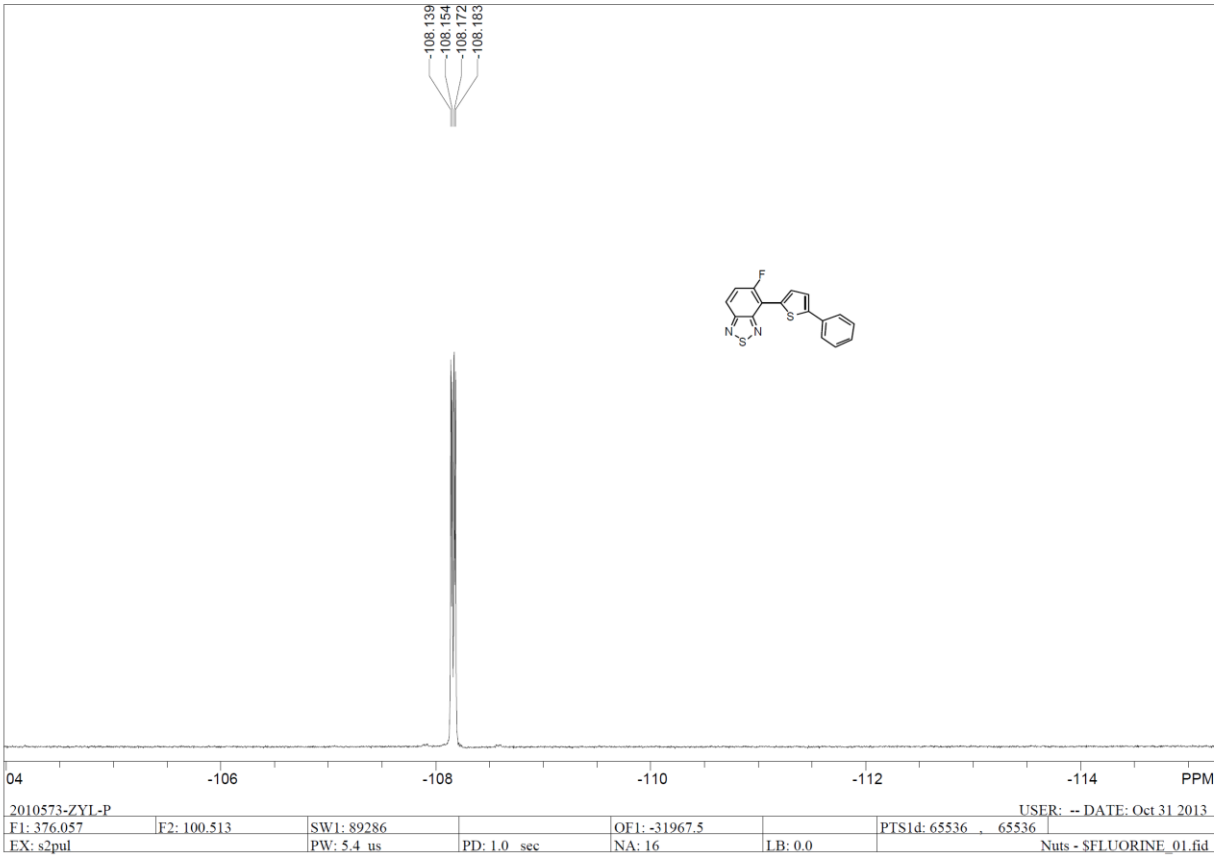

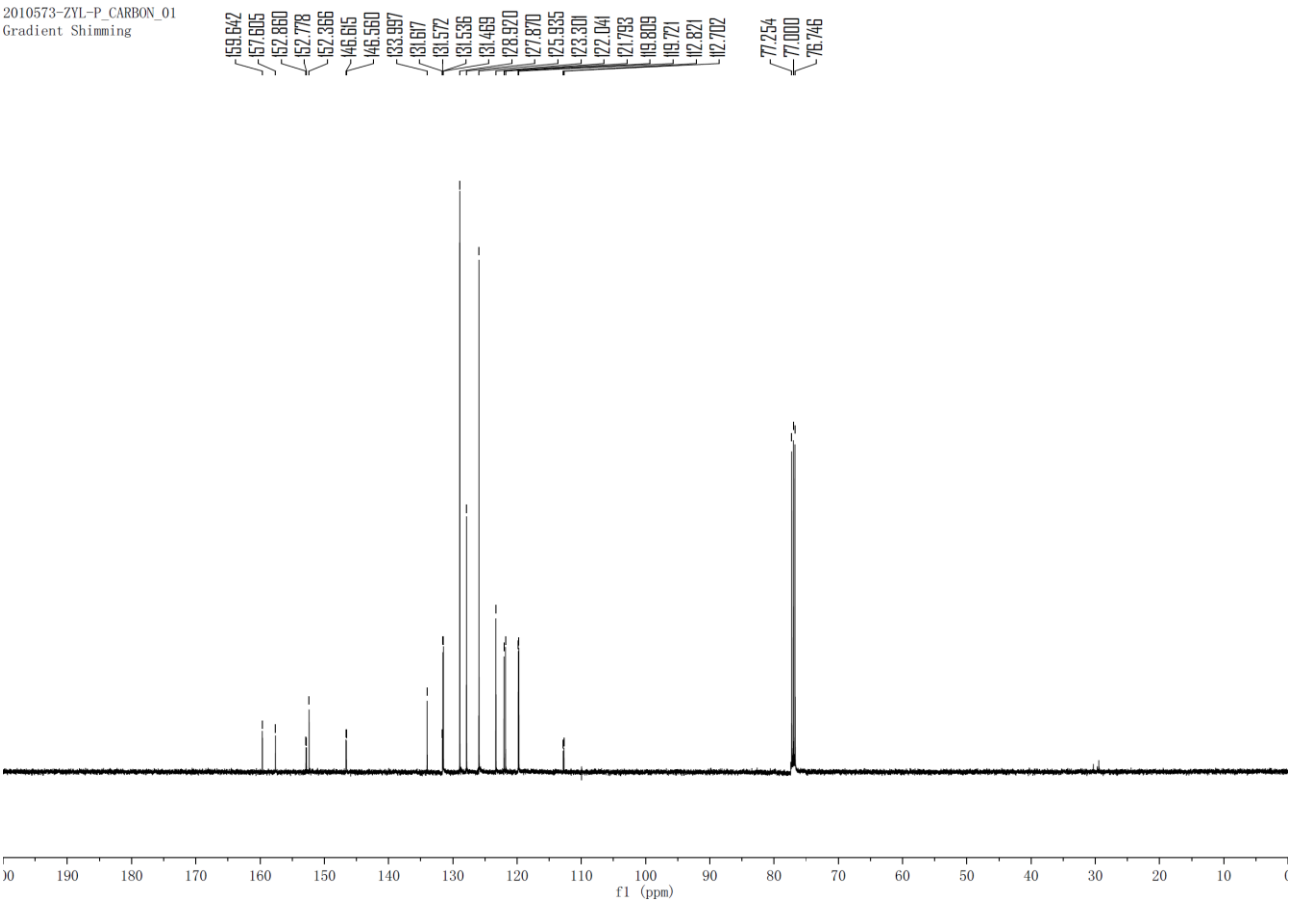

**7-Bromo-4-(5-chlorothiophen-2-yl)-5-fluorobenzo[c][1,2,5]thiadiazole (9d).**

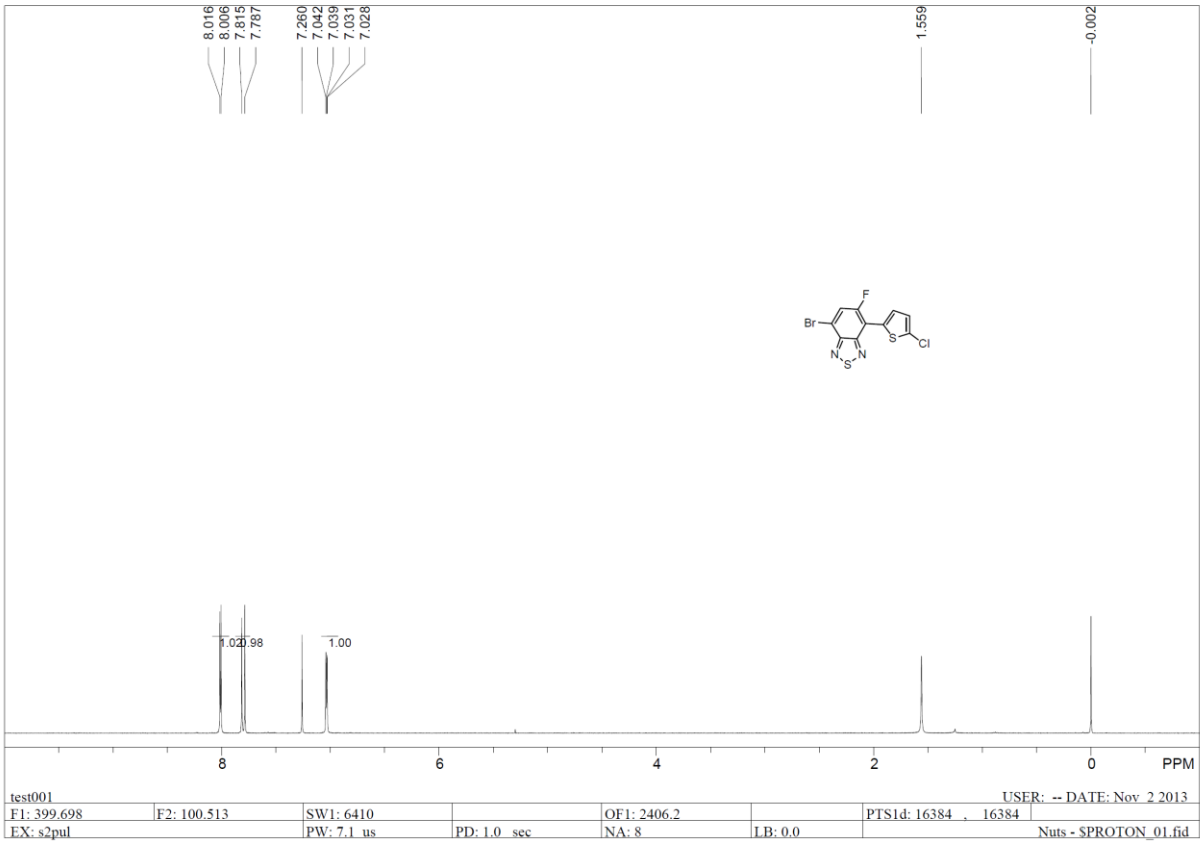

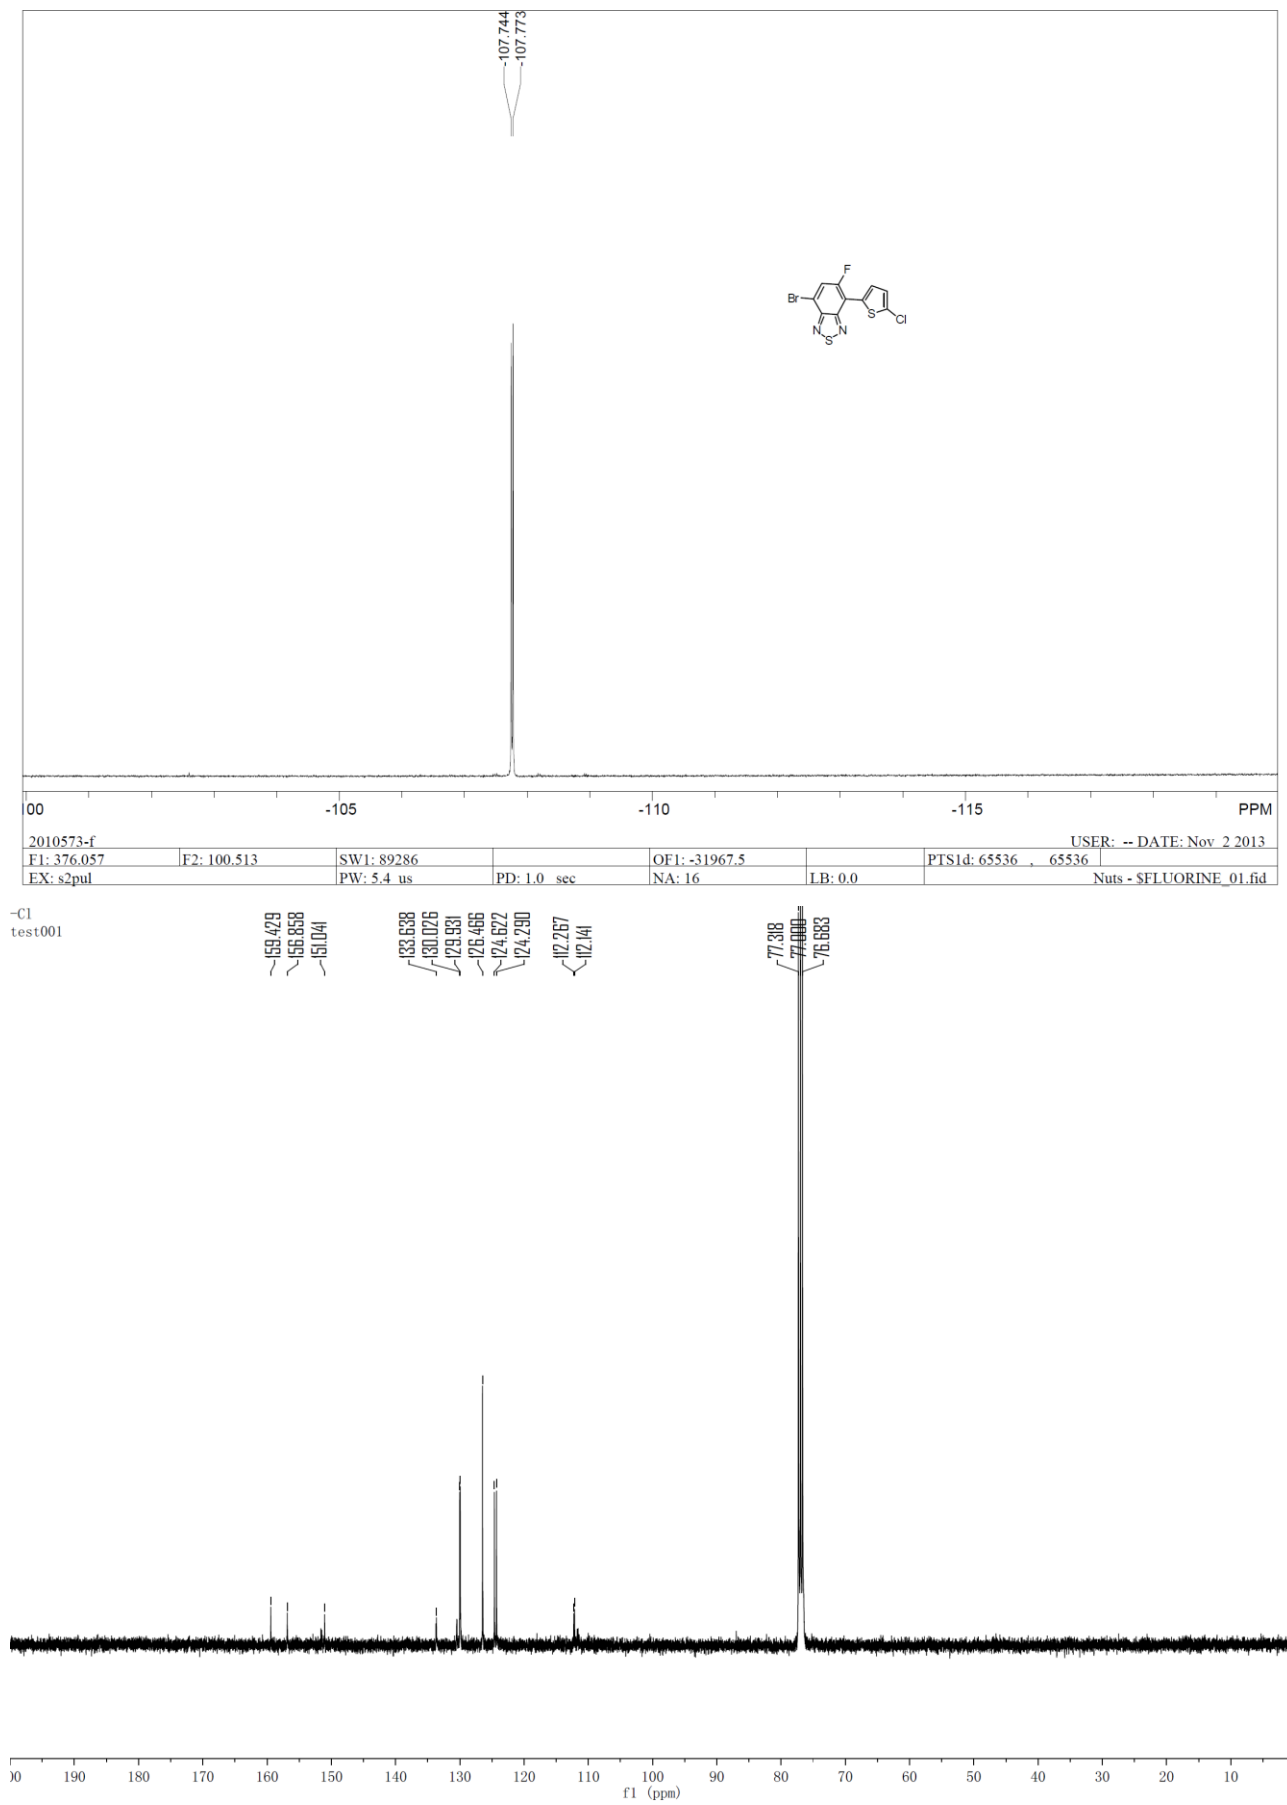

4-(5-Bromothiophen-2-yl)-5,6-difluorobenzo[c][1,2,5]thiadiazole (7d).

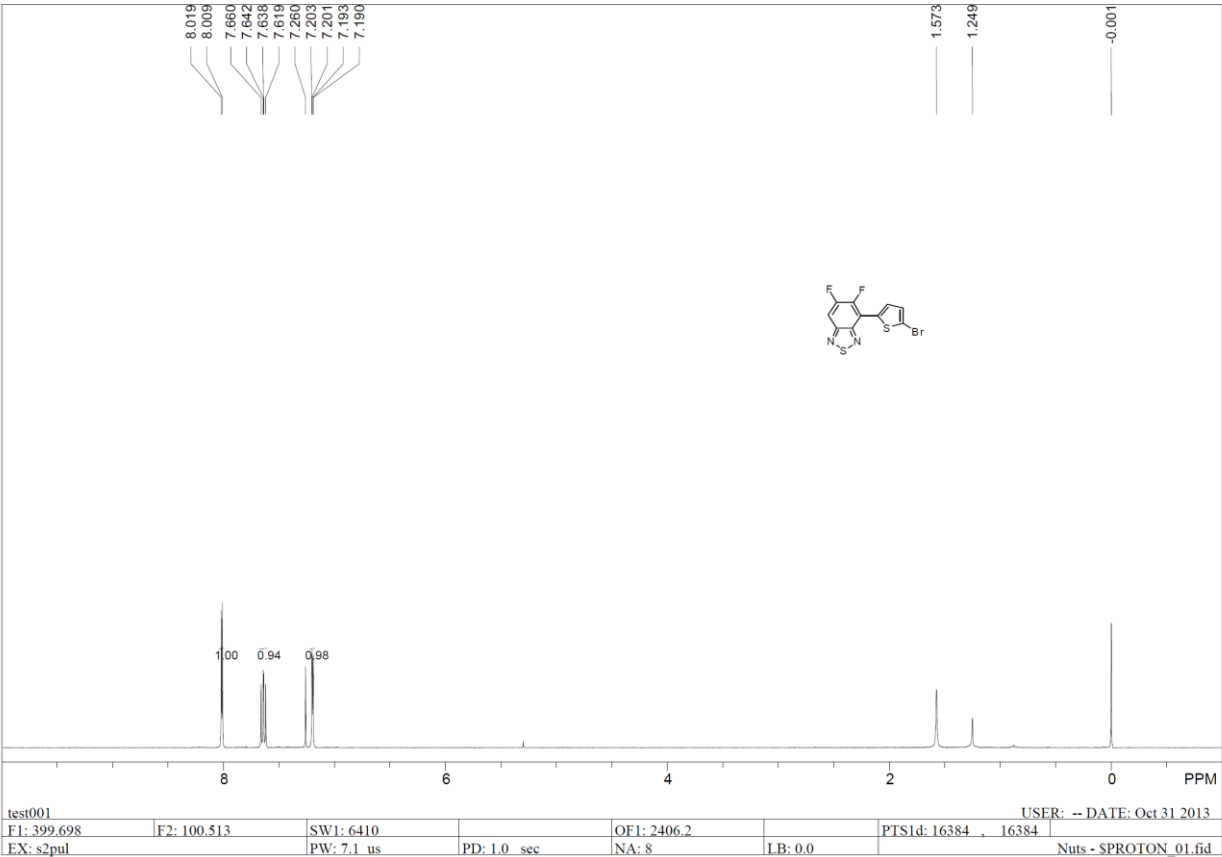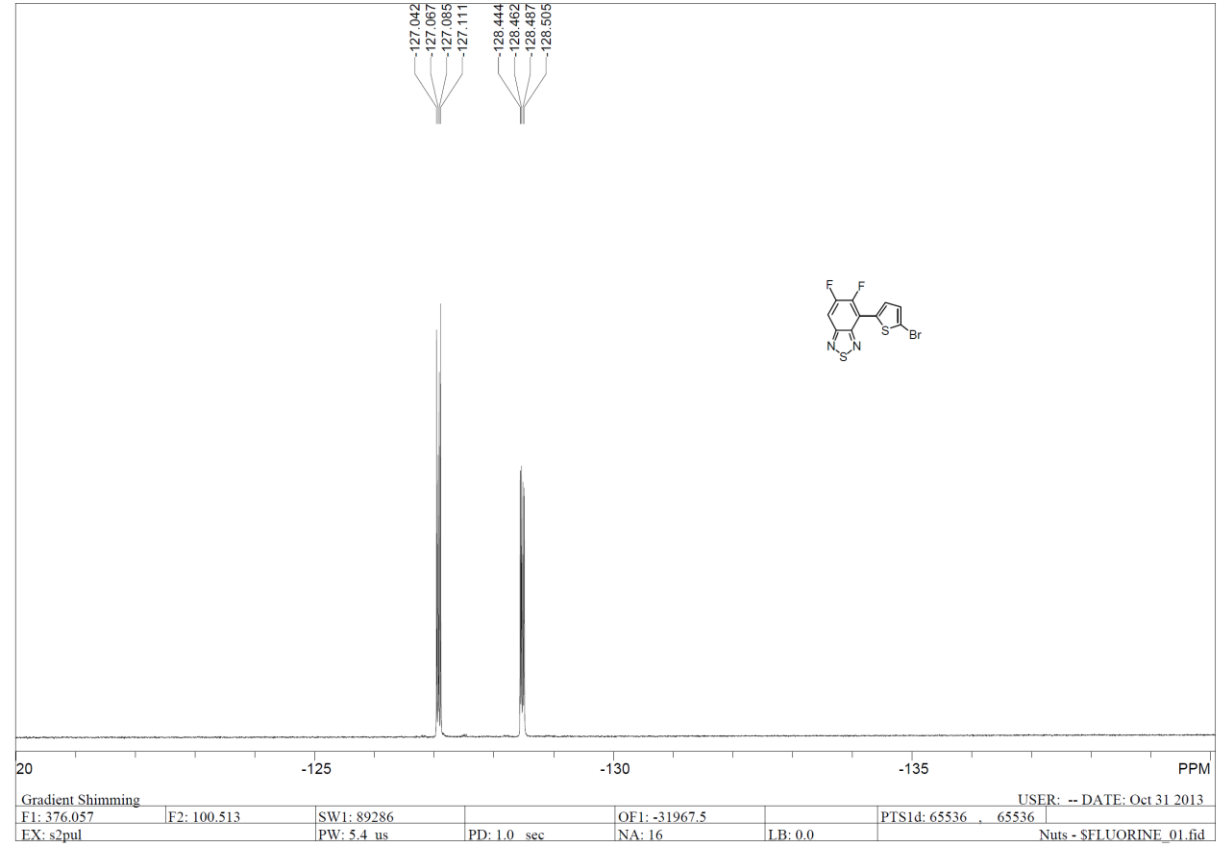

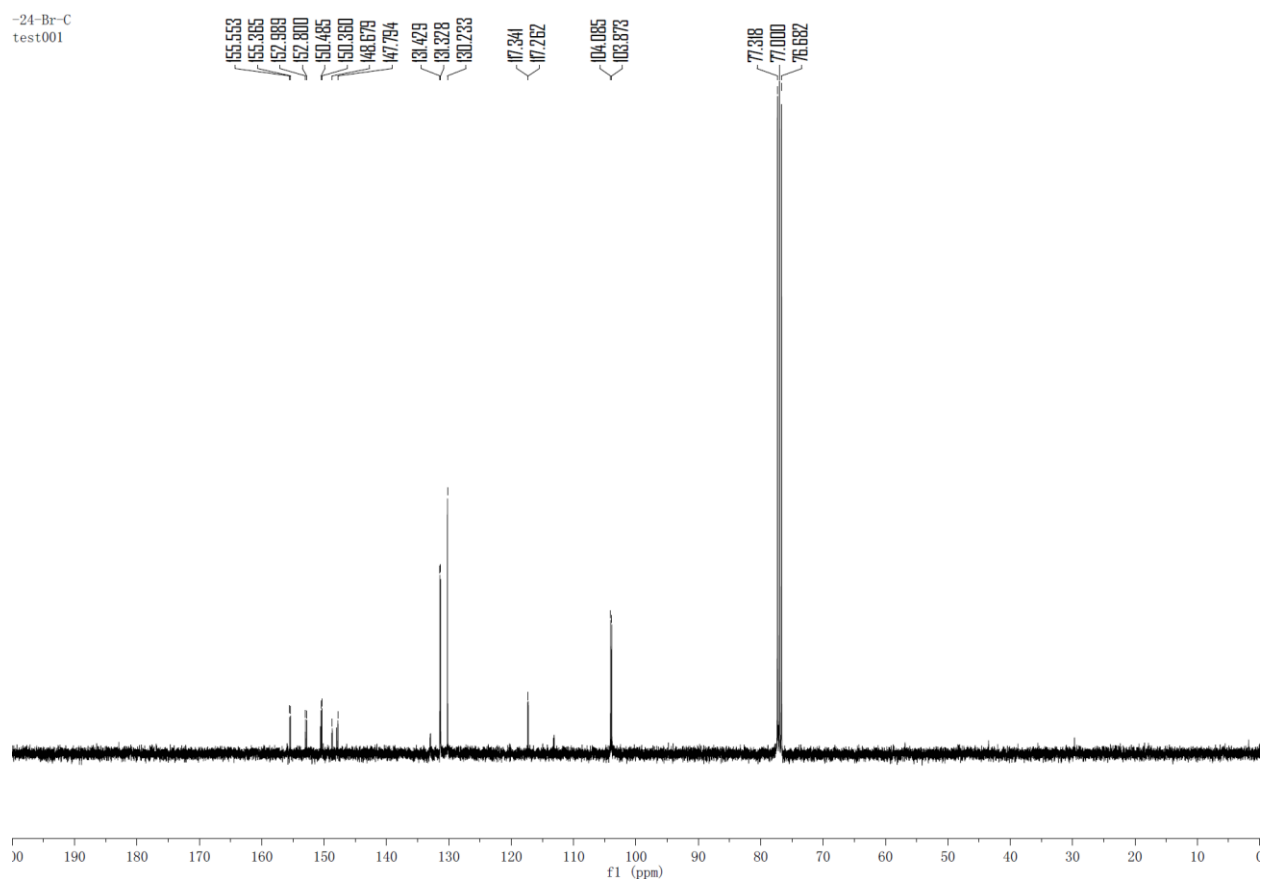

5-(5,6-difluorobenzo[c][1,2,5]thiadiazol-4-yl)thiophene-2-carbaldehyde (7e).

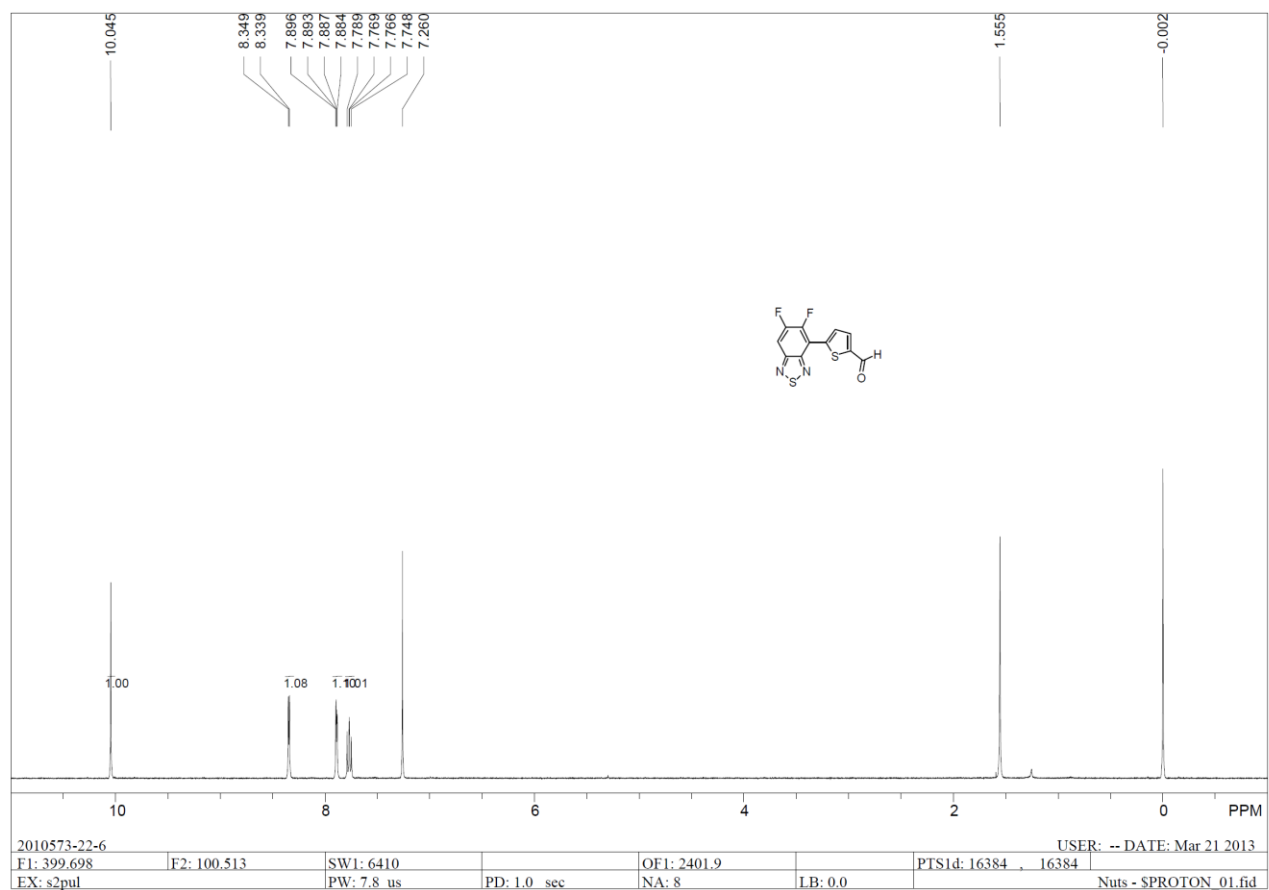

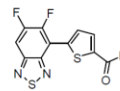cc-22-6  
STANDARD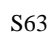

**4-(4,8-Bis(octyloxy)benzo[1,2-b:4,5-b']dithiophen-2-yl)-7-(5-bromothiophen-2-yl)-5,6-difluorobenzo[c][1,2,5]thiadiazole (11).**

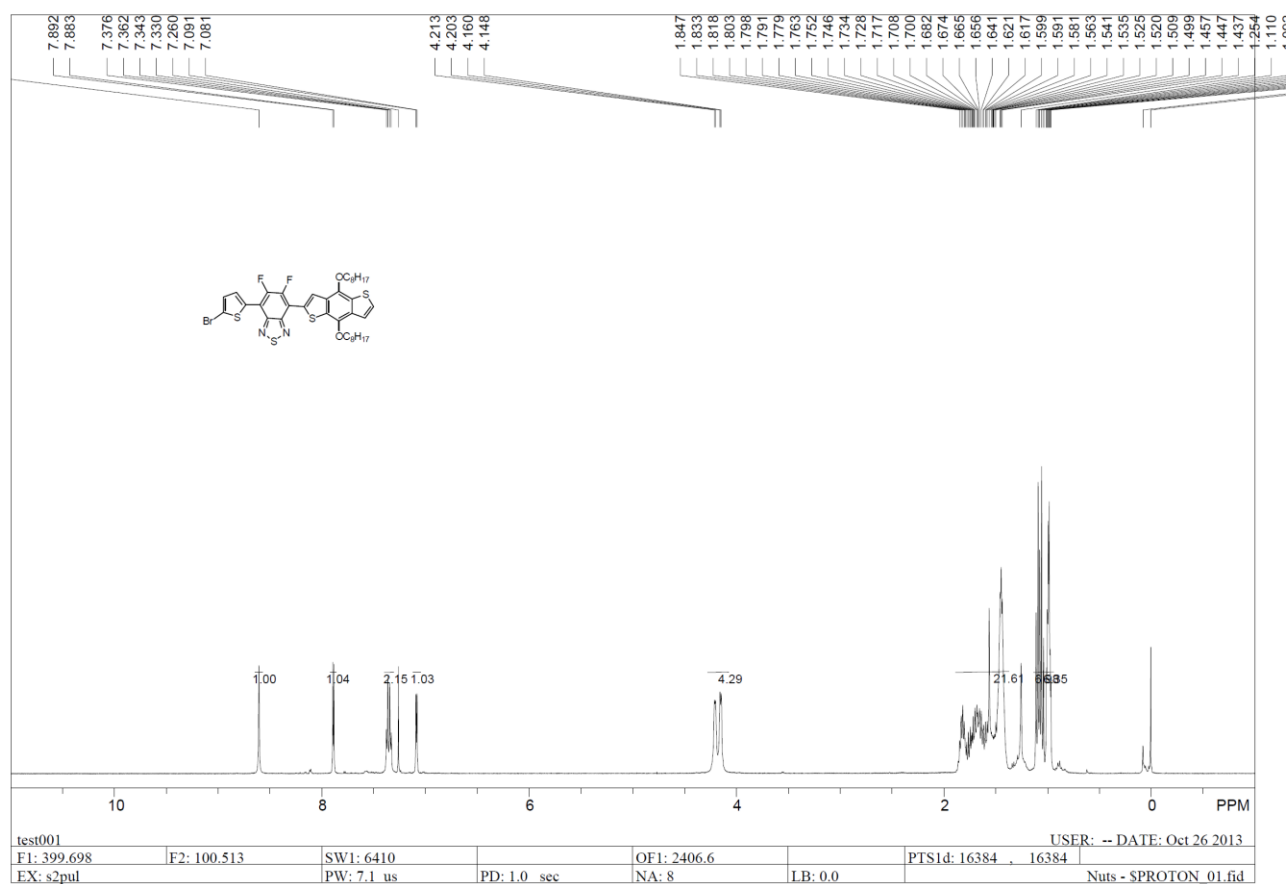



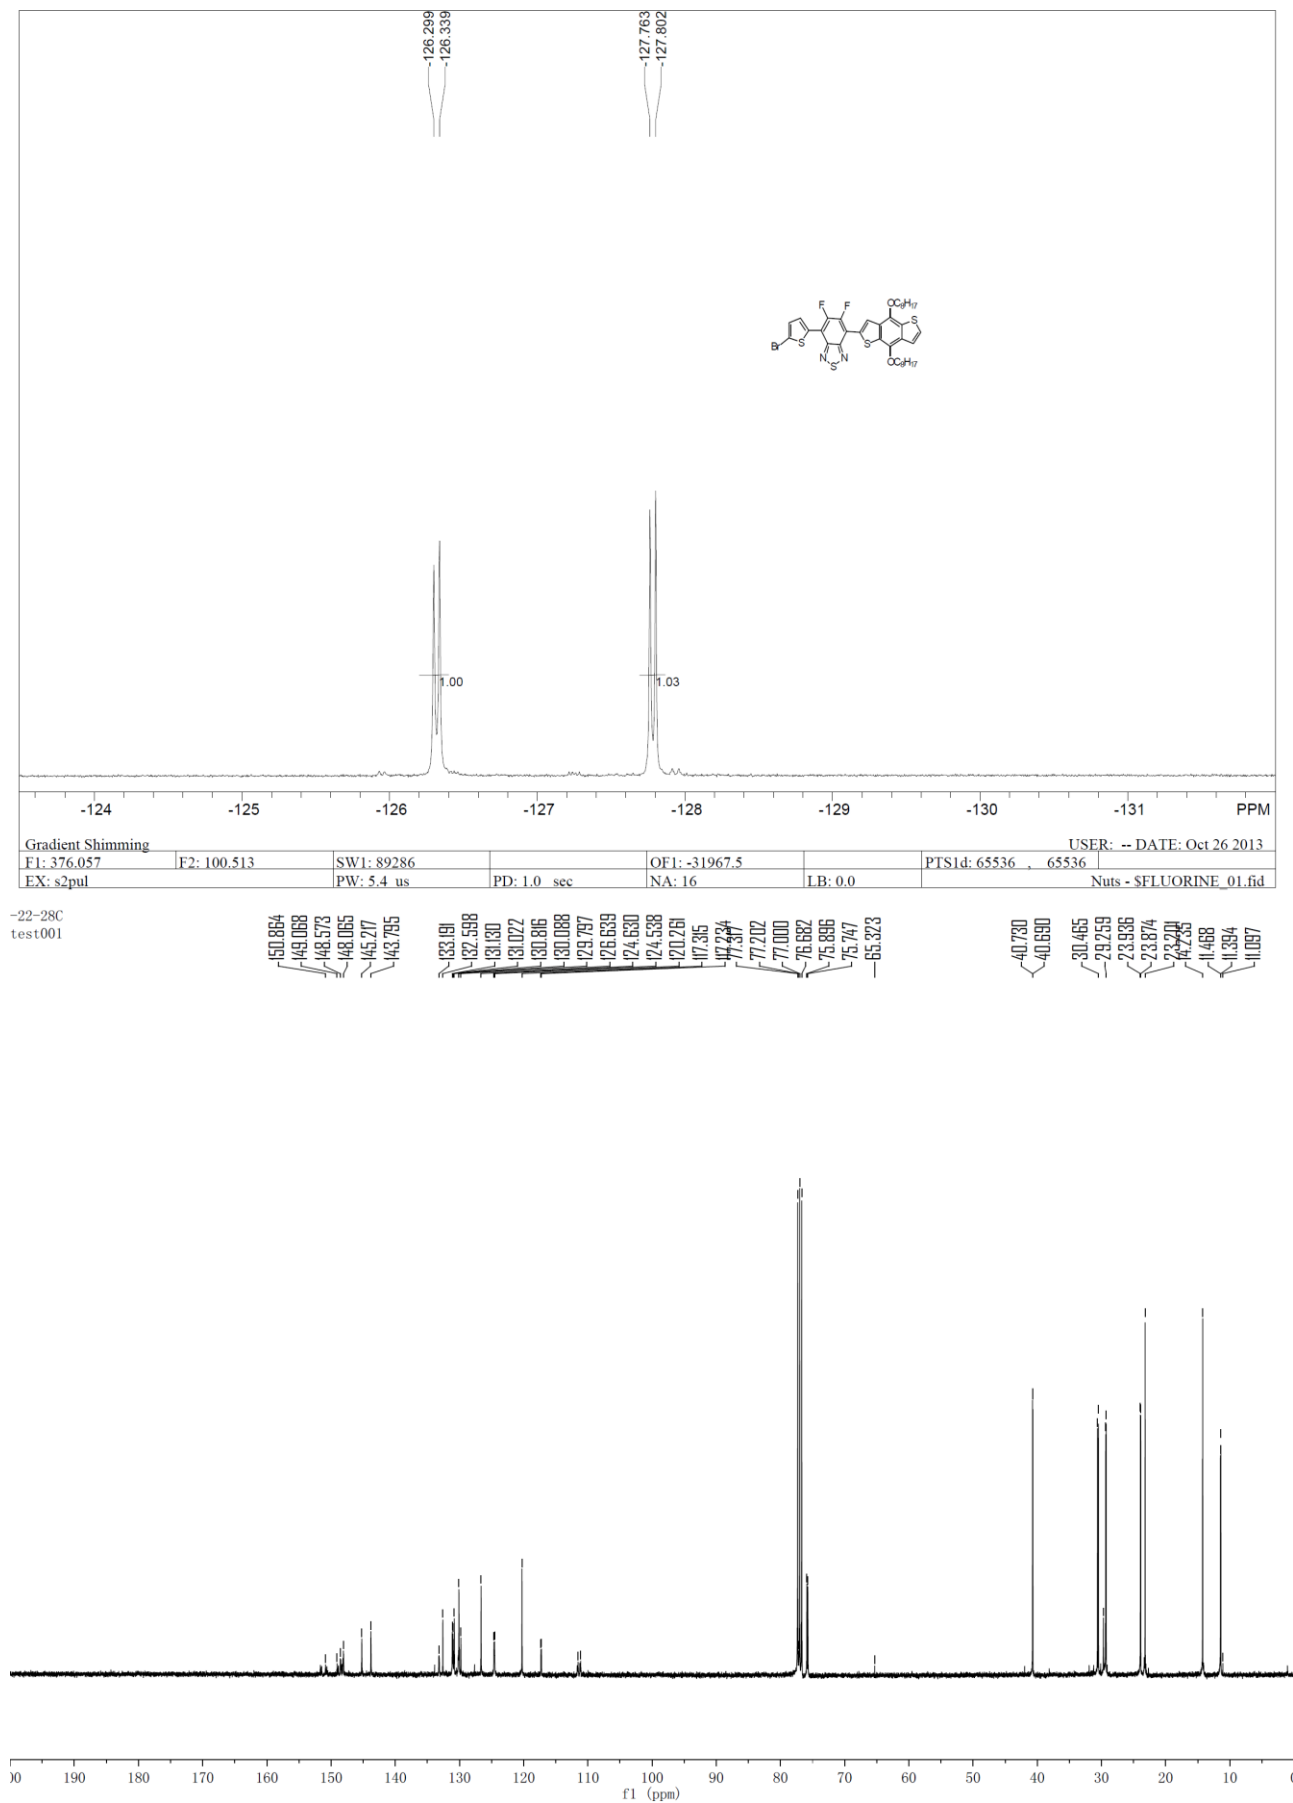

5-(7-(4,8-Bis(octyloxy)benzo[1,2-b:4,5-b']dithiophen-2-yl)-5,6-difluorobenzo[c][1,2,5]thiadiazol-4-yl)thiophene-2-carbaldehyde (12).

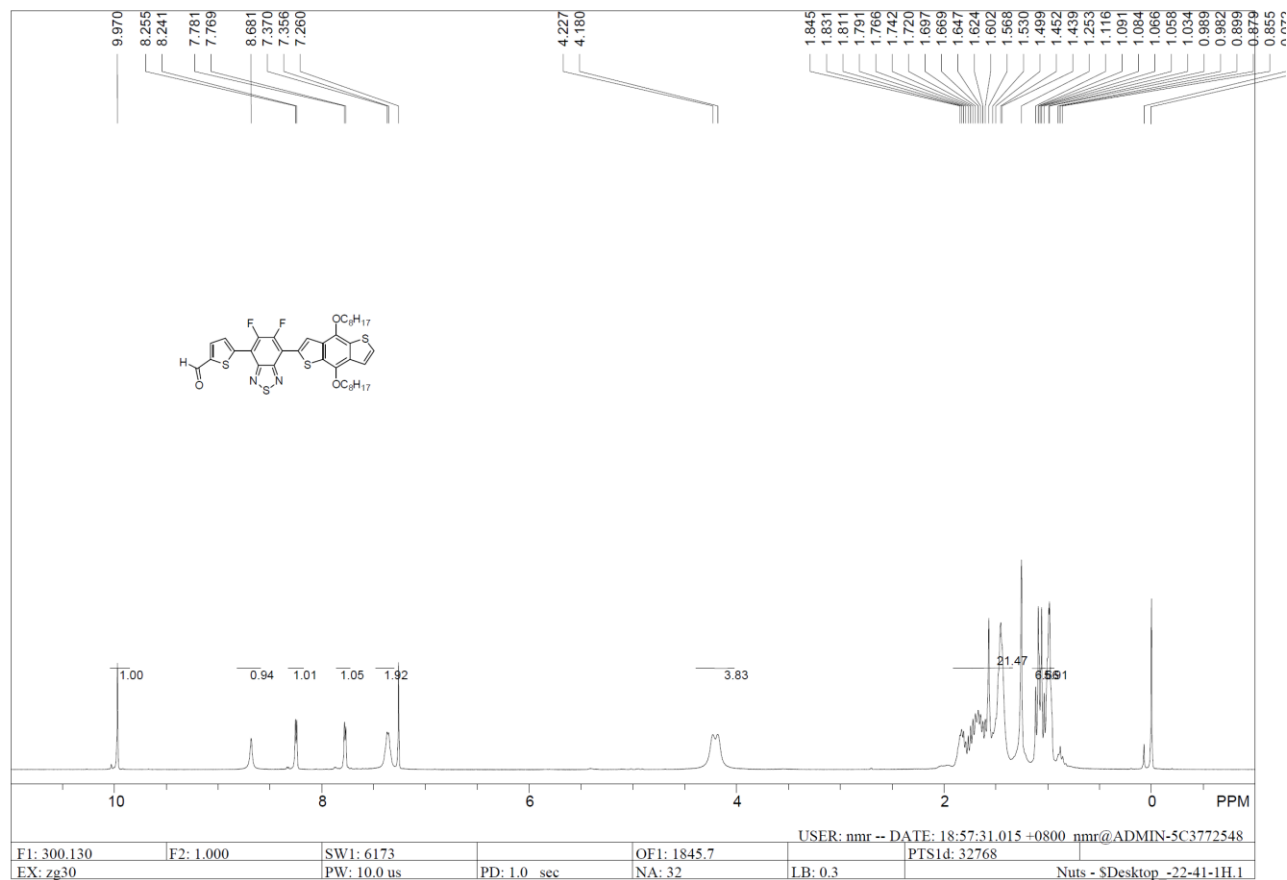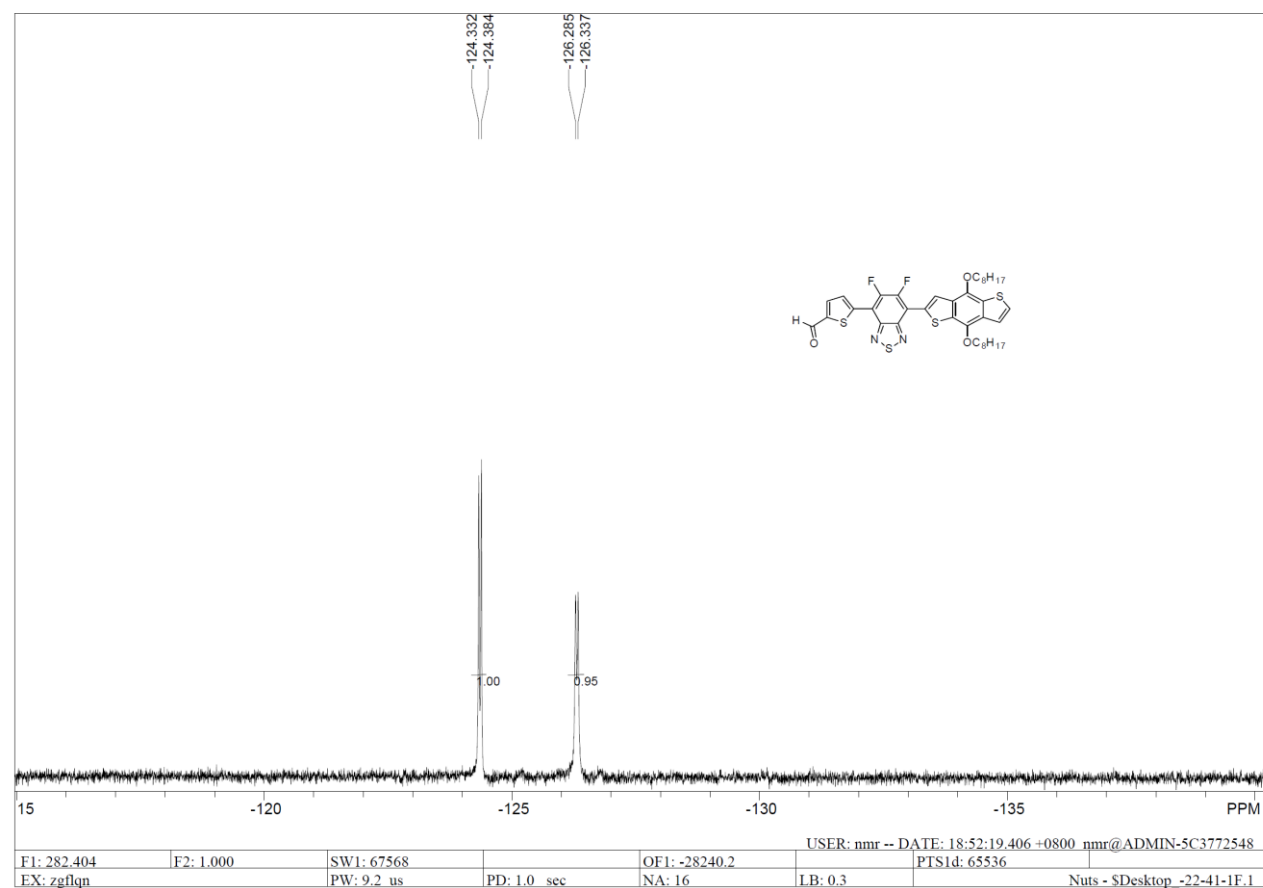

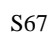

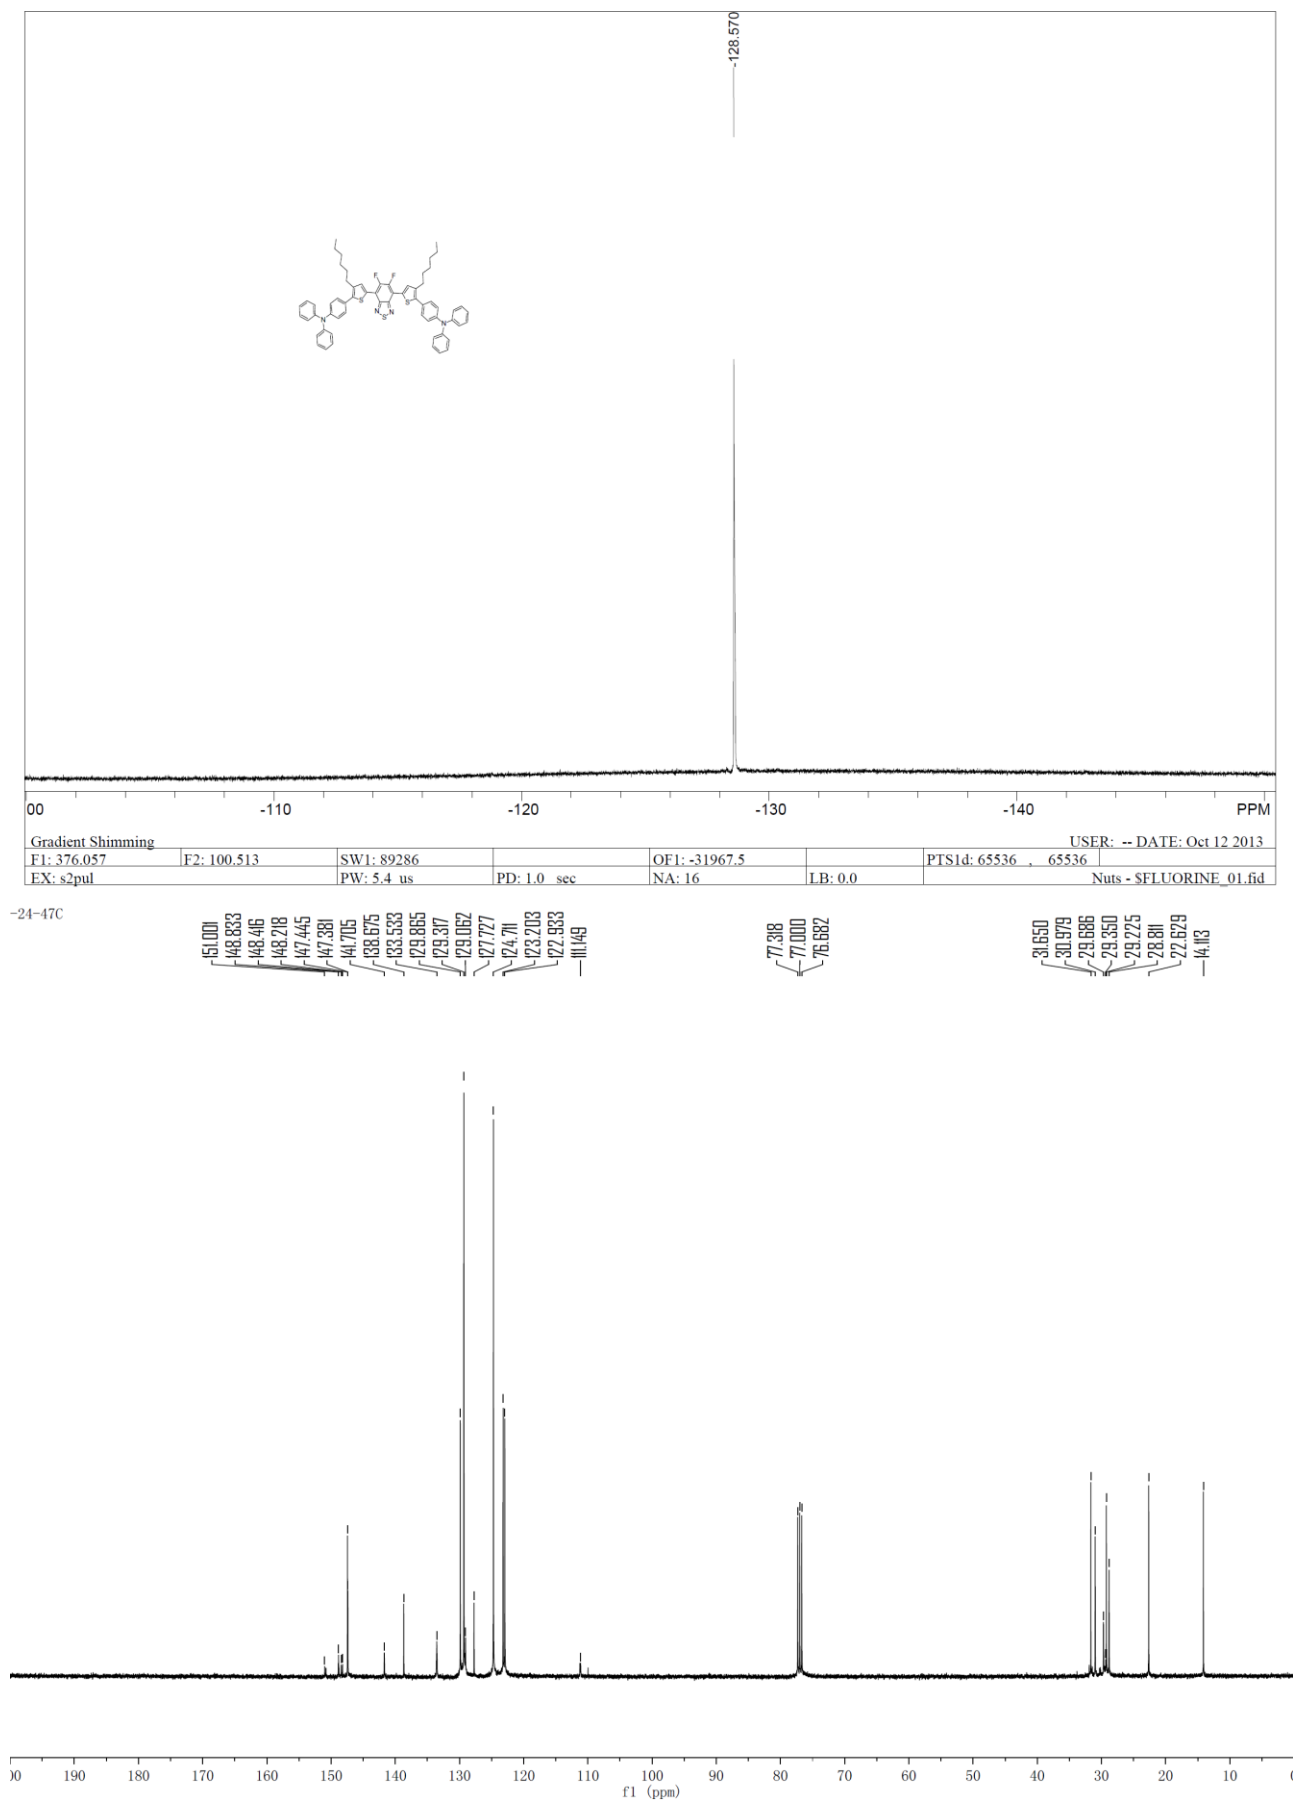

Supplement: c3sc53119h.pdf [file c3sc53119h.pdf]
